# Supplementary material
Source: PubMed Central journal article supplement (PMC7979528)

Figure 5a

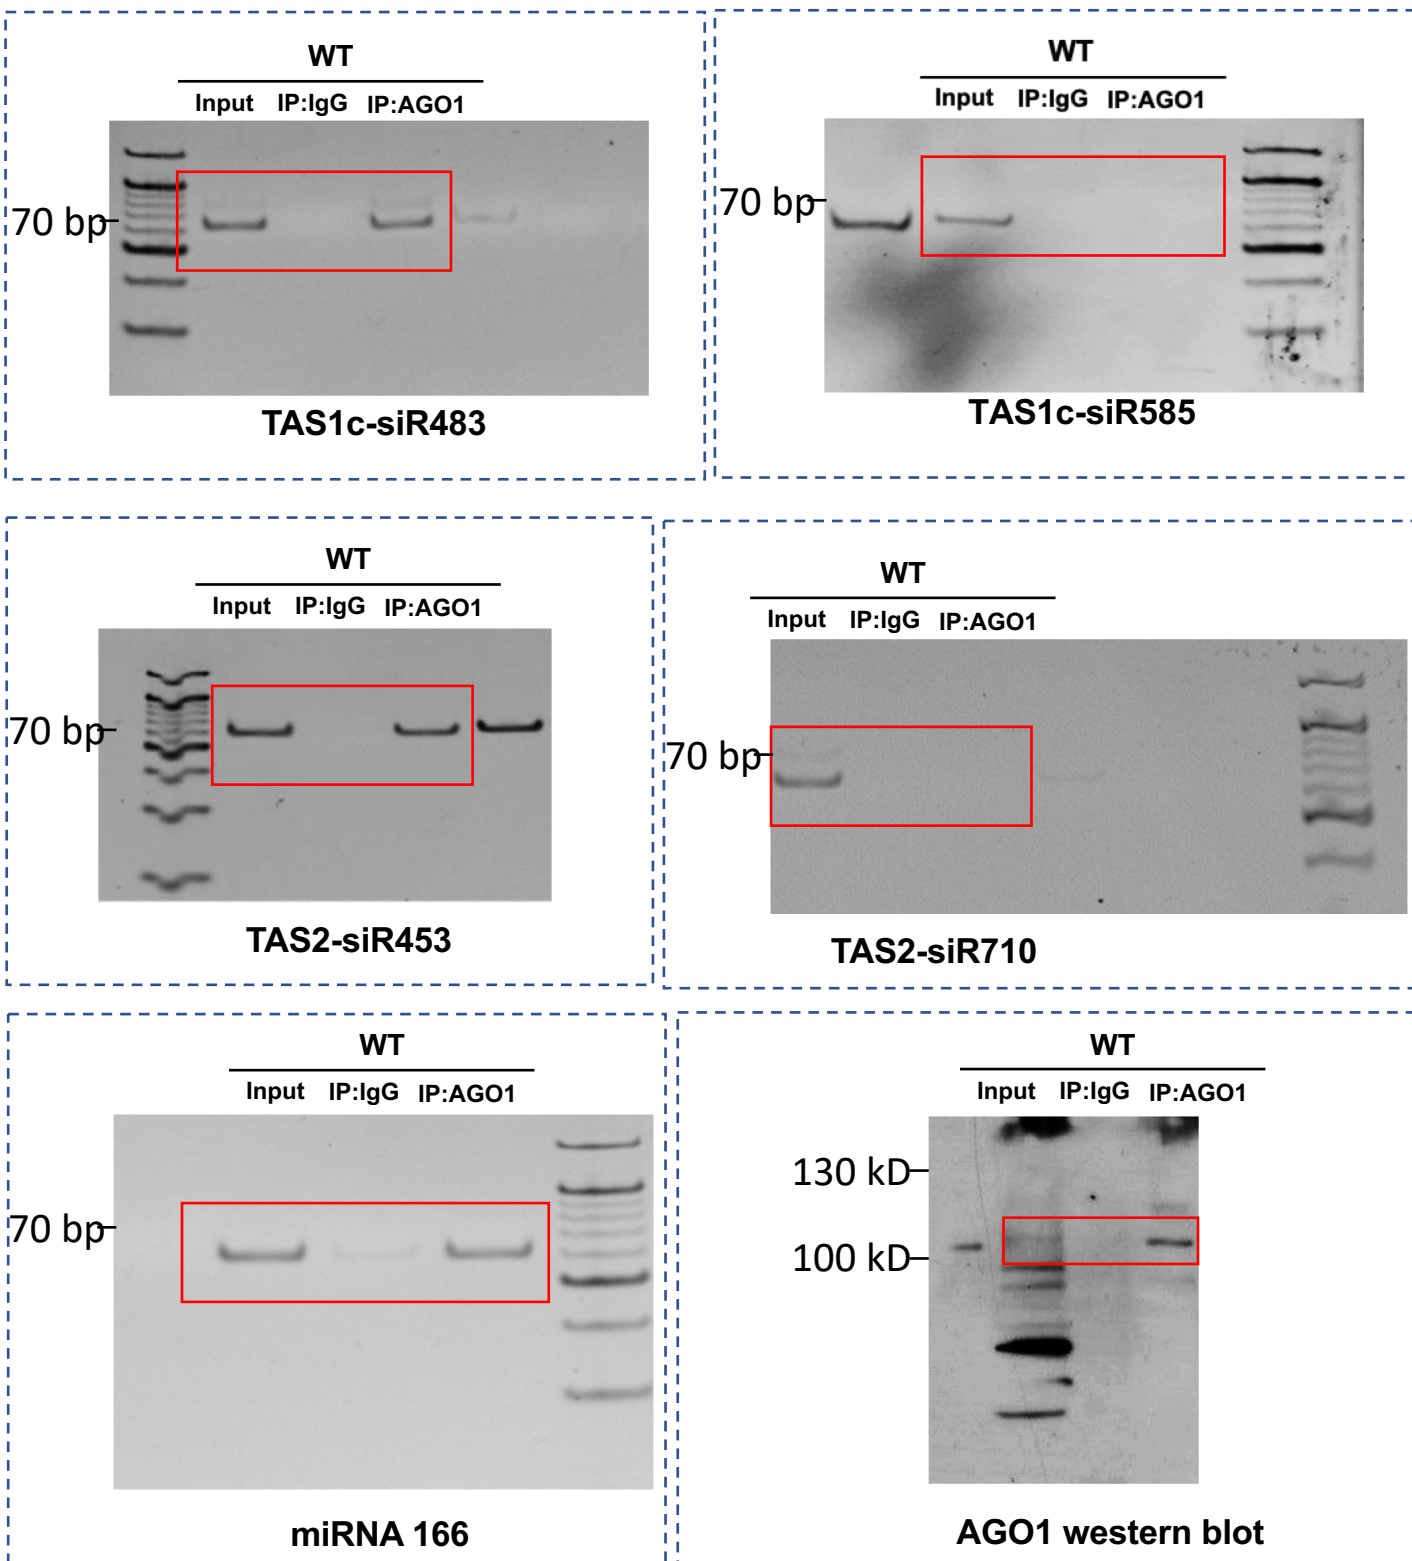

Figure 5a

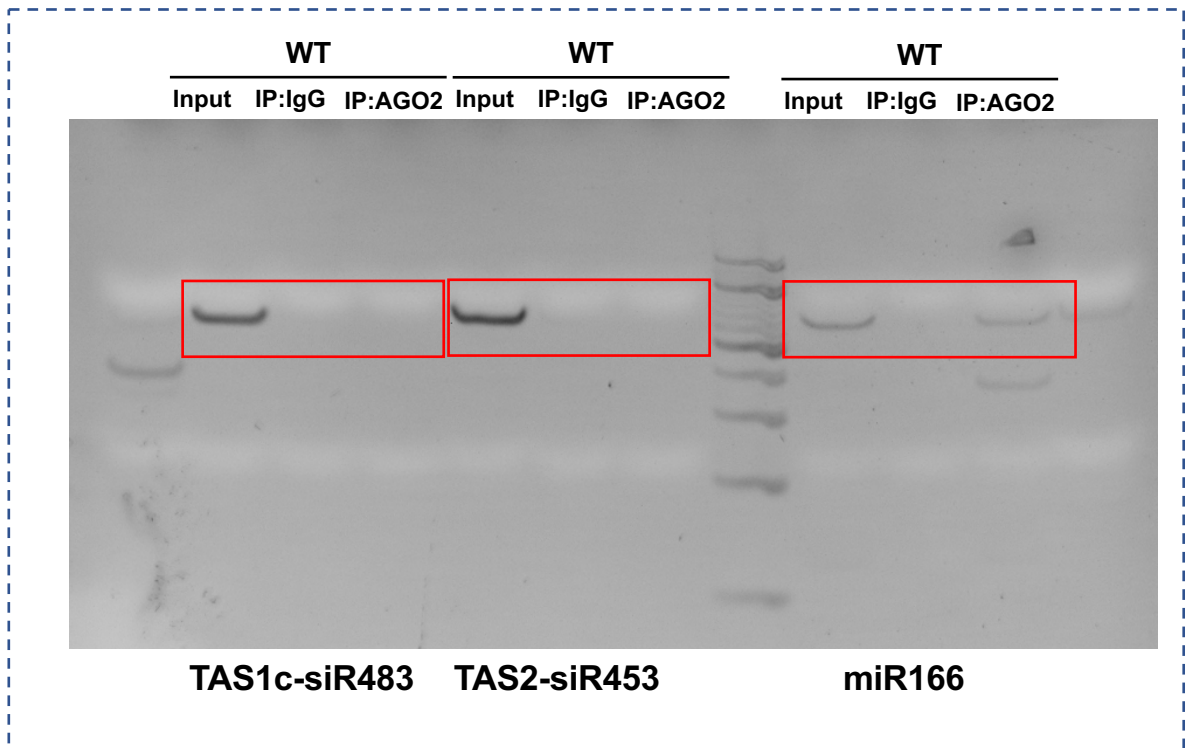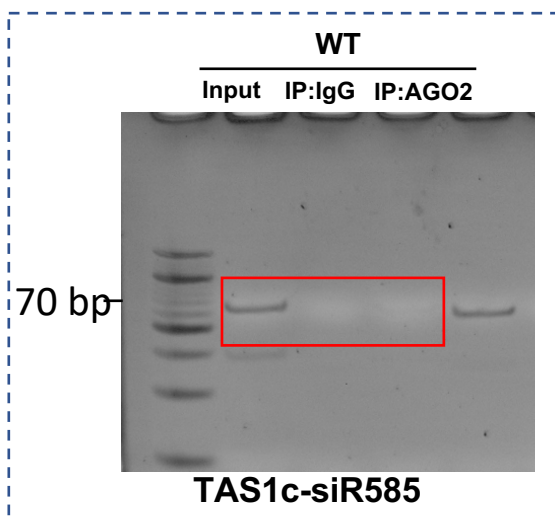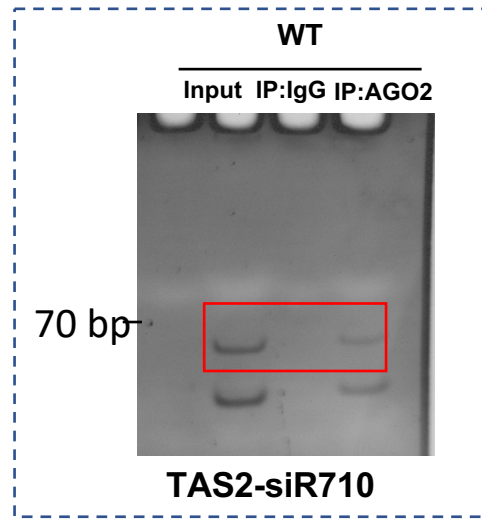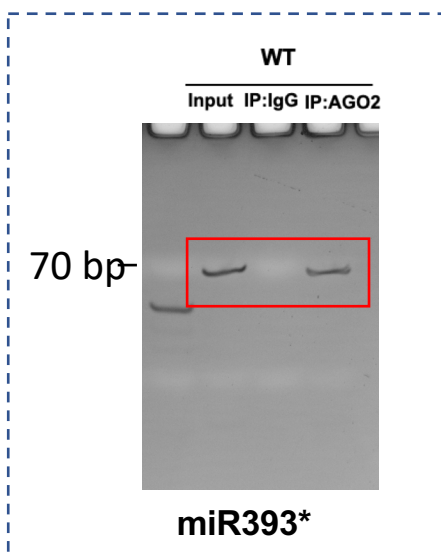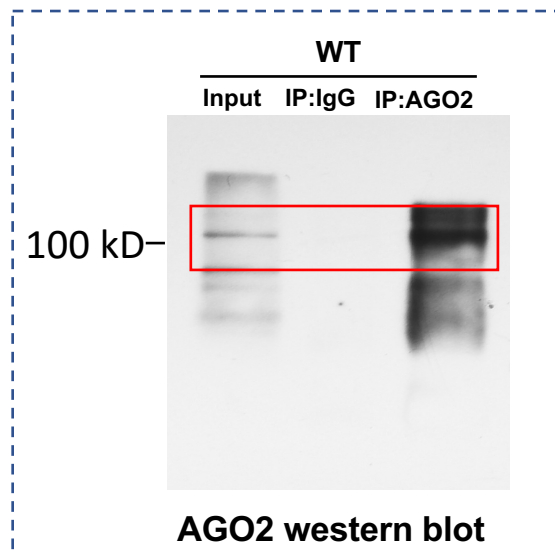

Figure 5a

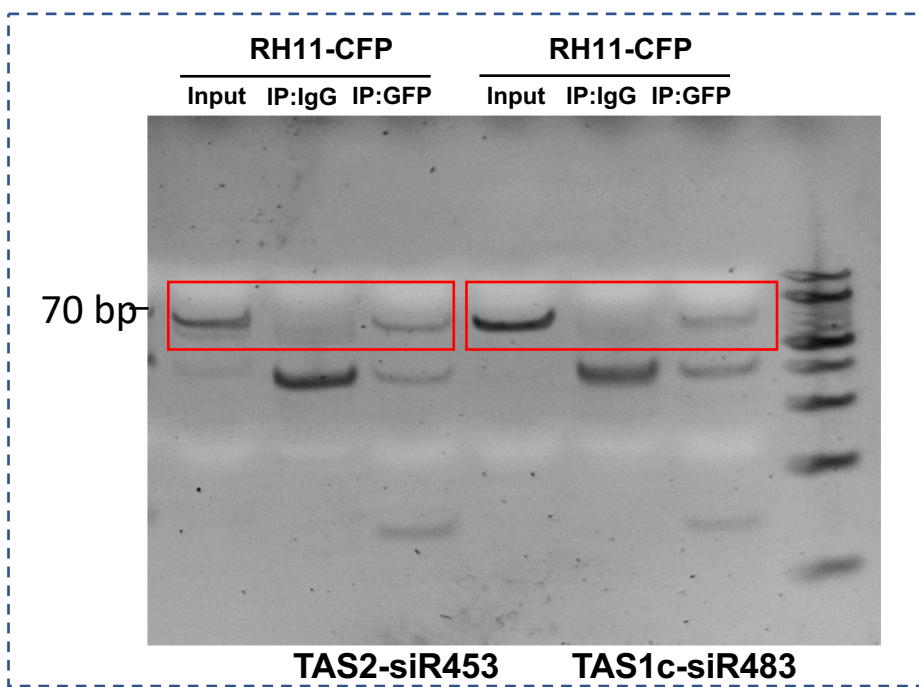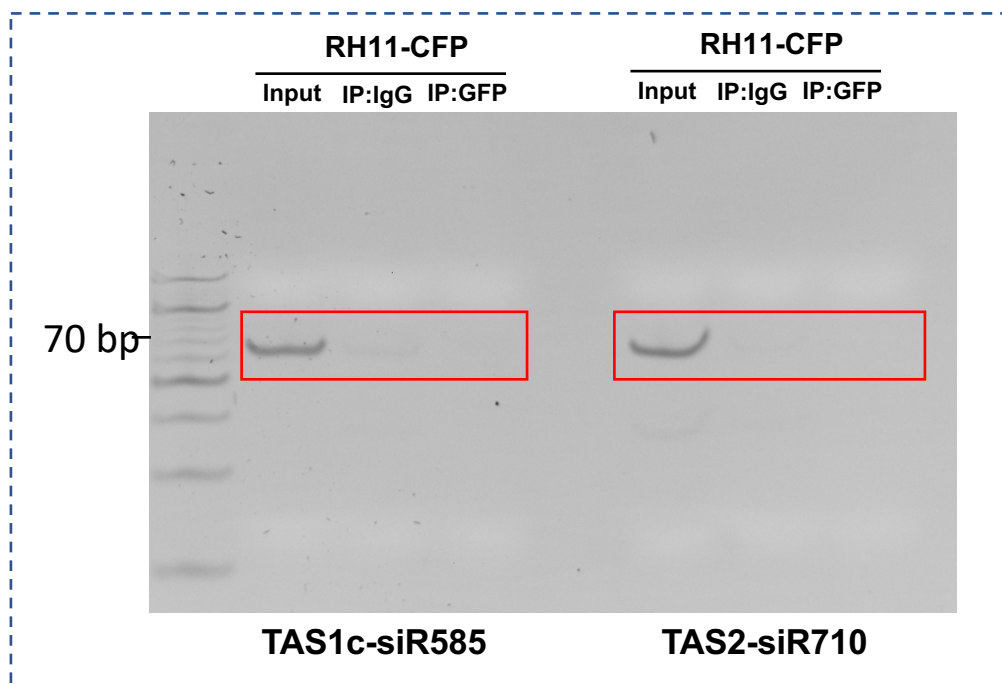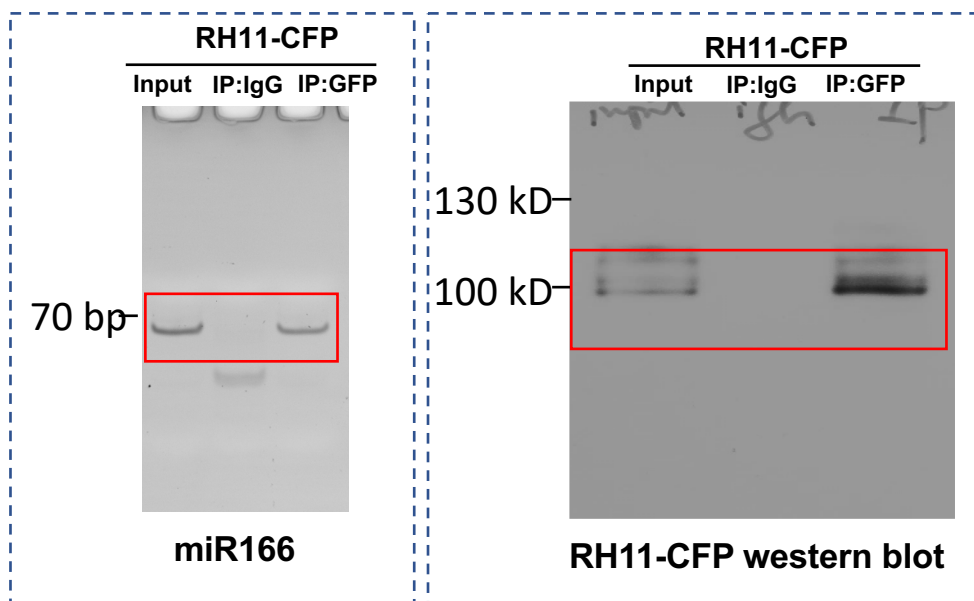

Figure 5a

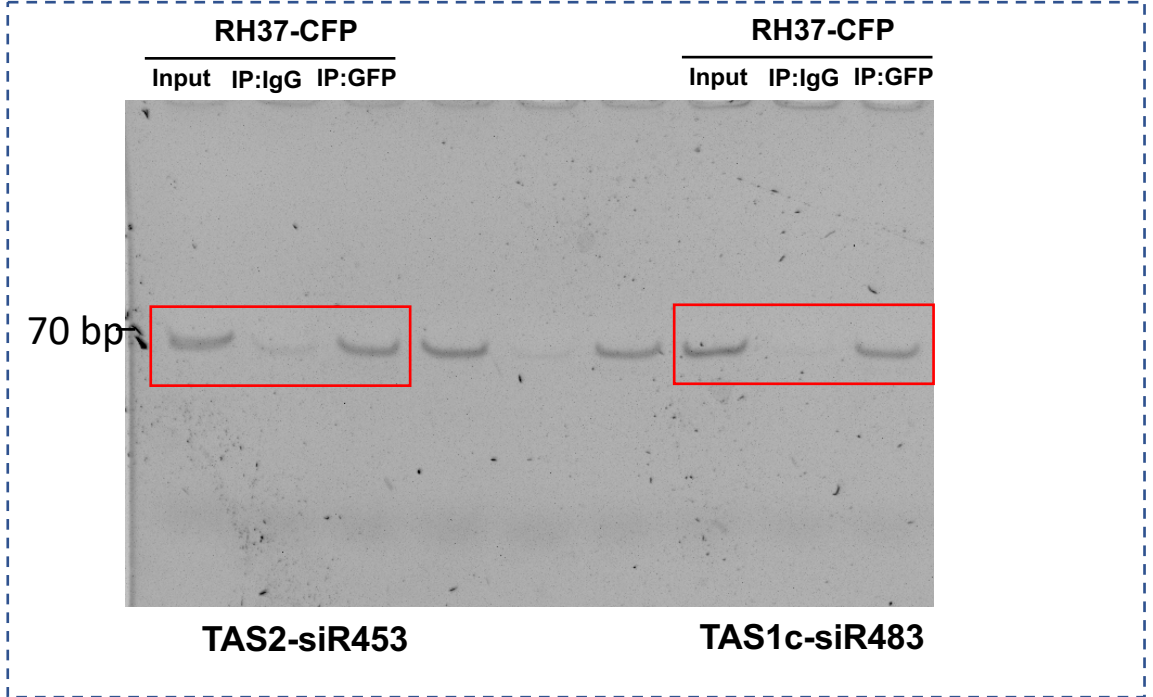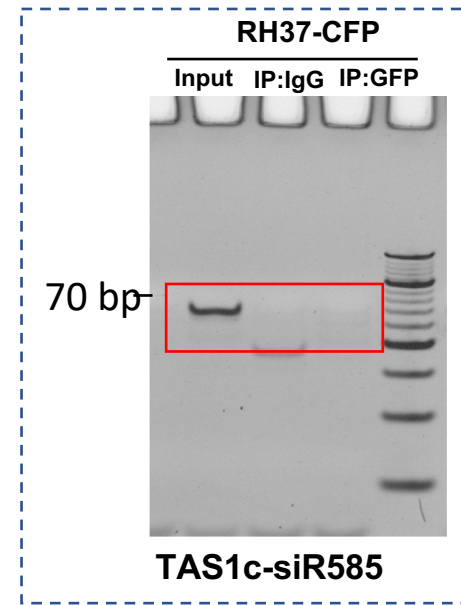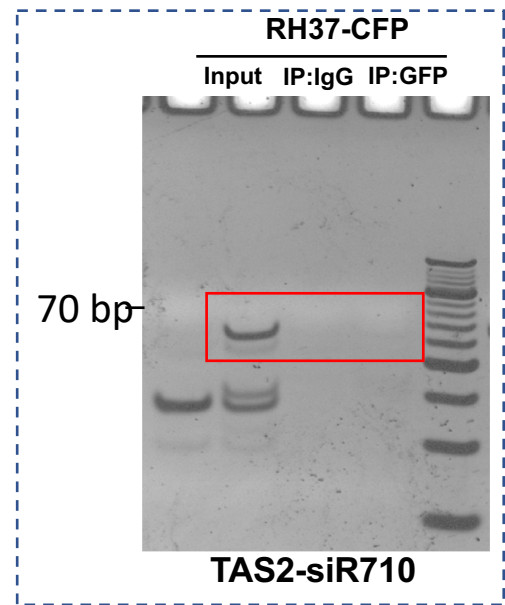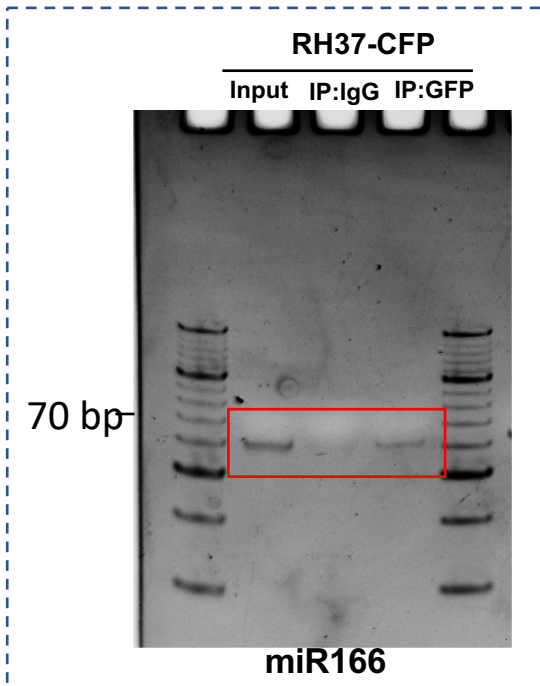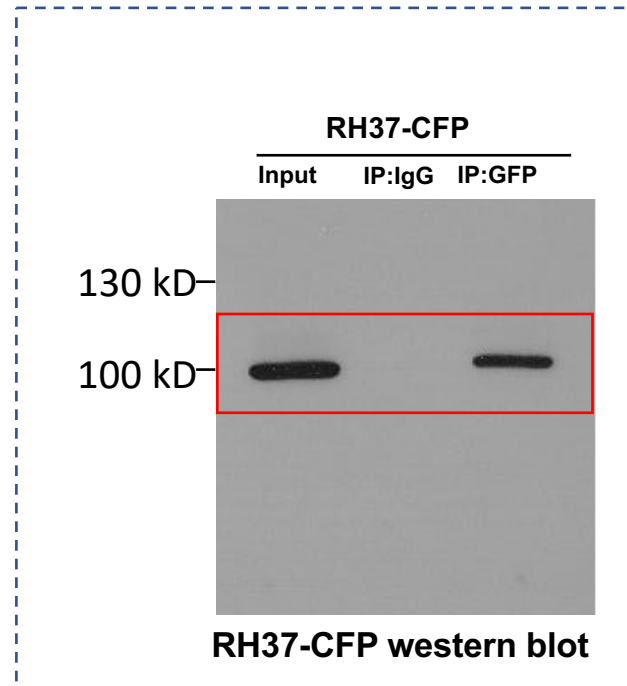

Figure 5a

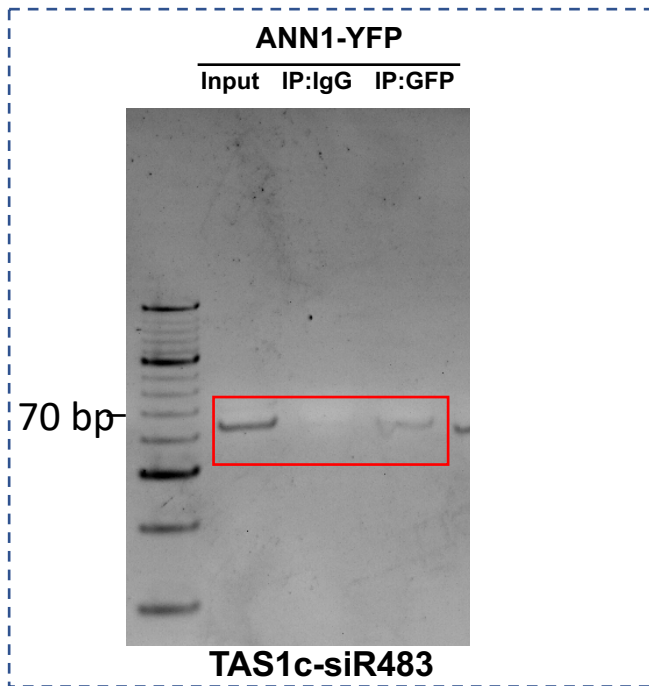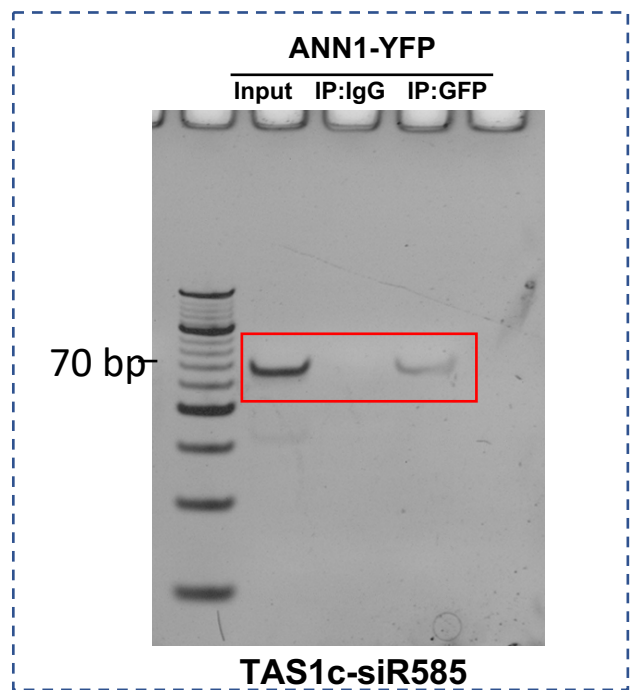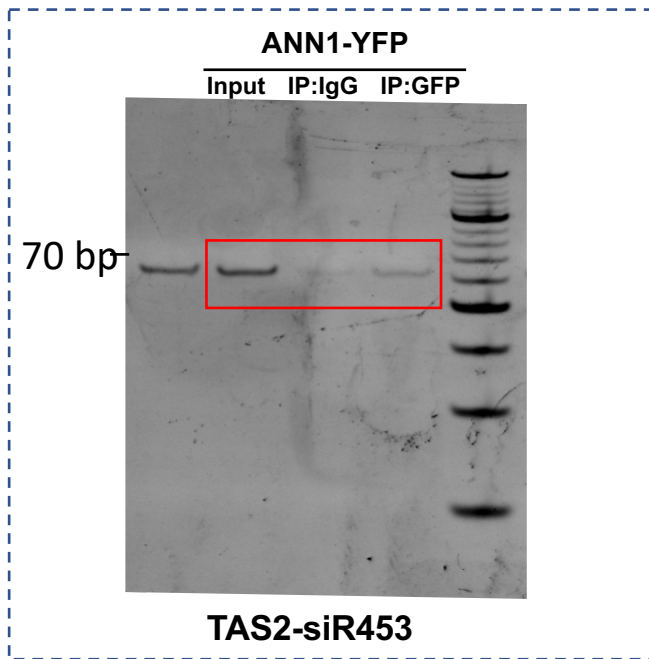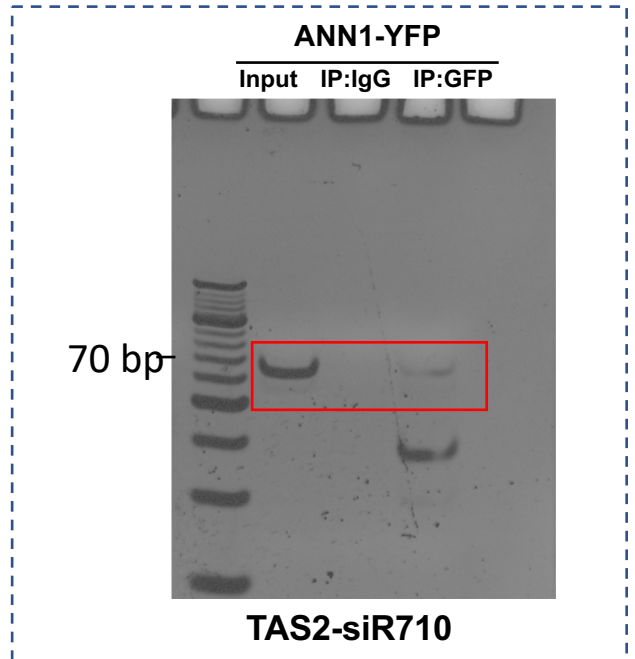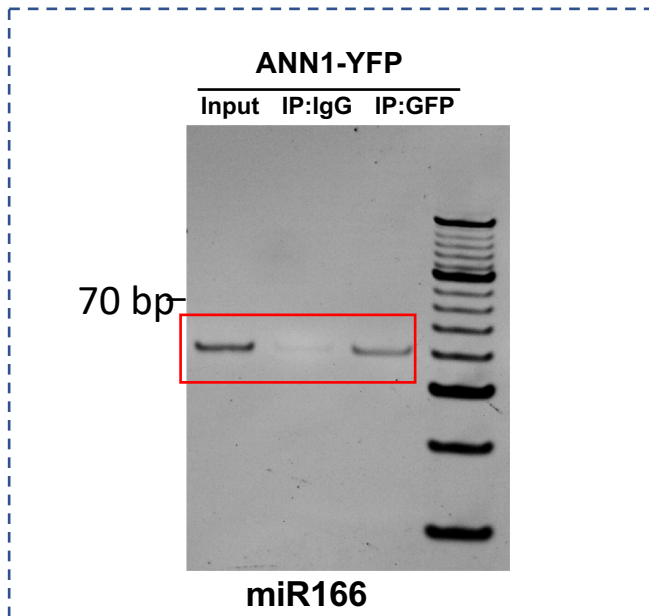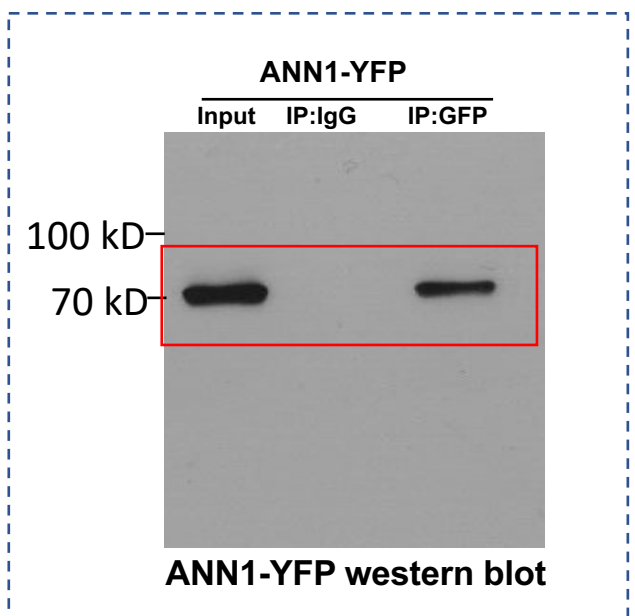

Figure 5a

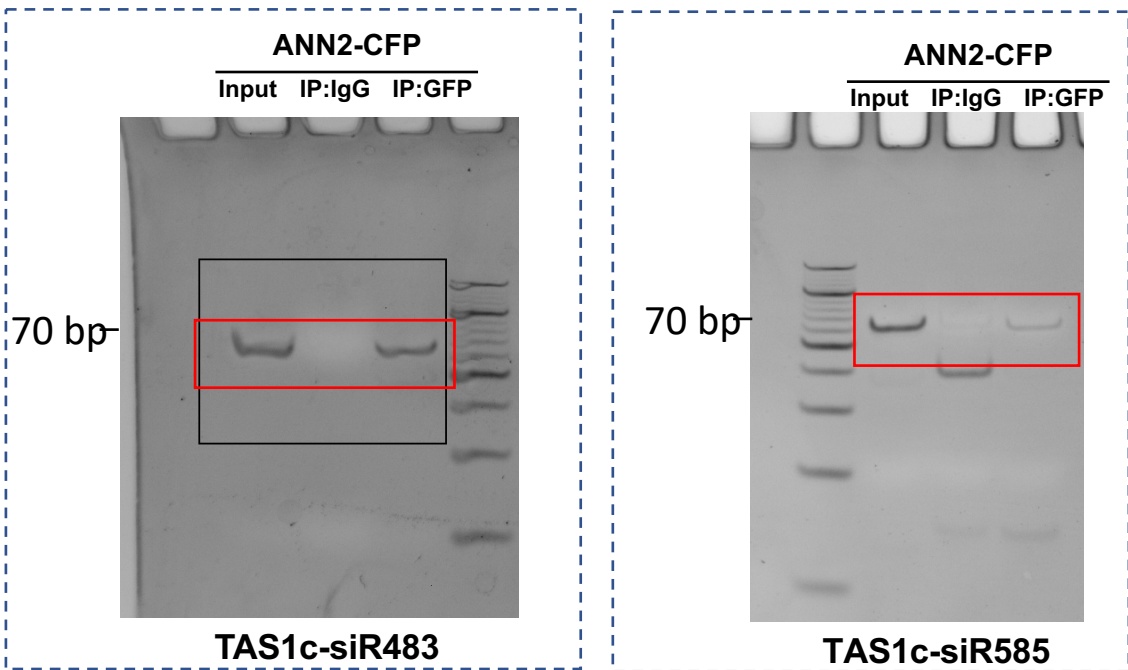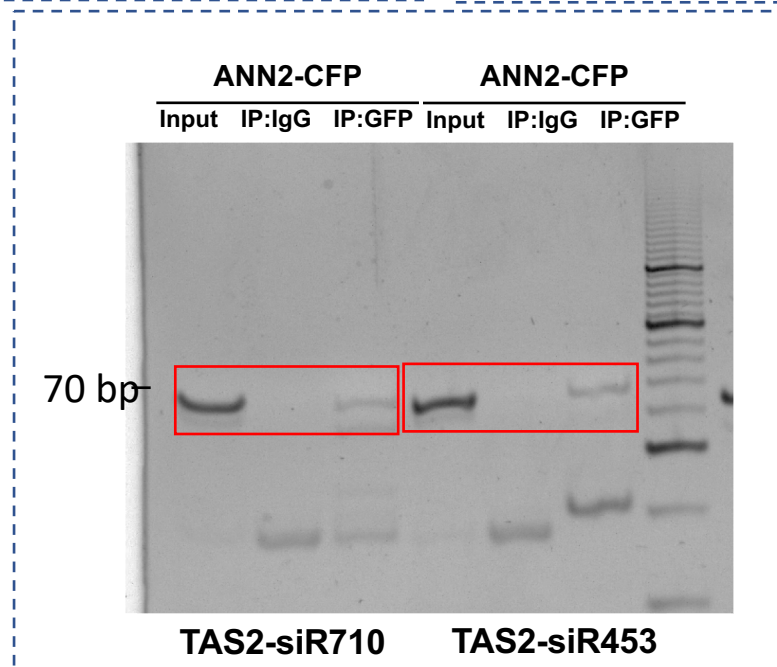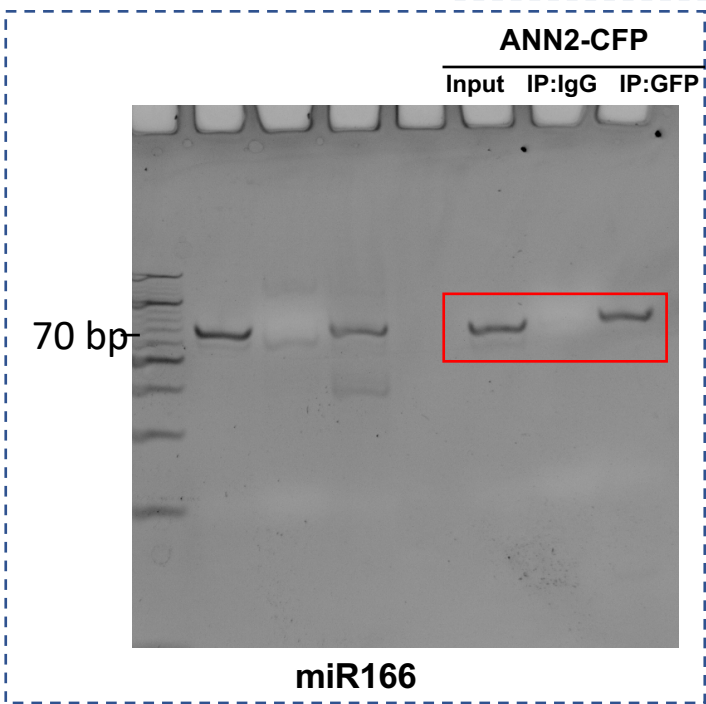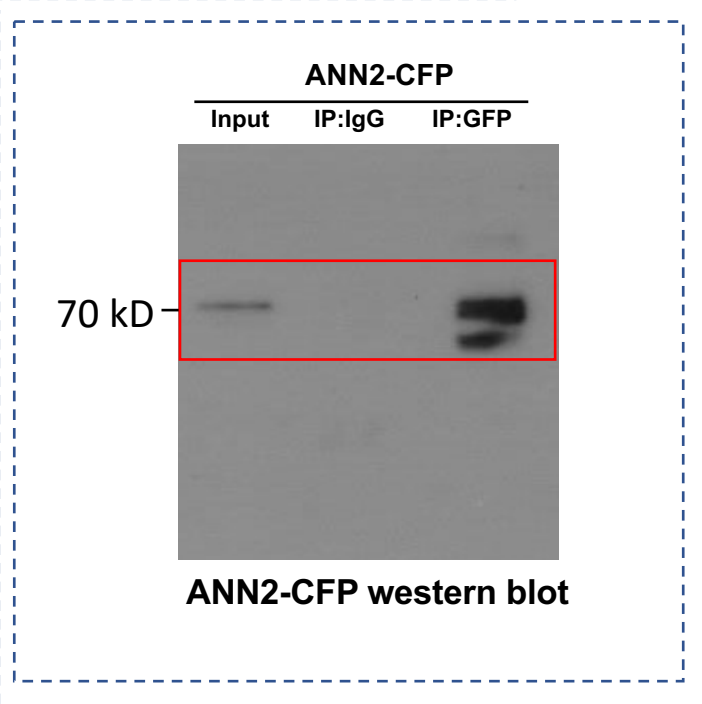

Figure 5b

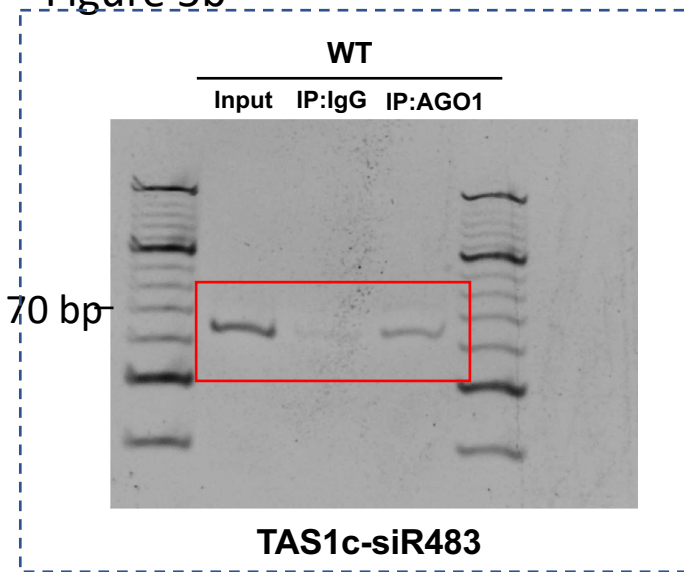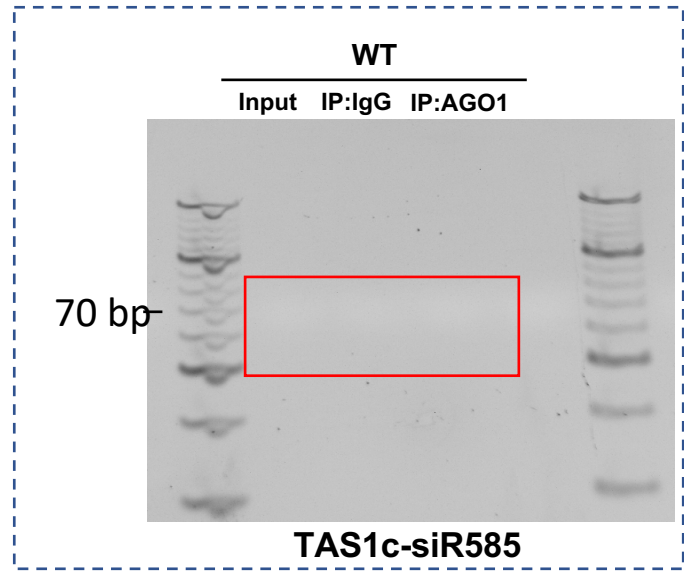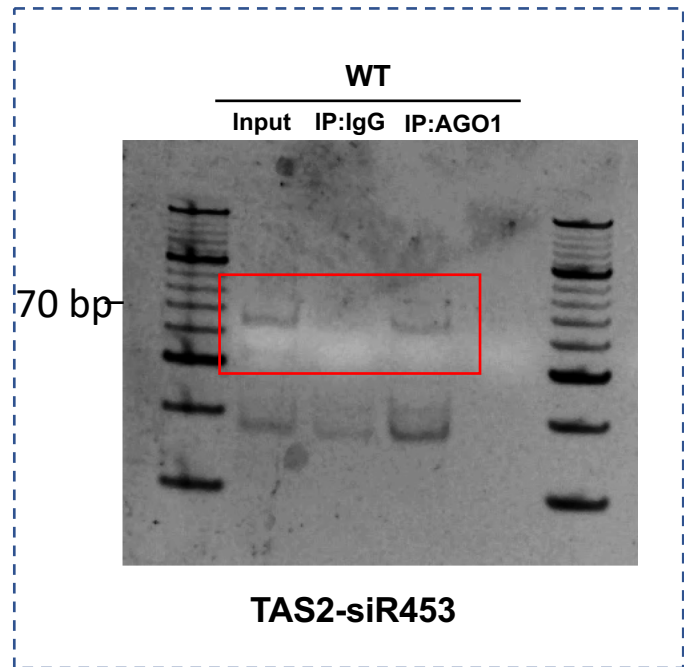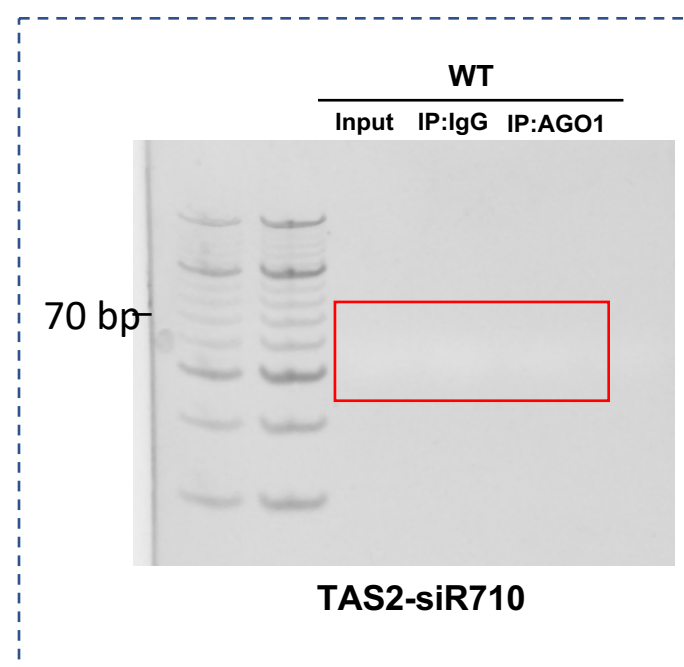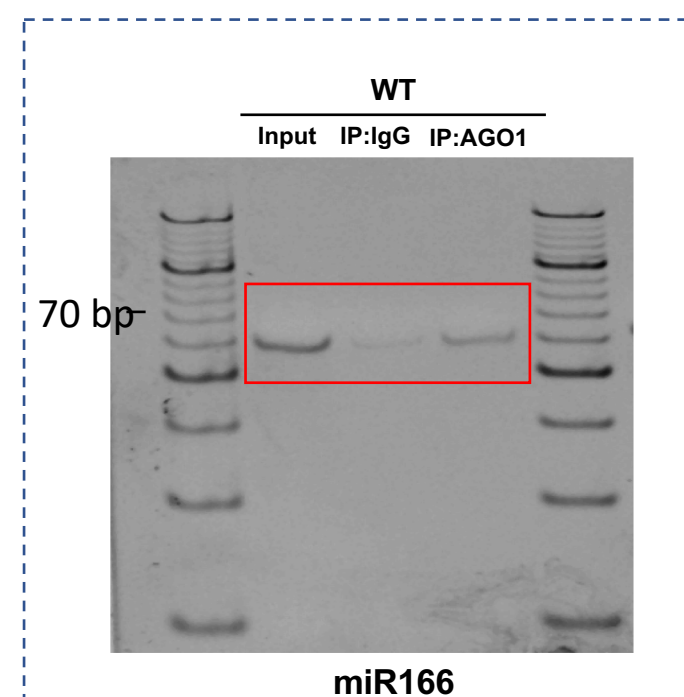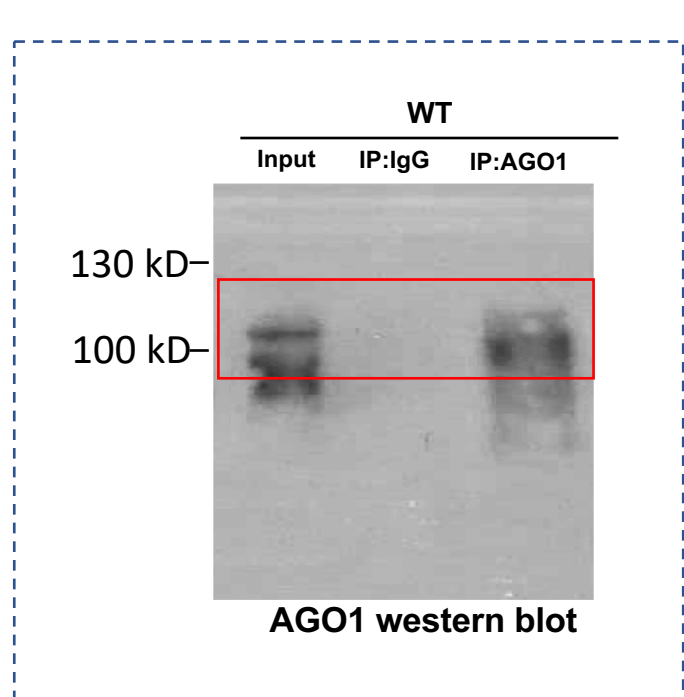

Figure 5b

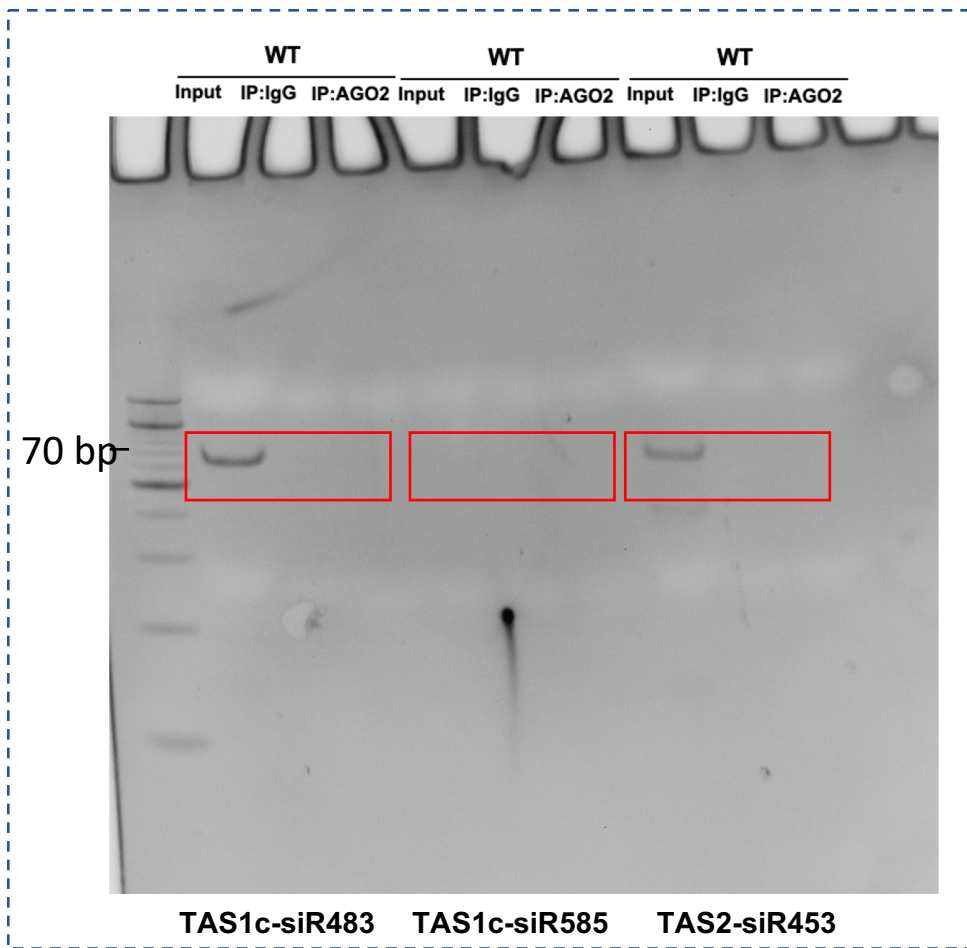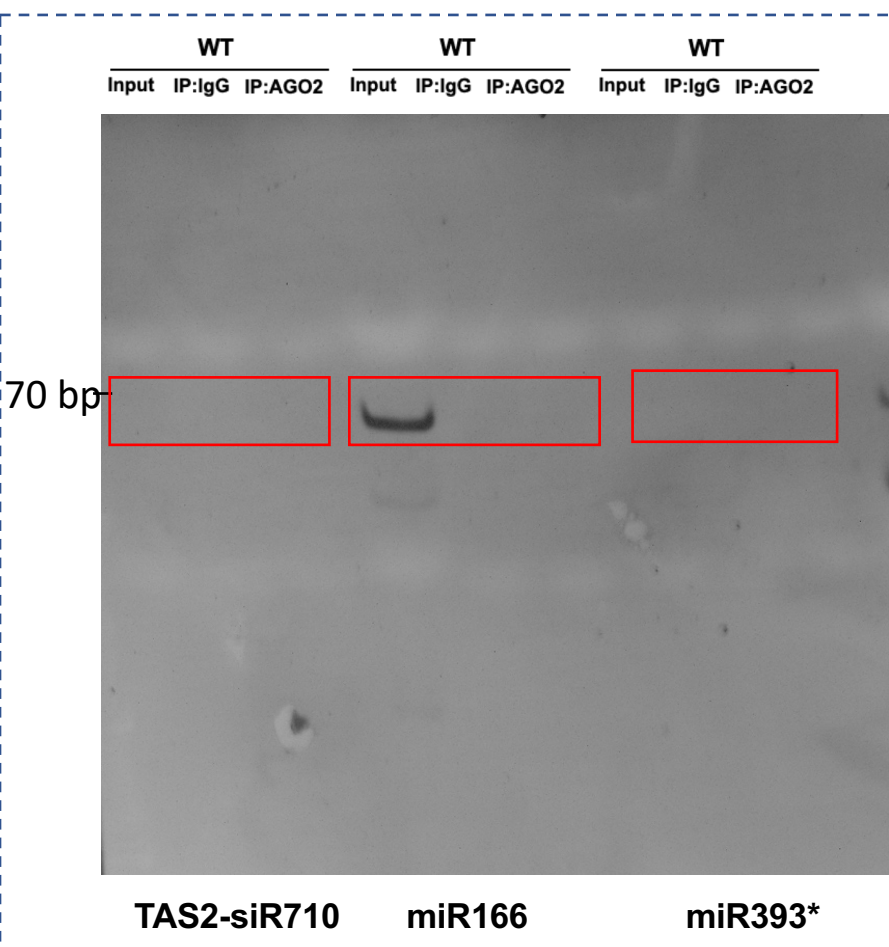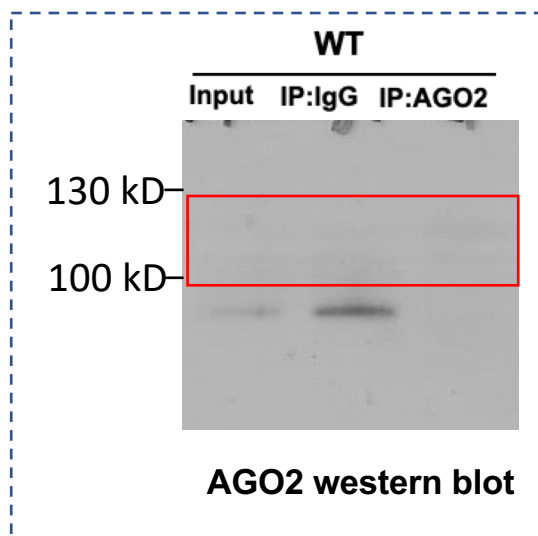



Figure 5b

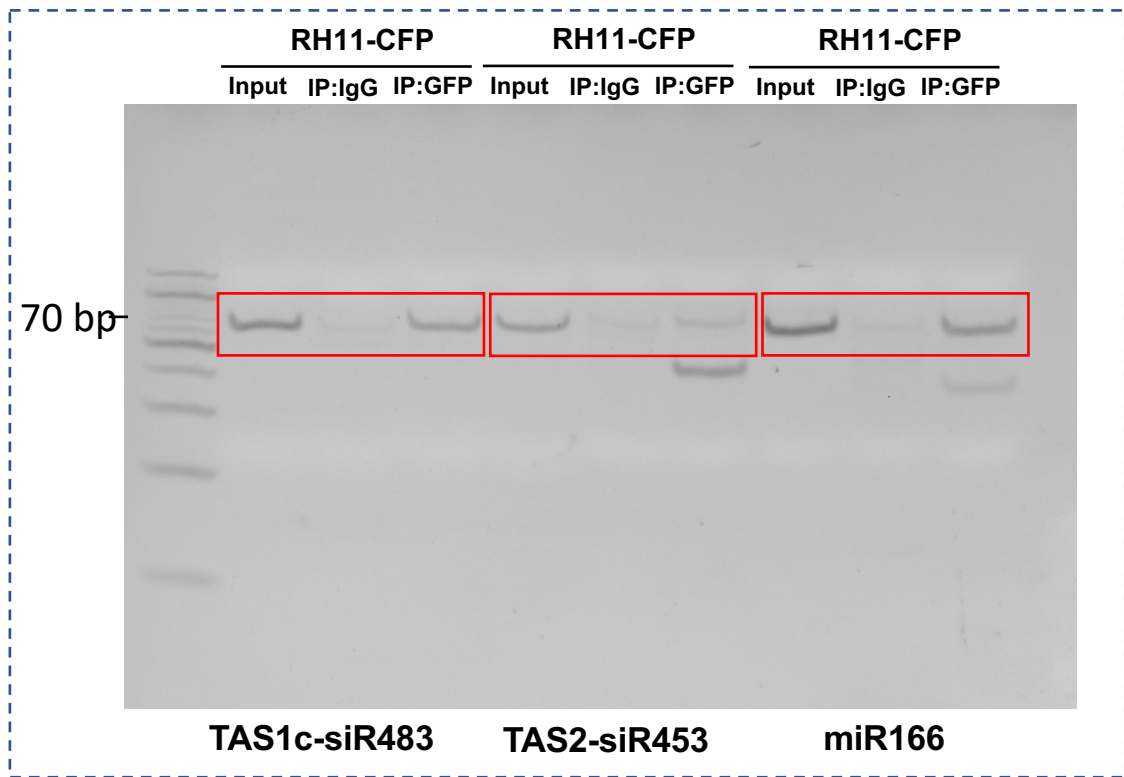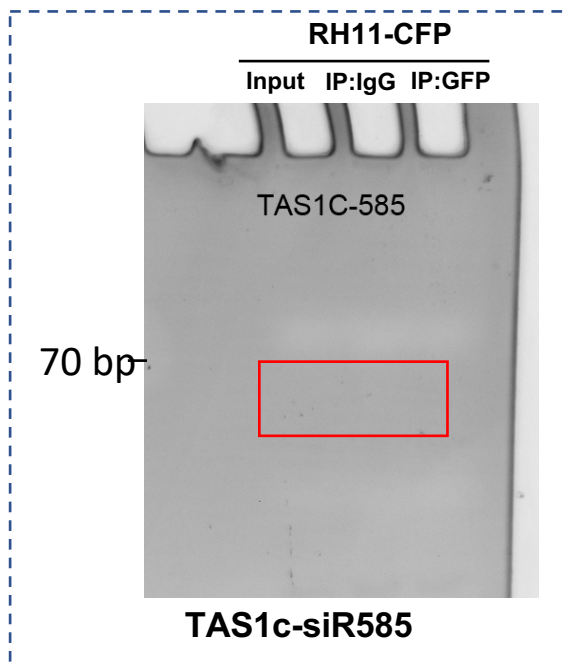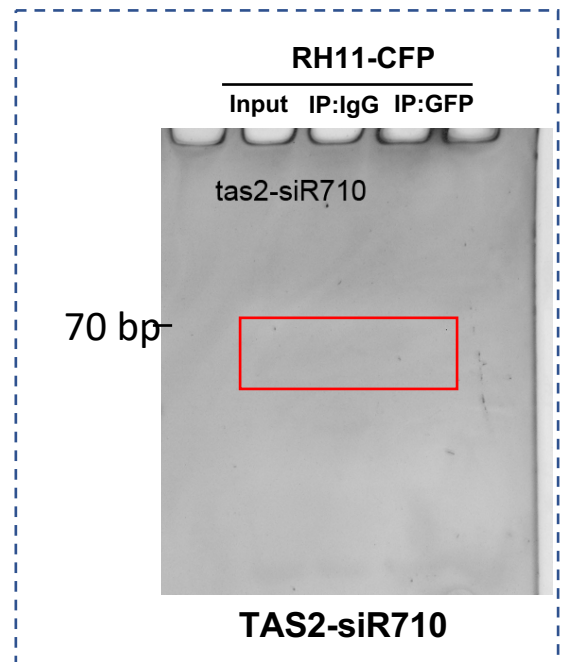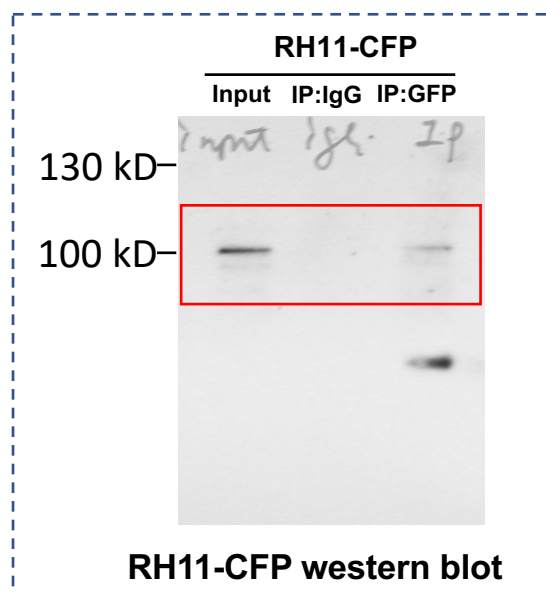

Figure 5b

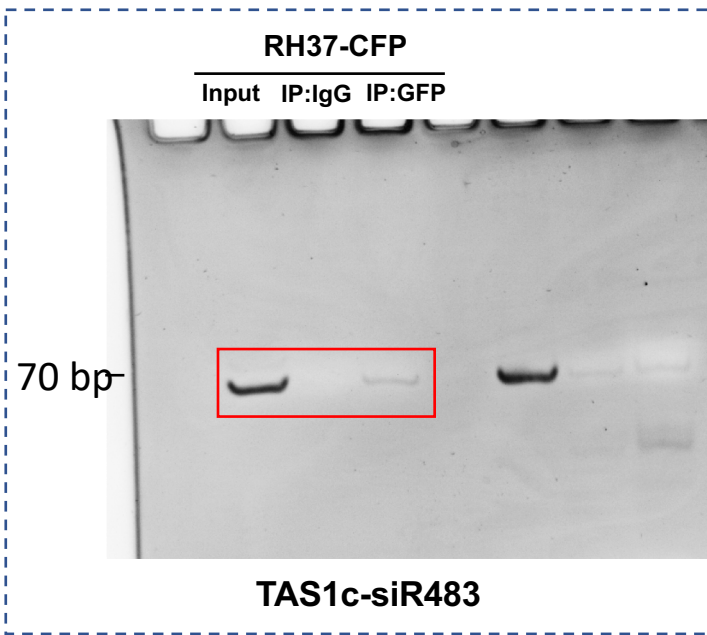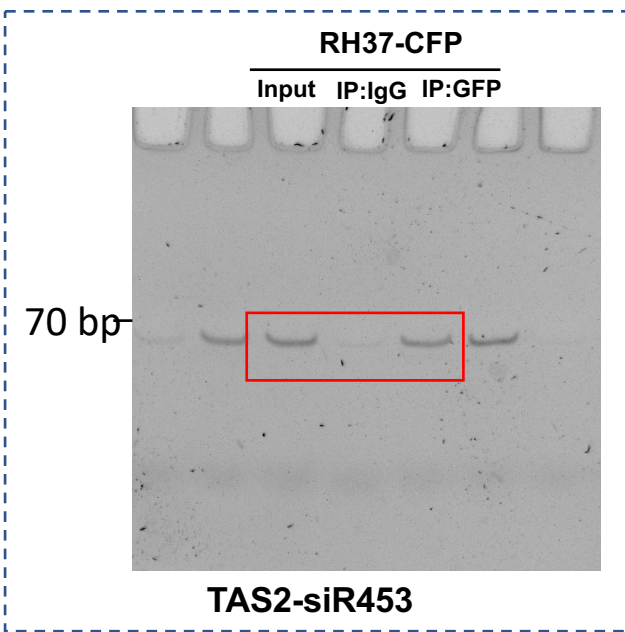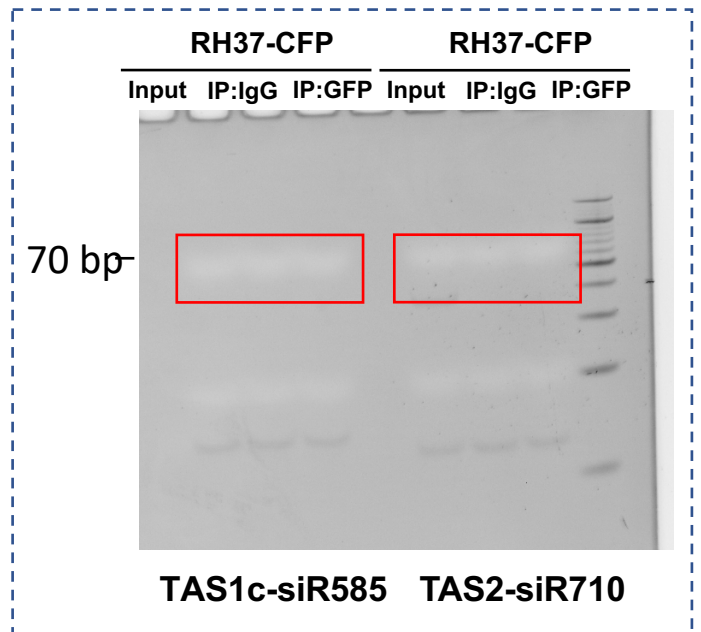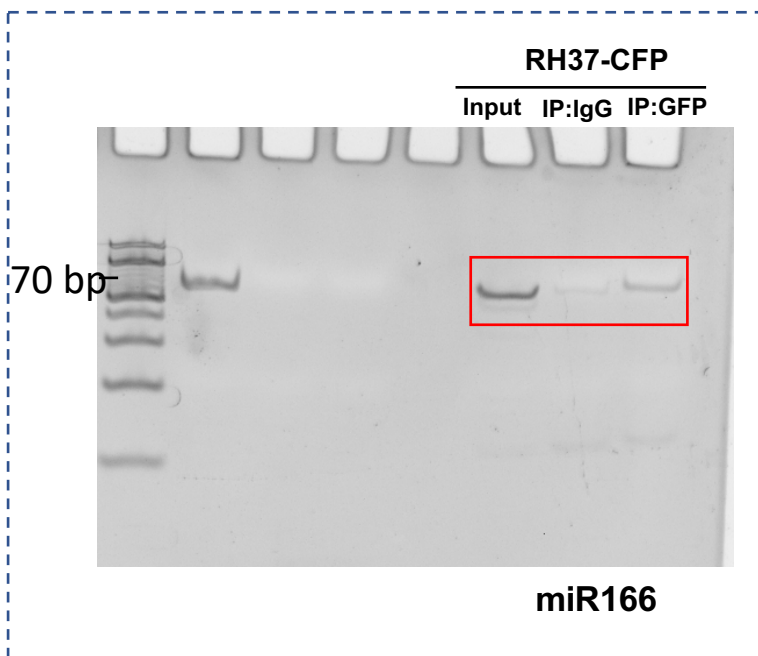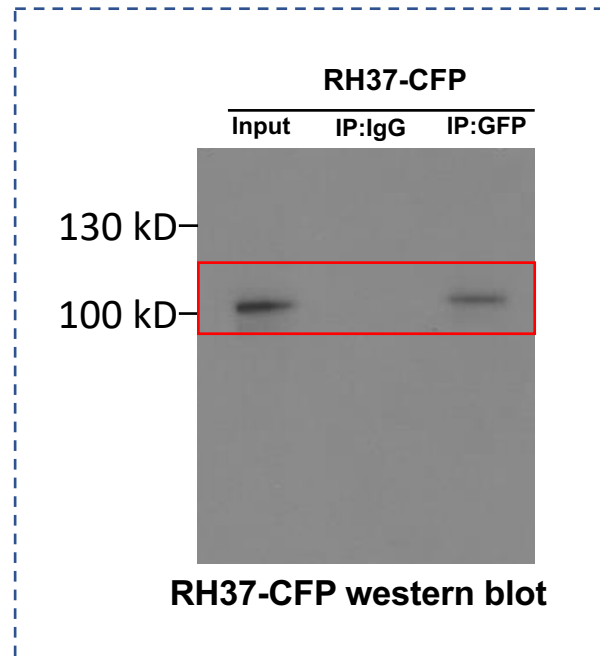

Figure 5b

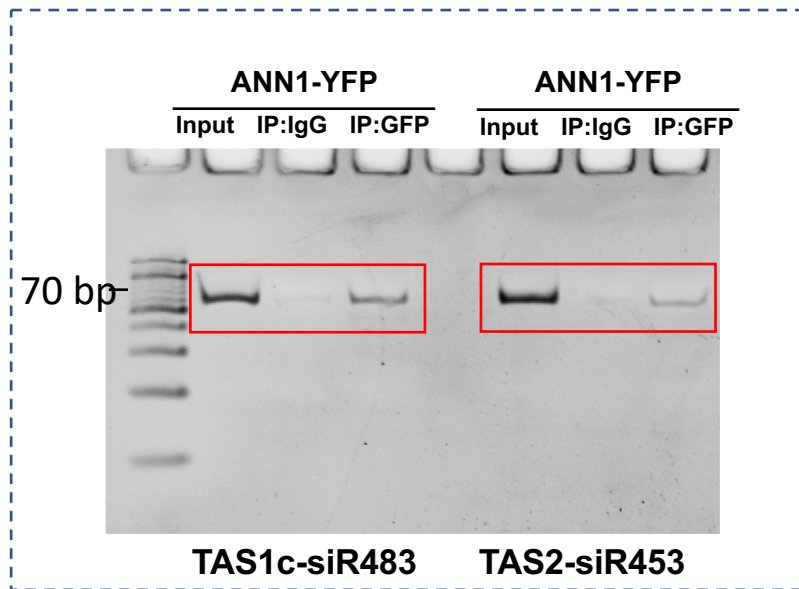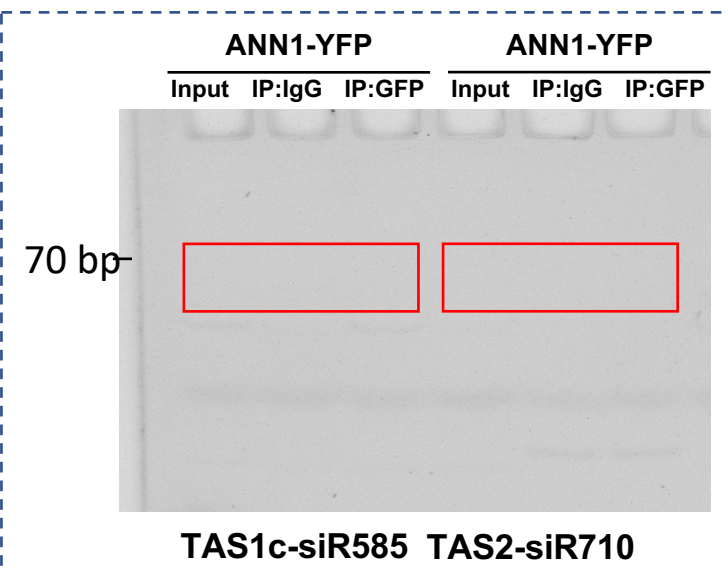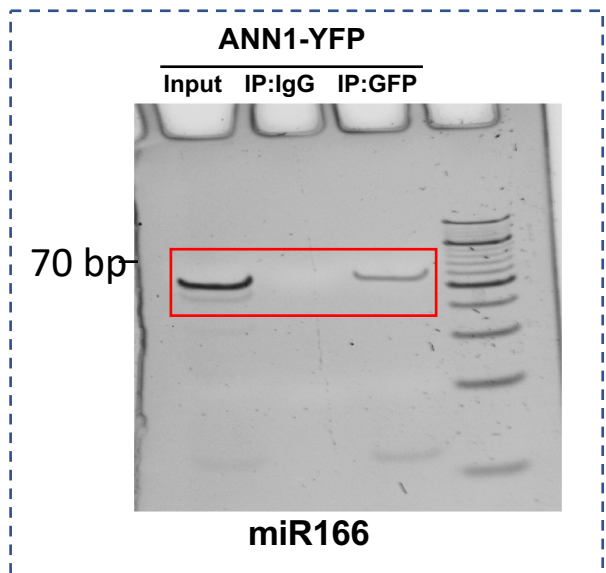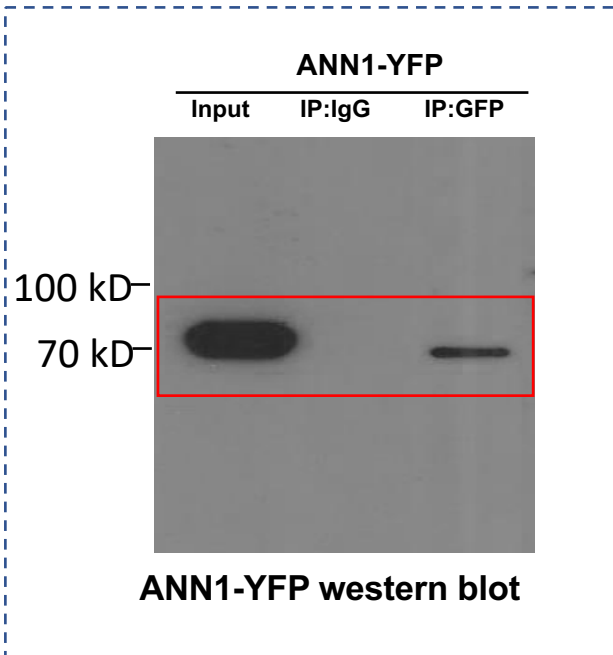

Figure 5b

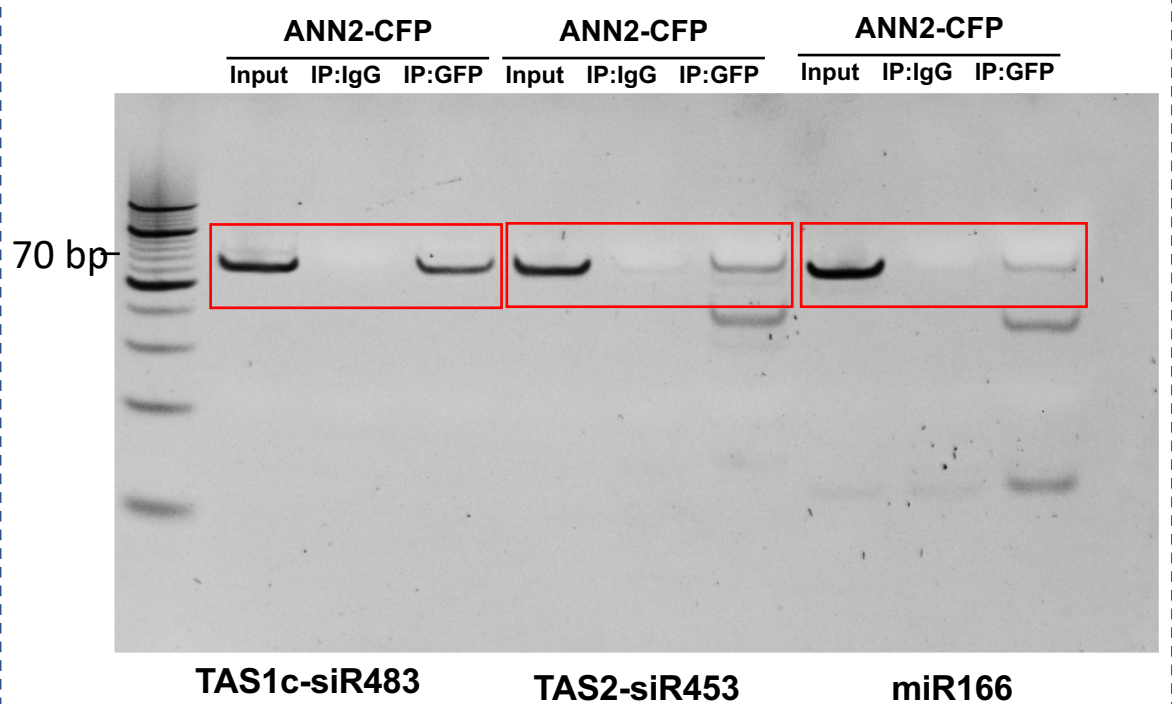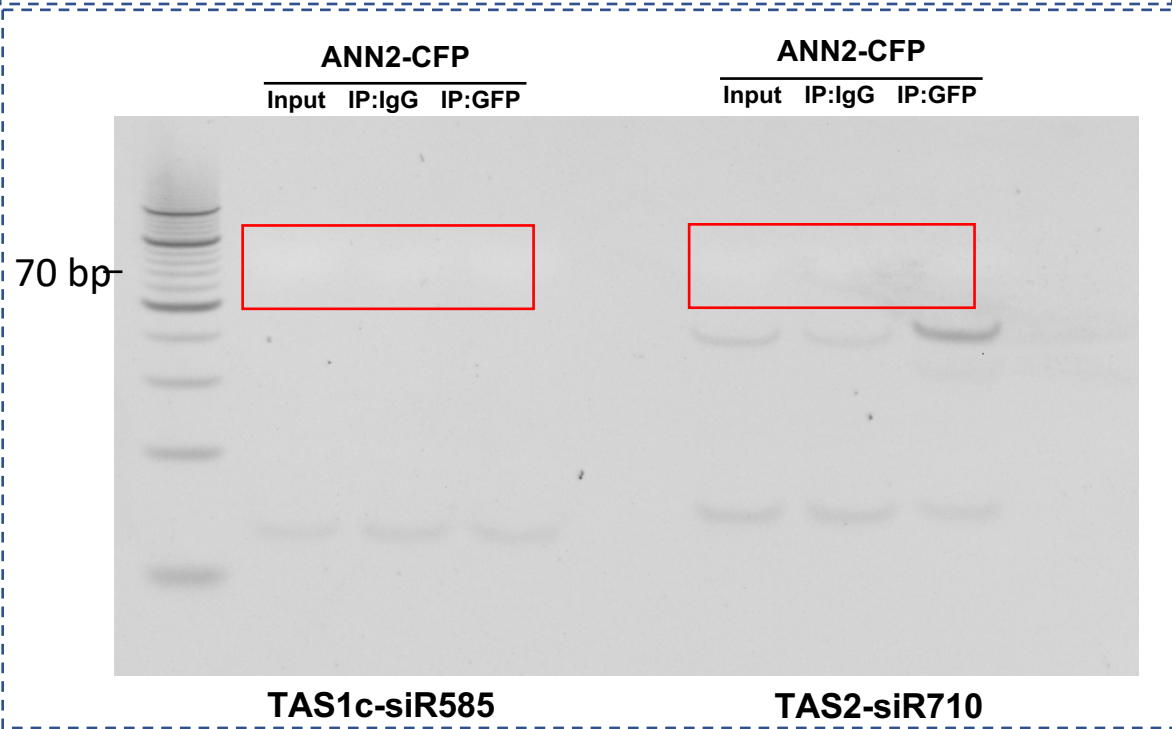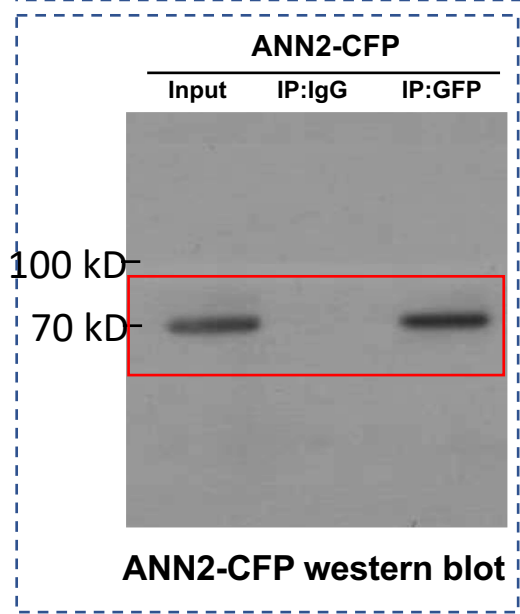

Supplement: NIHMS1667199-supplement-1667199_SourceData_Fig5.pdf [file NIHMS1667199-supplement-1667199_SourceData_Fig5.pdf]
