# Supplementary material
Source: PubMed Central journal article supplement (PMC7979528)
Supplement: NIHMS1667199-supplement-1667199_SourceData_ExtData_Fig4.pdf [file NIHMS1667199-supplement-1667199_SourceData_ExtData_Fig4.pdf]

# Extended Data Fig 4

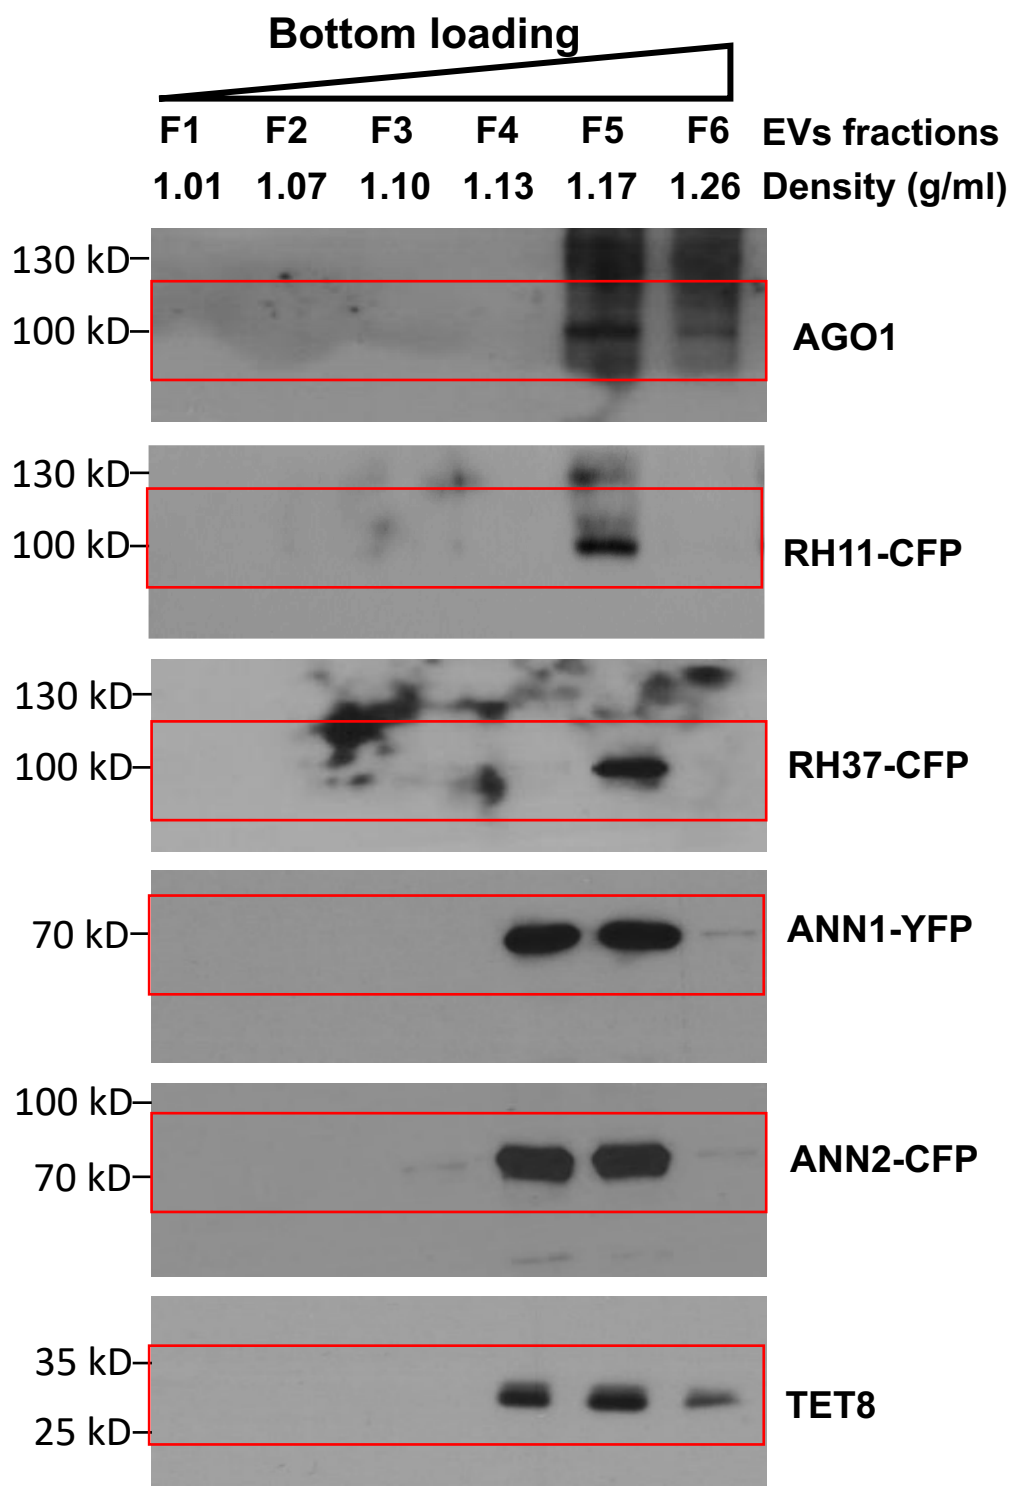

### Bottom loading

F1 F2 F3 F4 F5 F6 EVs fractions  
1.01 1.07 1.10 1.13 1.17 1.26 Density (g/ml)

70 bp

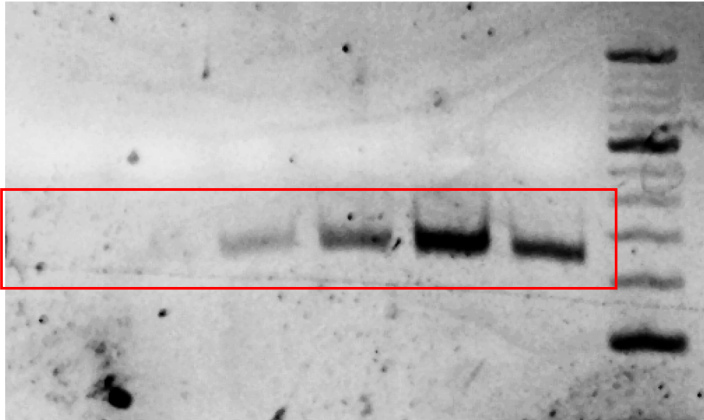

TAS1c-siR483

### Bottom loading

F1 F2 F3 F4 F5 F6 EVs fractions  
1.01 1.07 1.10 1.13 1.17 1.26 Density (g/ml)

70 bp

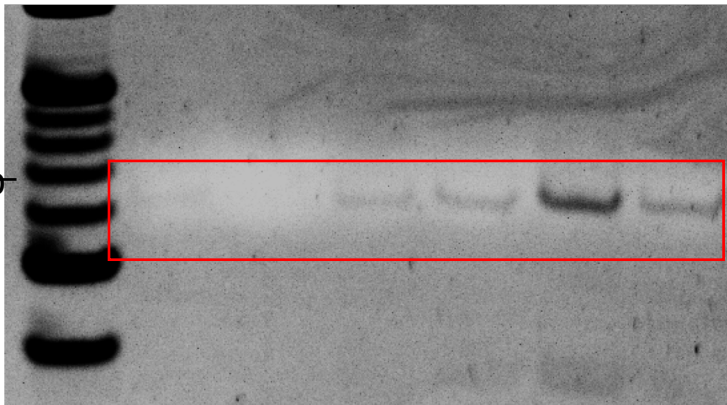

TAS2-siR453

### Bottom loading

F1 F2 F3 F4 F5 F6 EVs fractions  
1.01 1.07 1.10 1.13 1.17 1.26 Density (g/ml)

70 bp

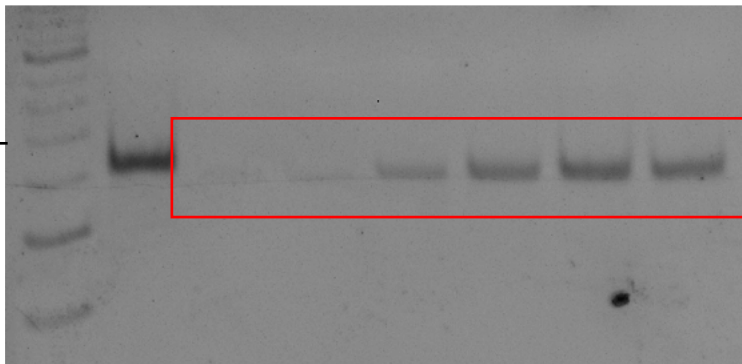

miRNA 166

**Bottom loading**

F1 F2 F3 F4 F5 F6 EVs fractions  
1.01 1.07 1.10 1.13 1.17 1.26 Density (g/ml)

70 bp

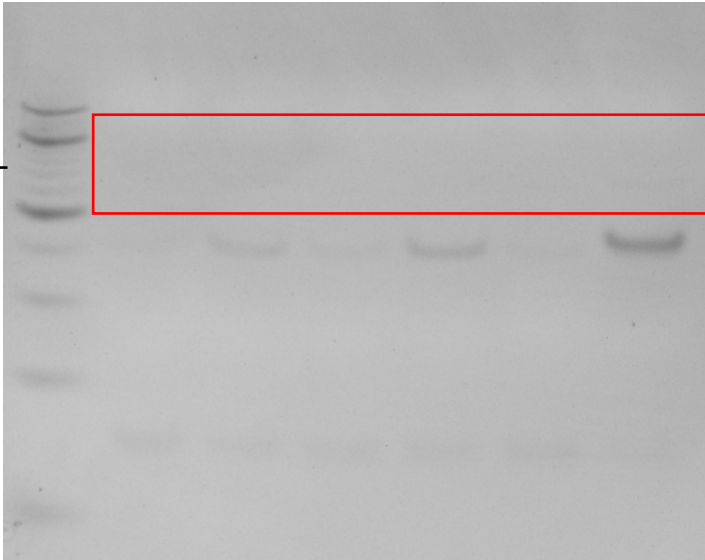

TAS1c-siR585

**Bottom loading**

F1 F2 F3 F4 F5 F6 EVs fractions  
1.01 1.07 1.10 1.13 1.17 1.26 Density (g/ml)

70 bp

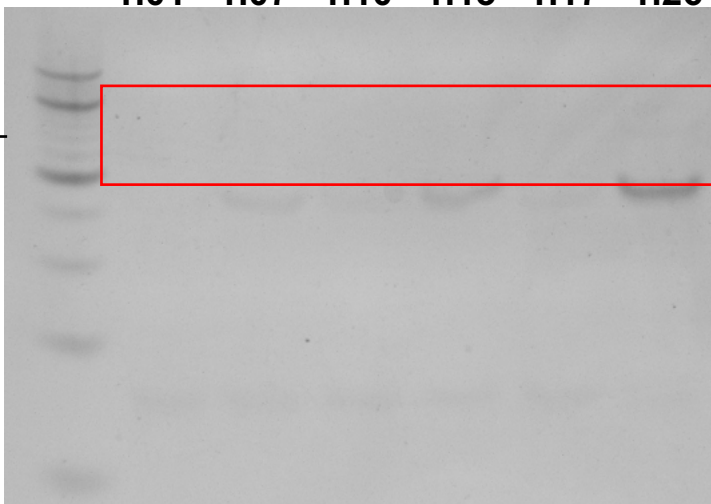

TAS2-siR710
