# Supplementary material
Source: PubMed Central journal article supplement (PMC7979528)
Supplement: NIHMS1667199-supplement-1667199_SourceData_ExtData_Fig7.pdf [file NIHMS1667199-supplement-1667199_SourceData_ExtData_Fig7.pdf]

# Extended Data Fig 7

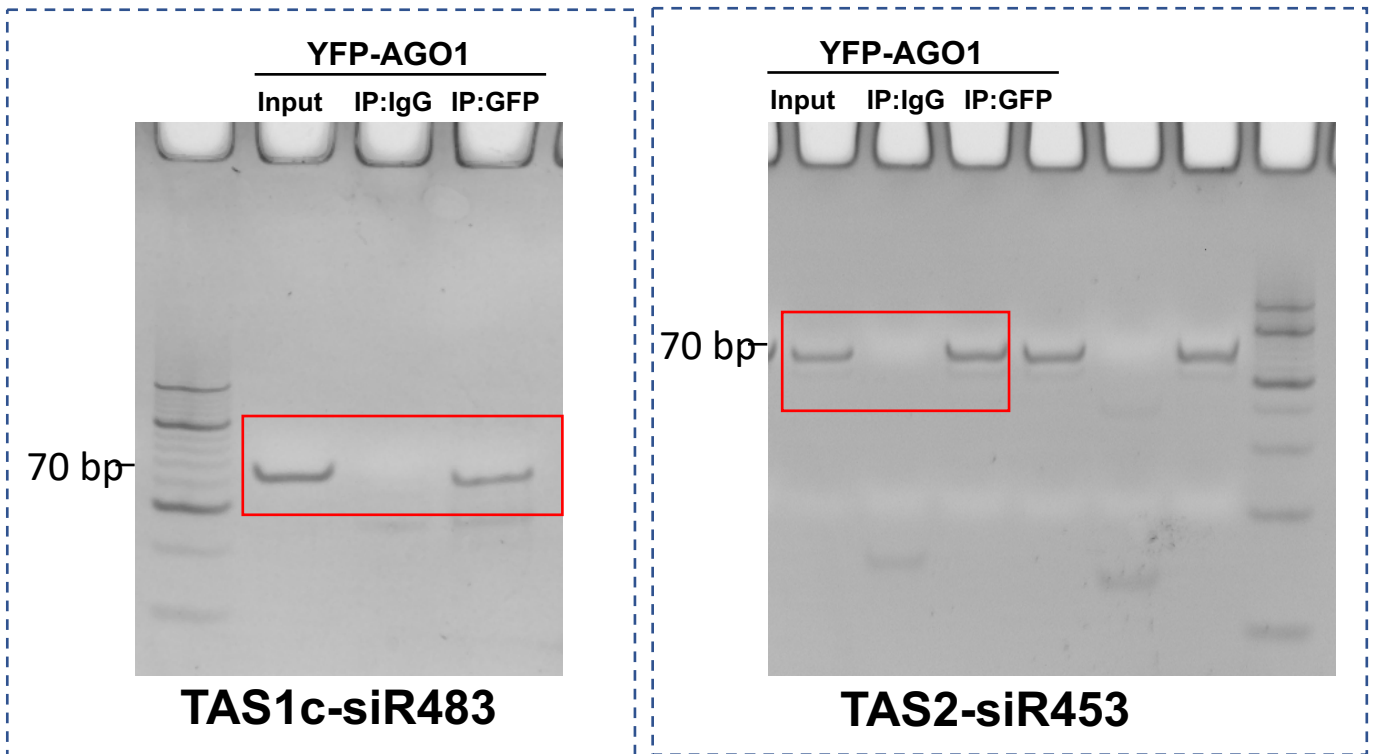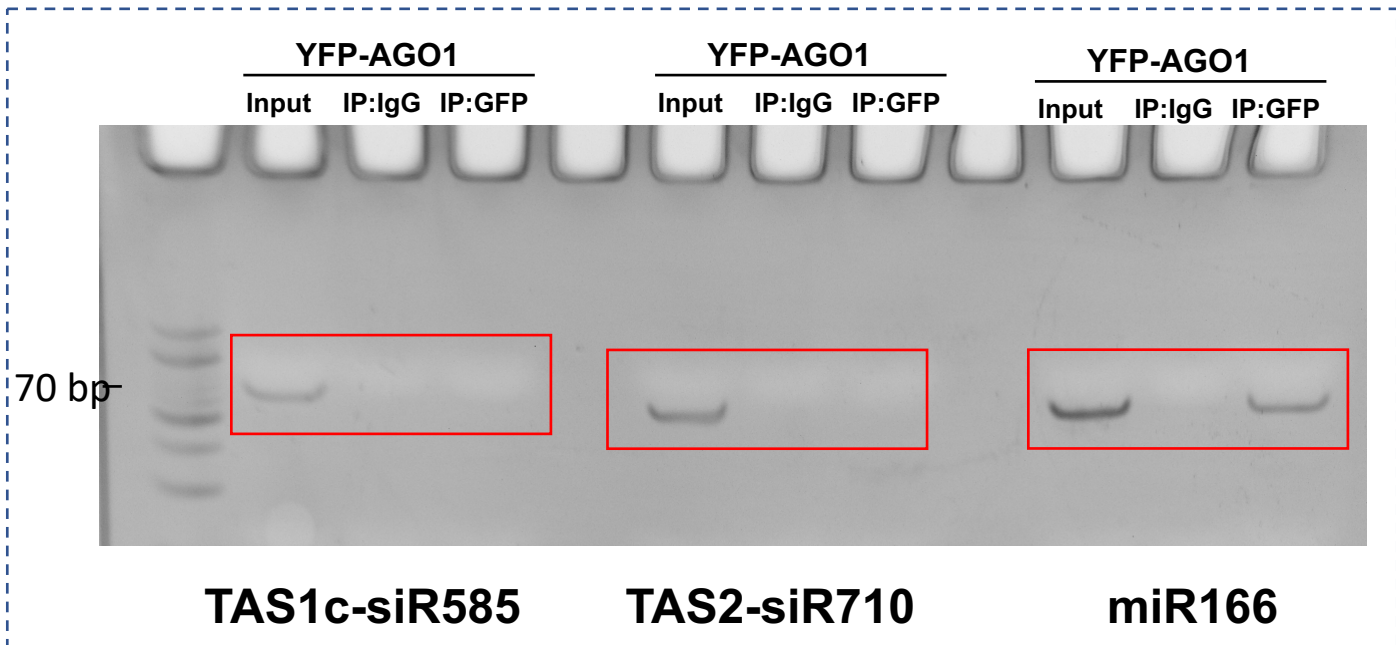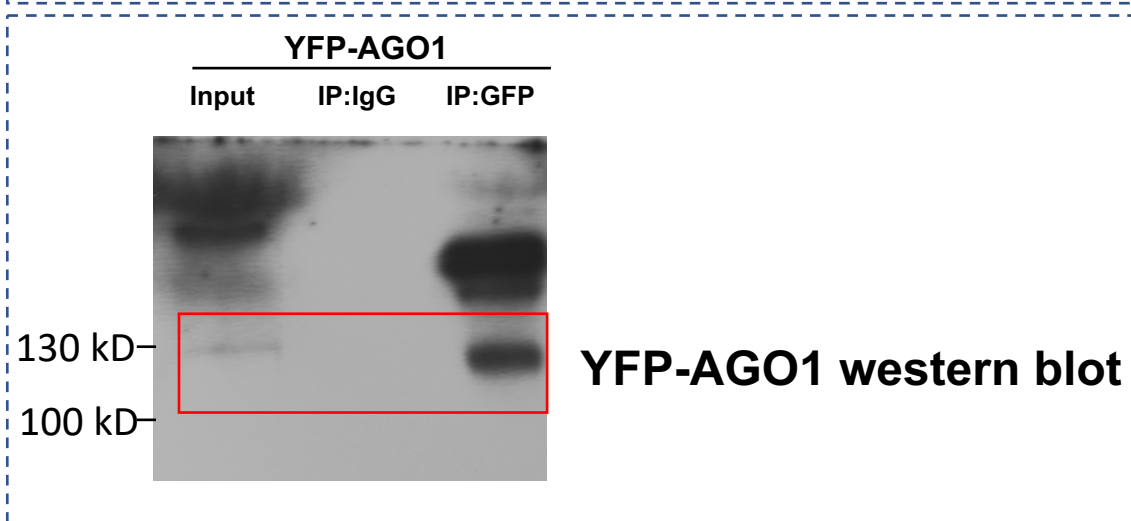

**RH37-CFP**

Input IP:IgG IP:GFP

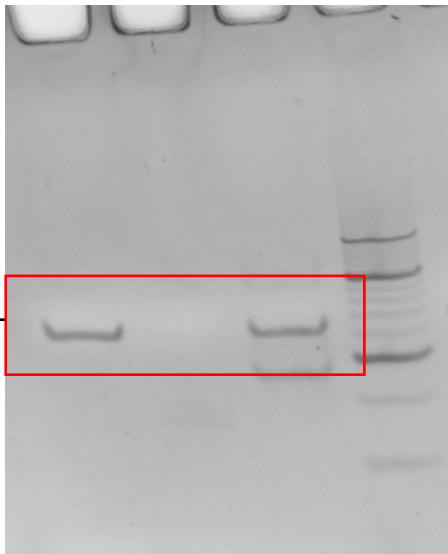

**TAS1c-siR483**

**RH37-CFP**

Input IP:IgG IP:GFP

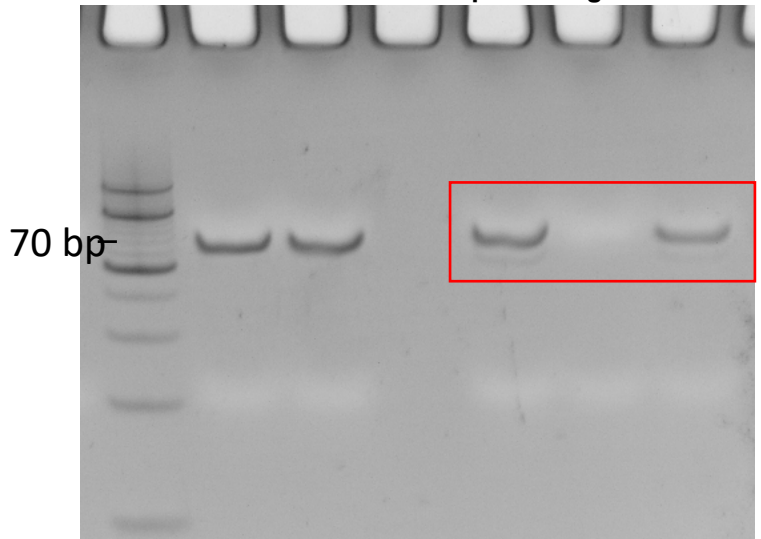

**TAS2-siR453**

**RH37-CFP**

Input IP:IgG IP:GFP

**RH37-CFP**

Input IP:IgG IP:GFP

**RH37-CFP**

Input IP:IgG IP:GFP

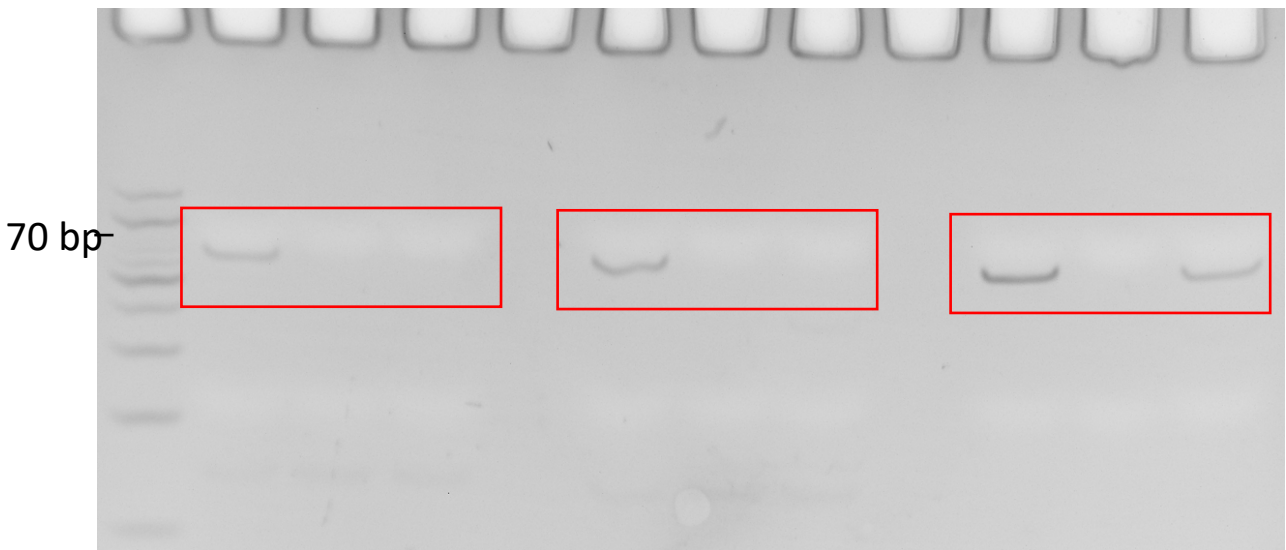

**TAS1c-siR585**

**TAS2-siR710**

**miR166**

**RH37-CFP**

Input IP:IgG IP:GFP

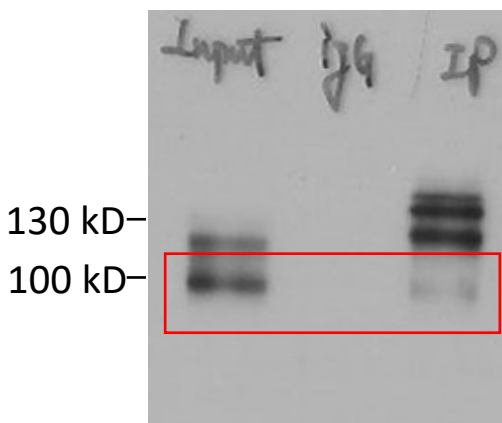

**RH37-CFP western blot**
