# Supplementary material
Source: PubMed Central journal article supplement (PMC7979528)

# Extended Data Fig 8d

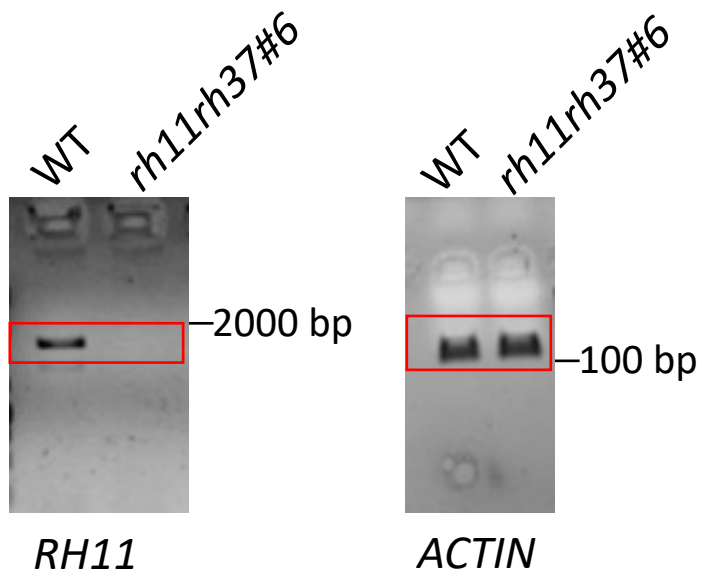

# Extended Data Fig 8f

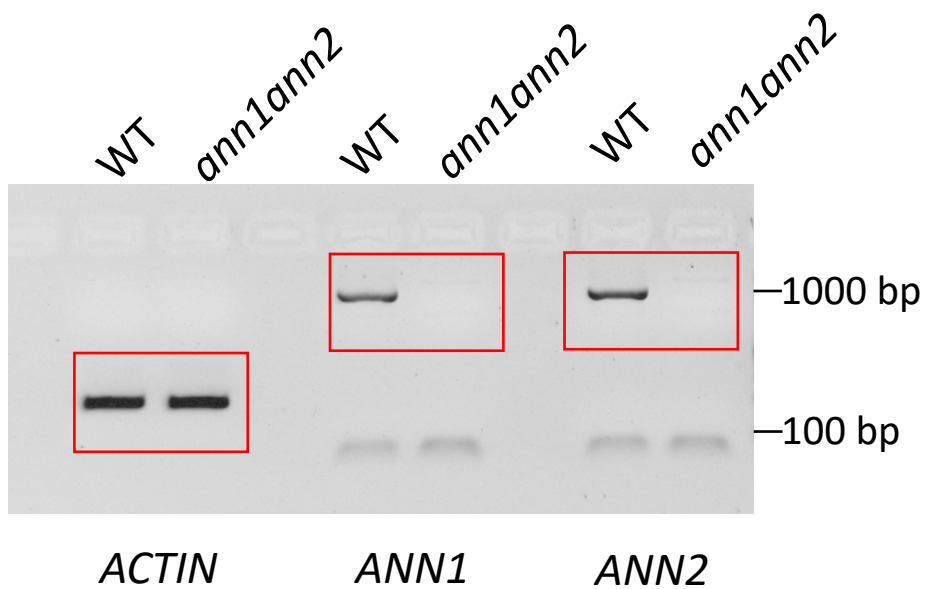

Supplement: NIHMS1667199-supplement-1667199_SourceData_ExtData_Fig8.pdf [file NIHMS1667199-supplement-1667199_SourceData_ExtData_Fig8.pdf]

Figure 1b

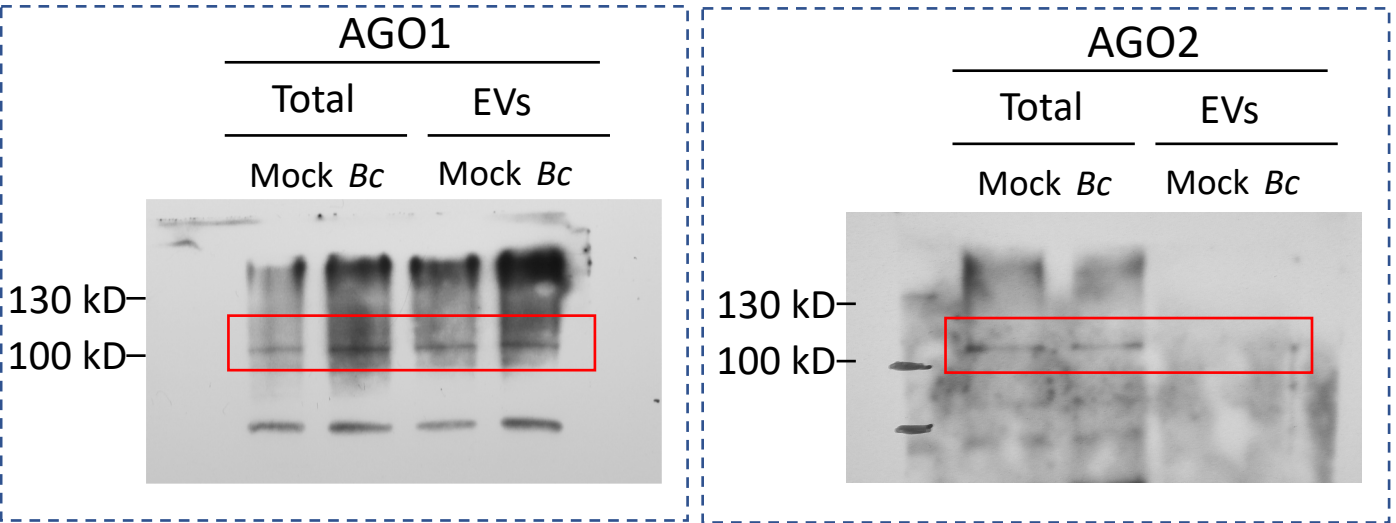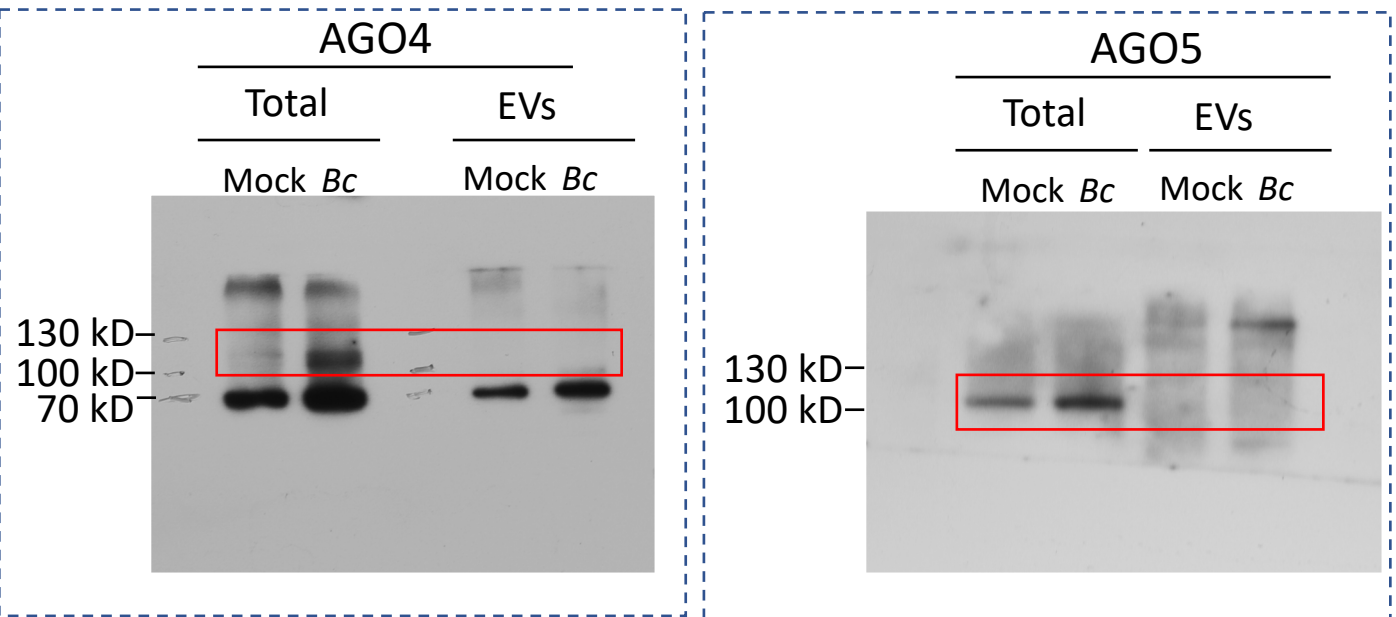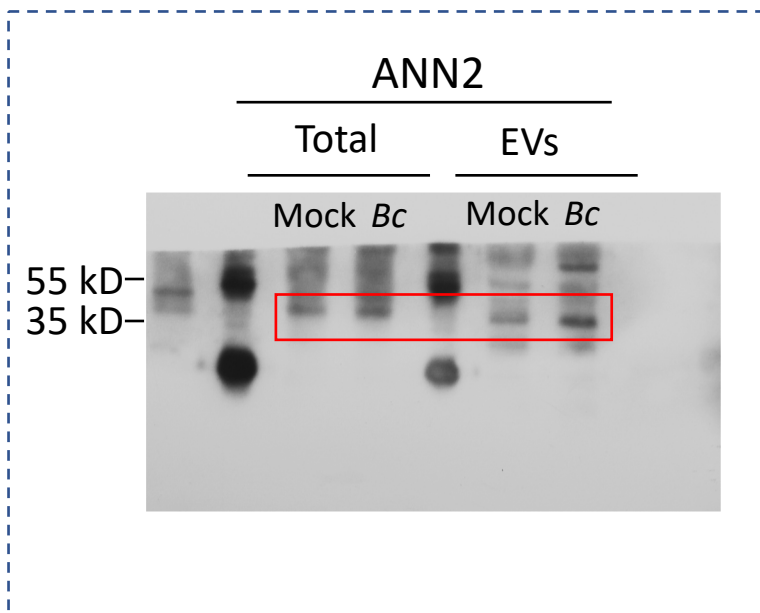

Figure 1b

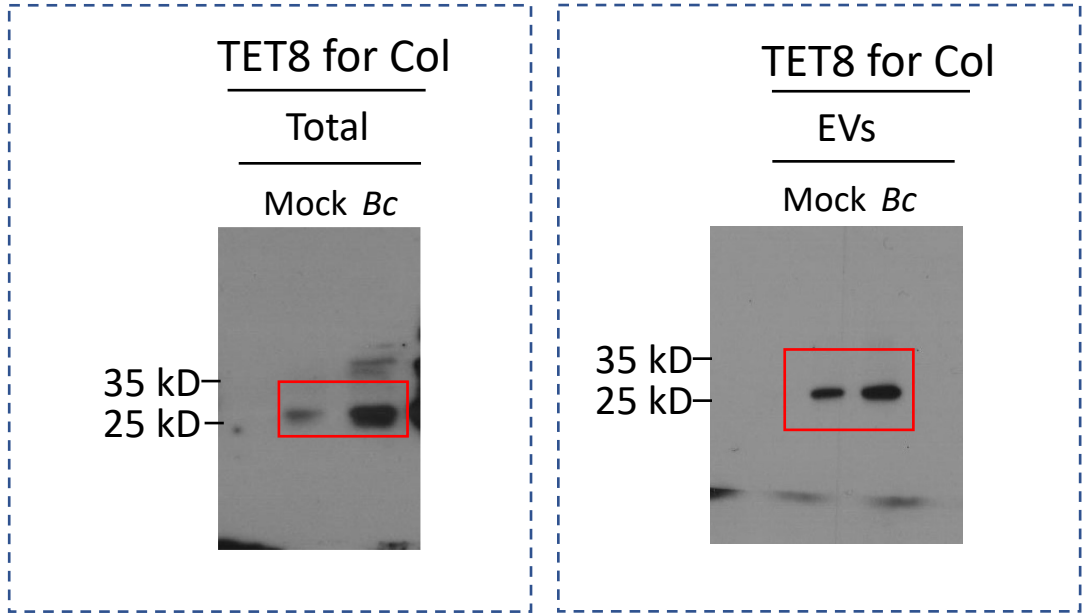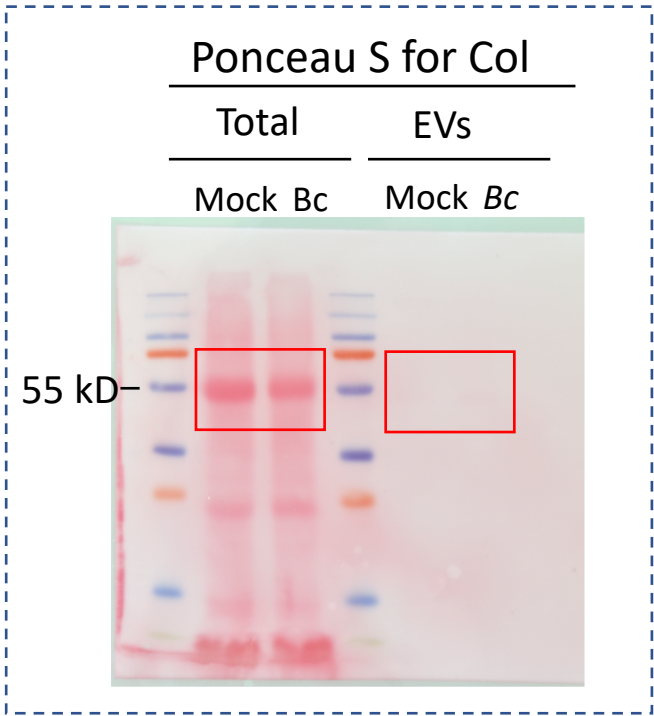

Figure 1b

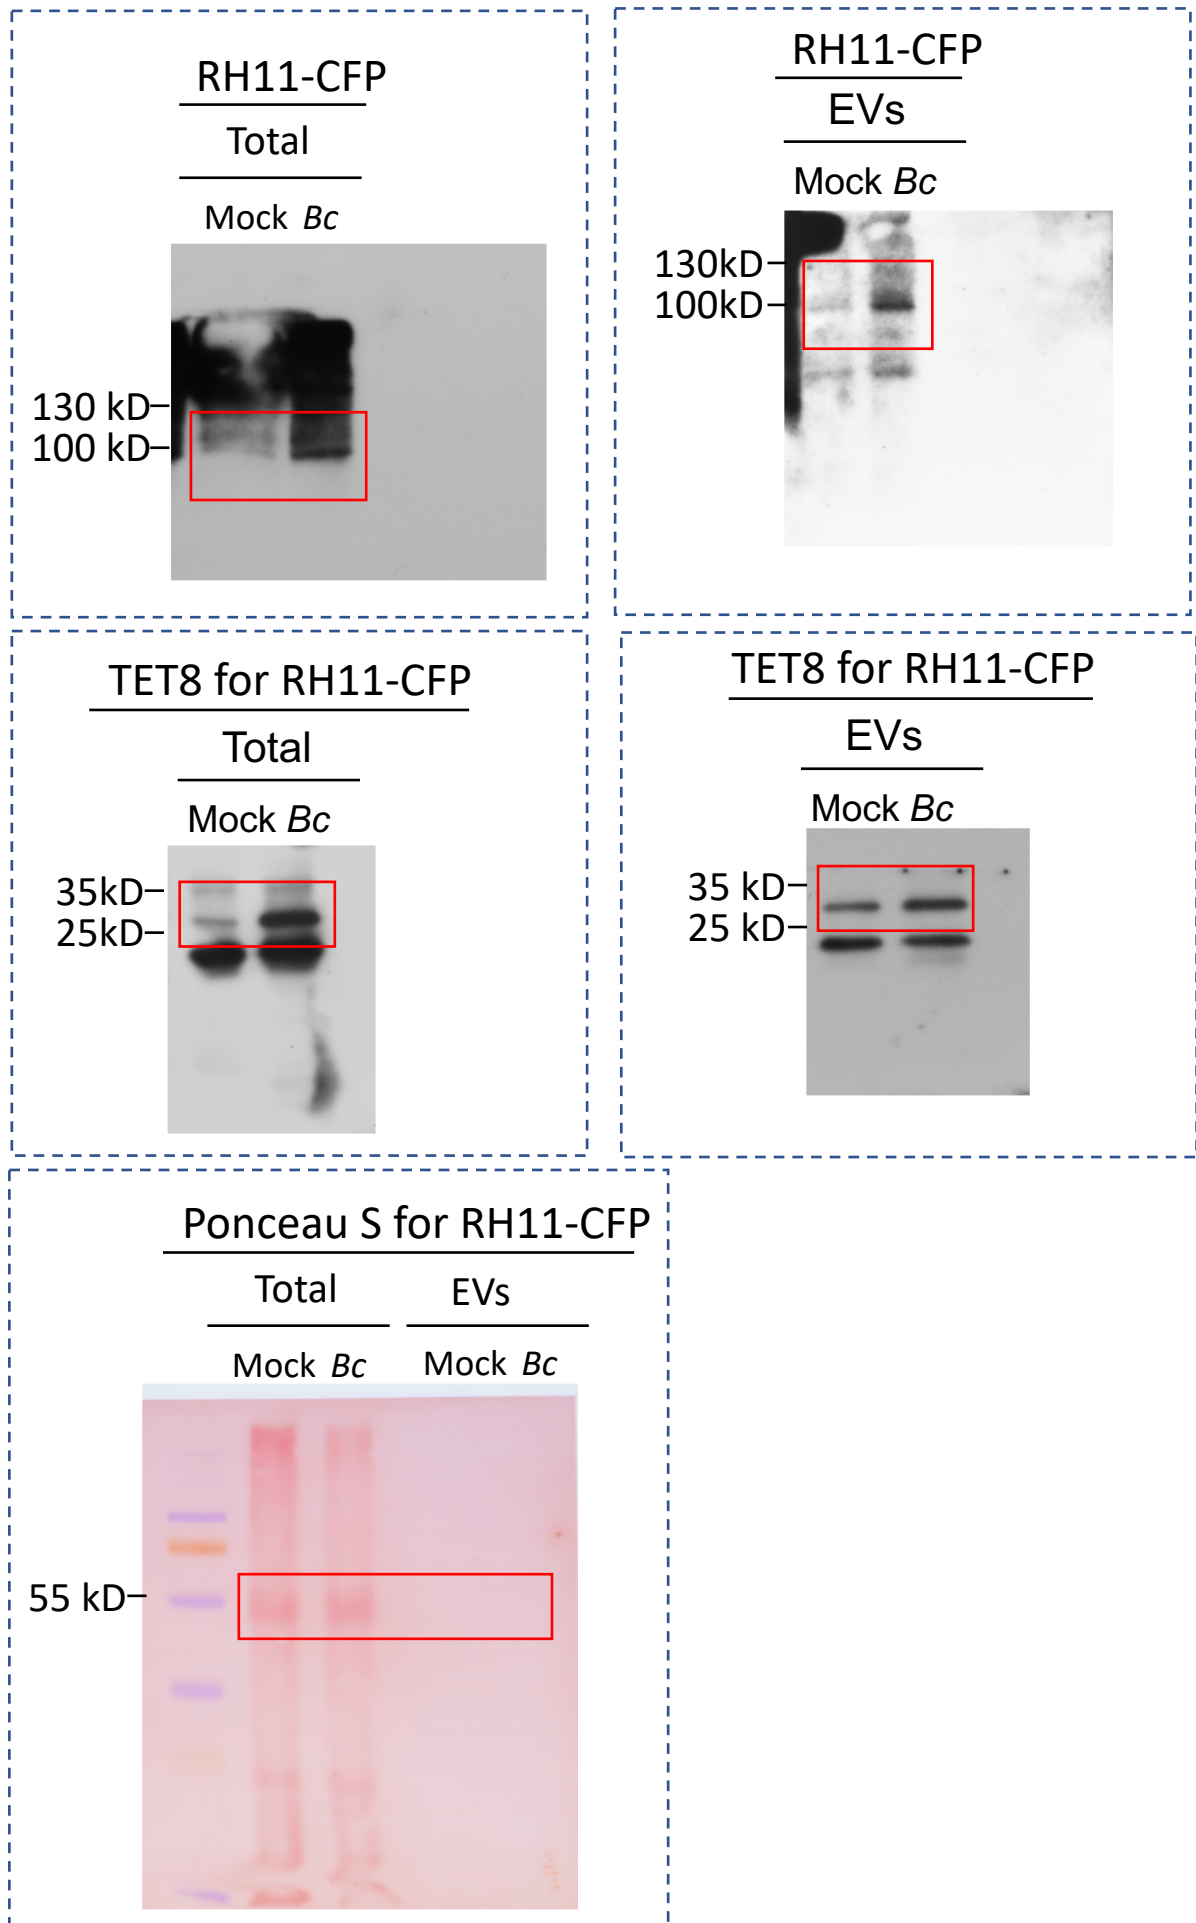

Figure 1b

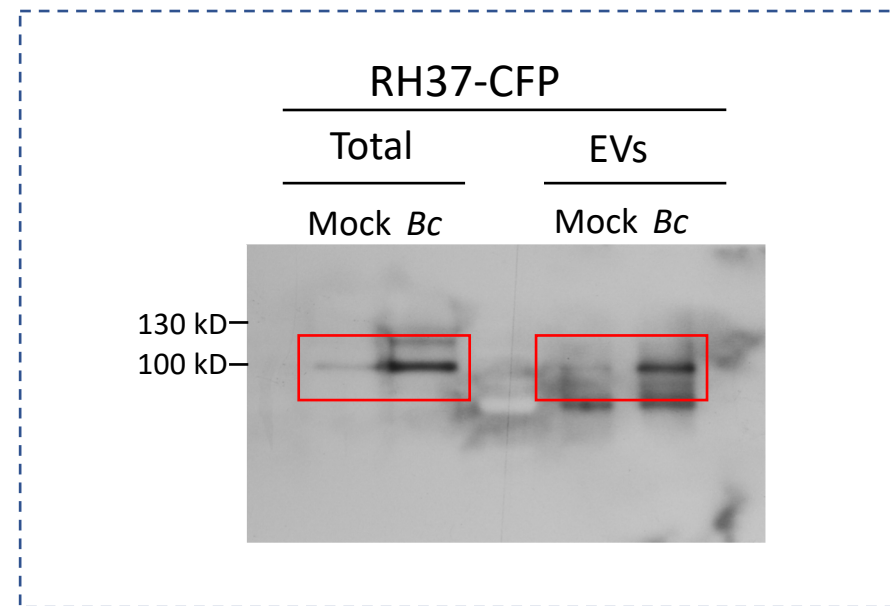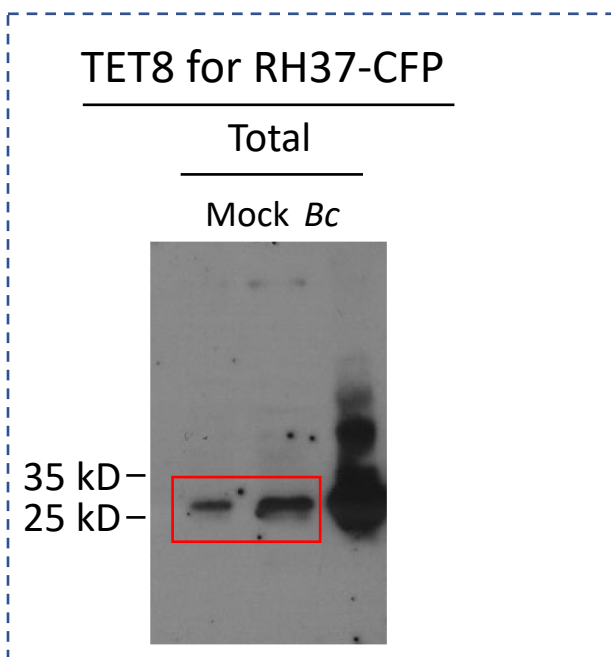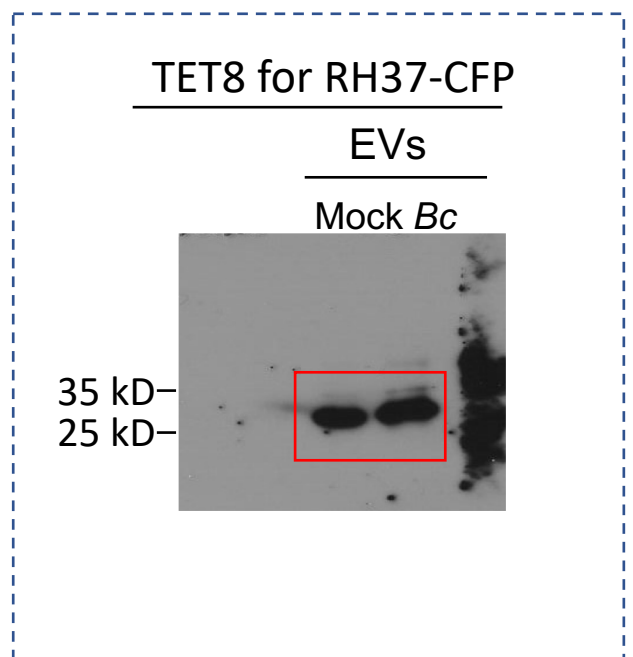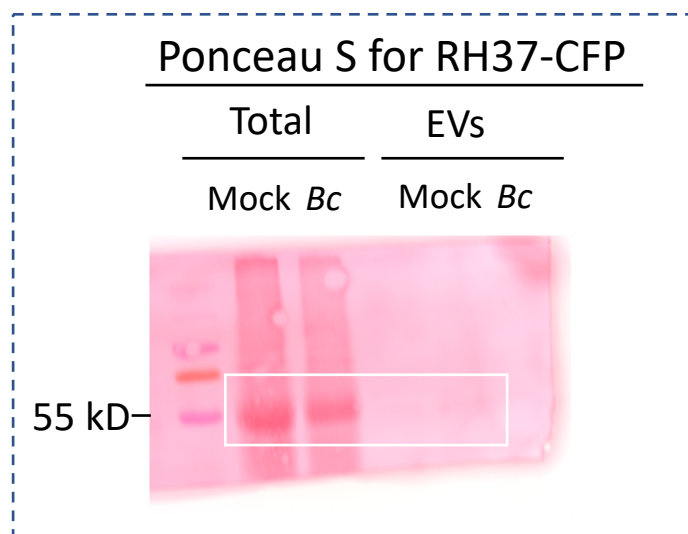

Figure 1b

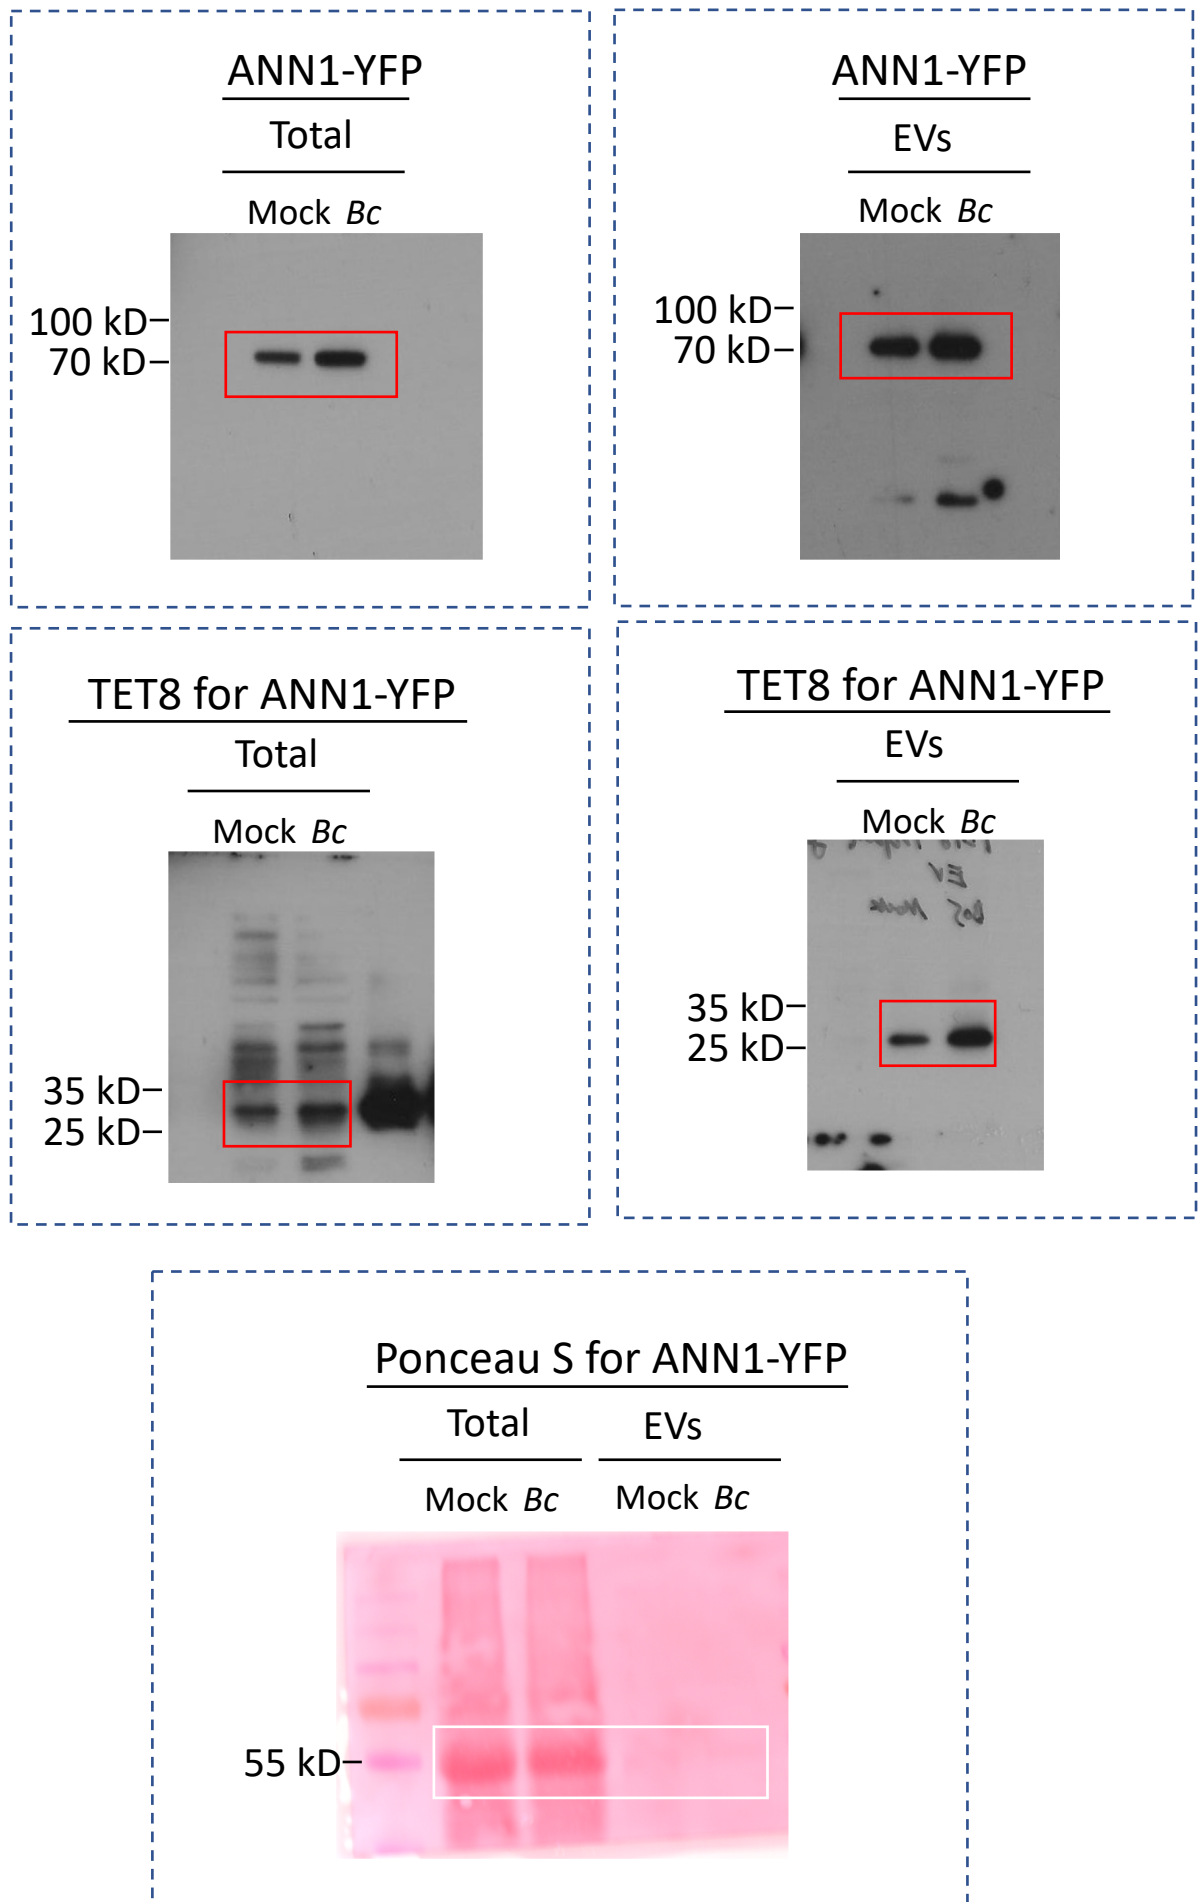

Figure 1b

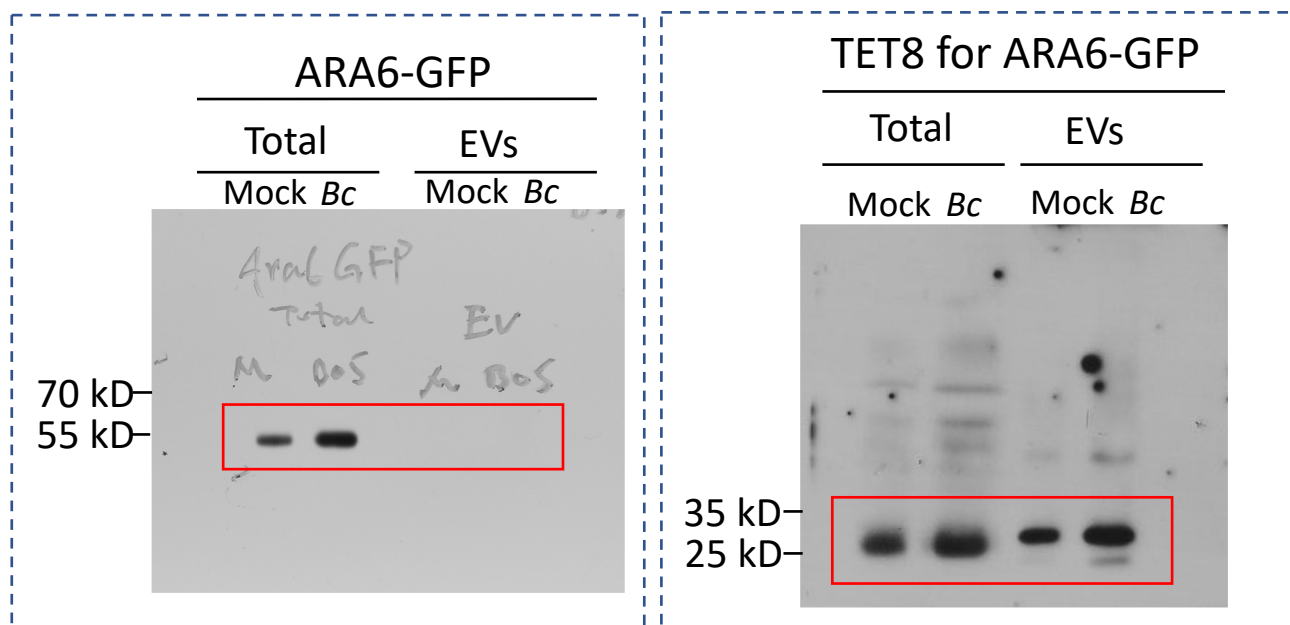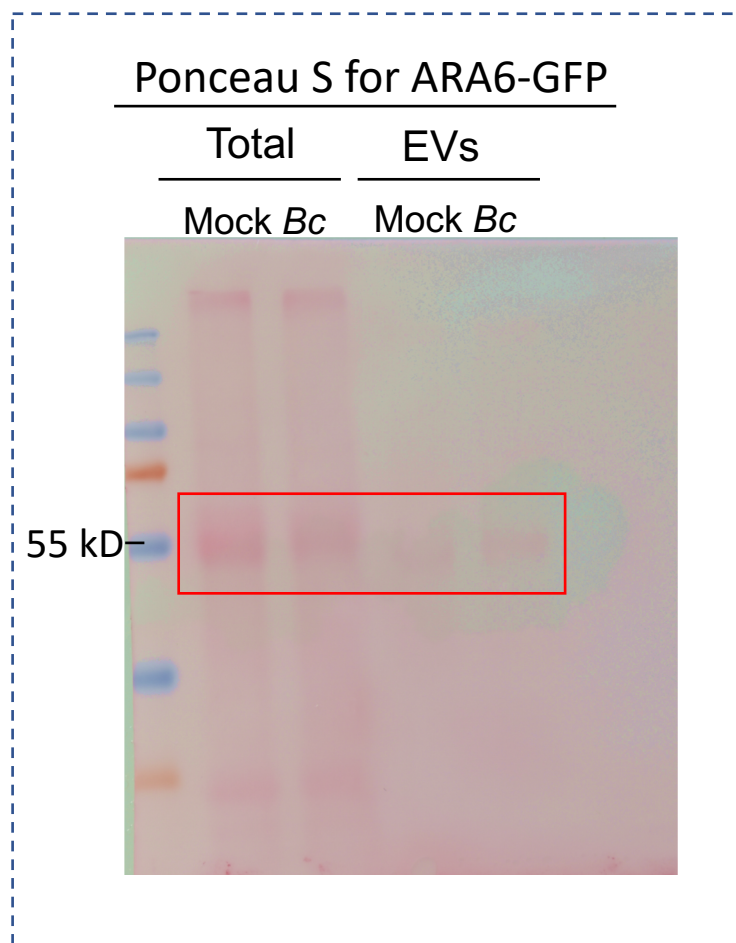

Figure 1b

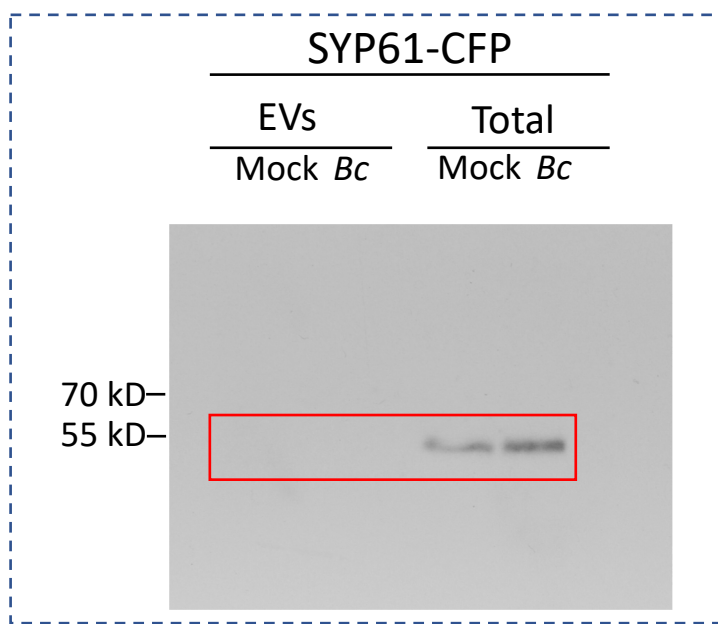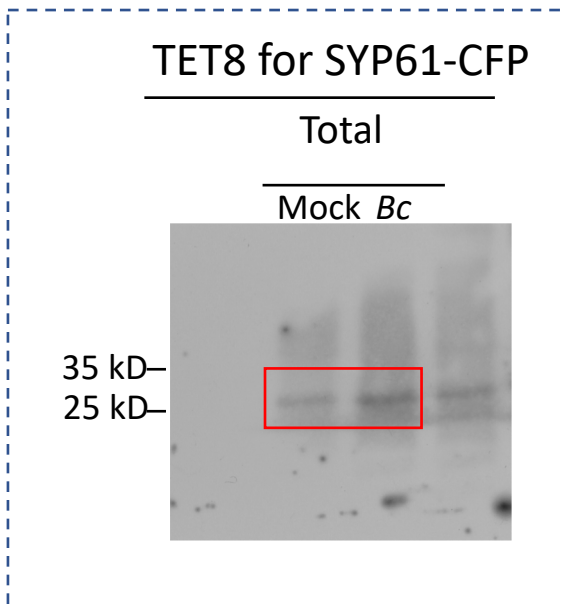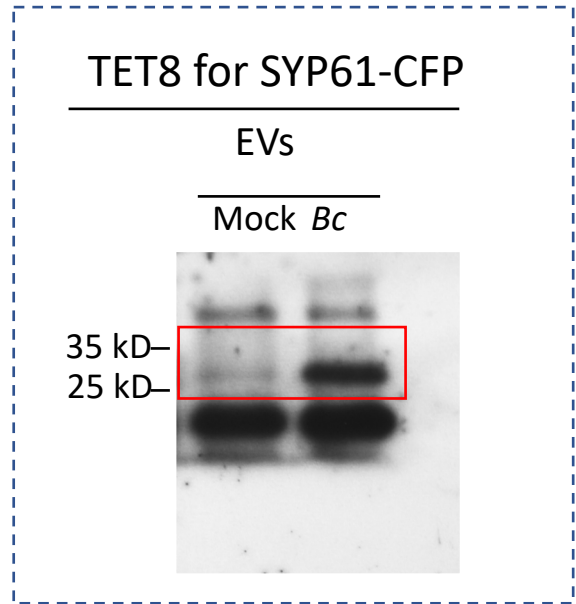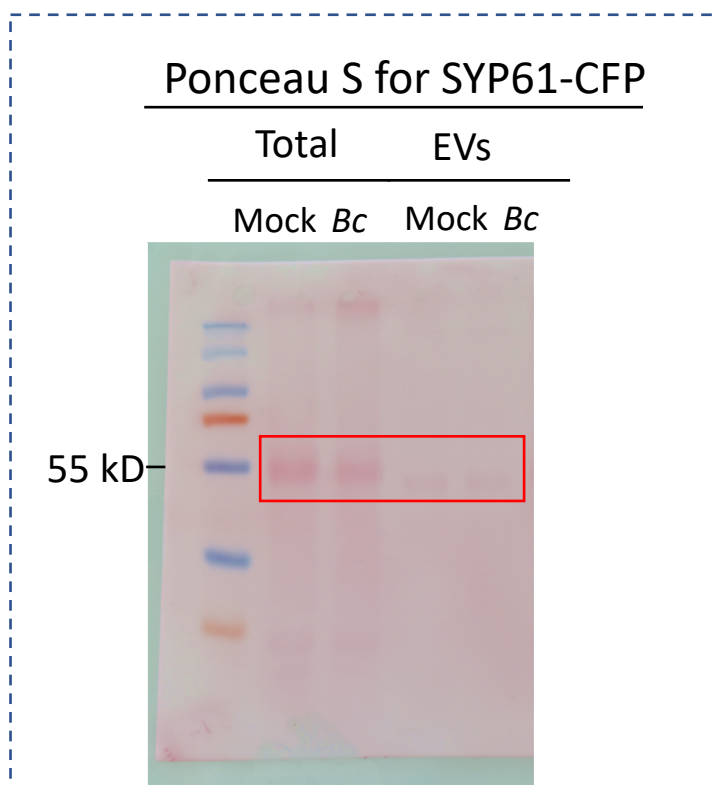

Figure 1c

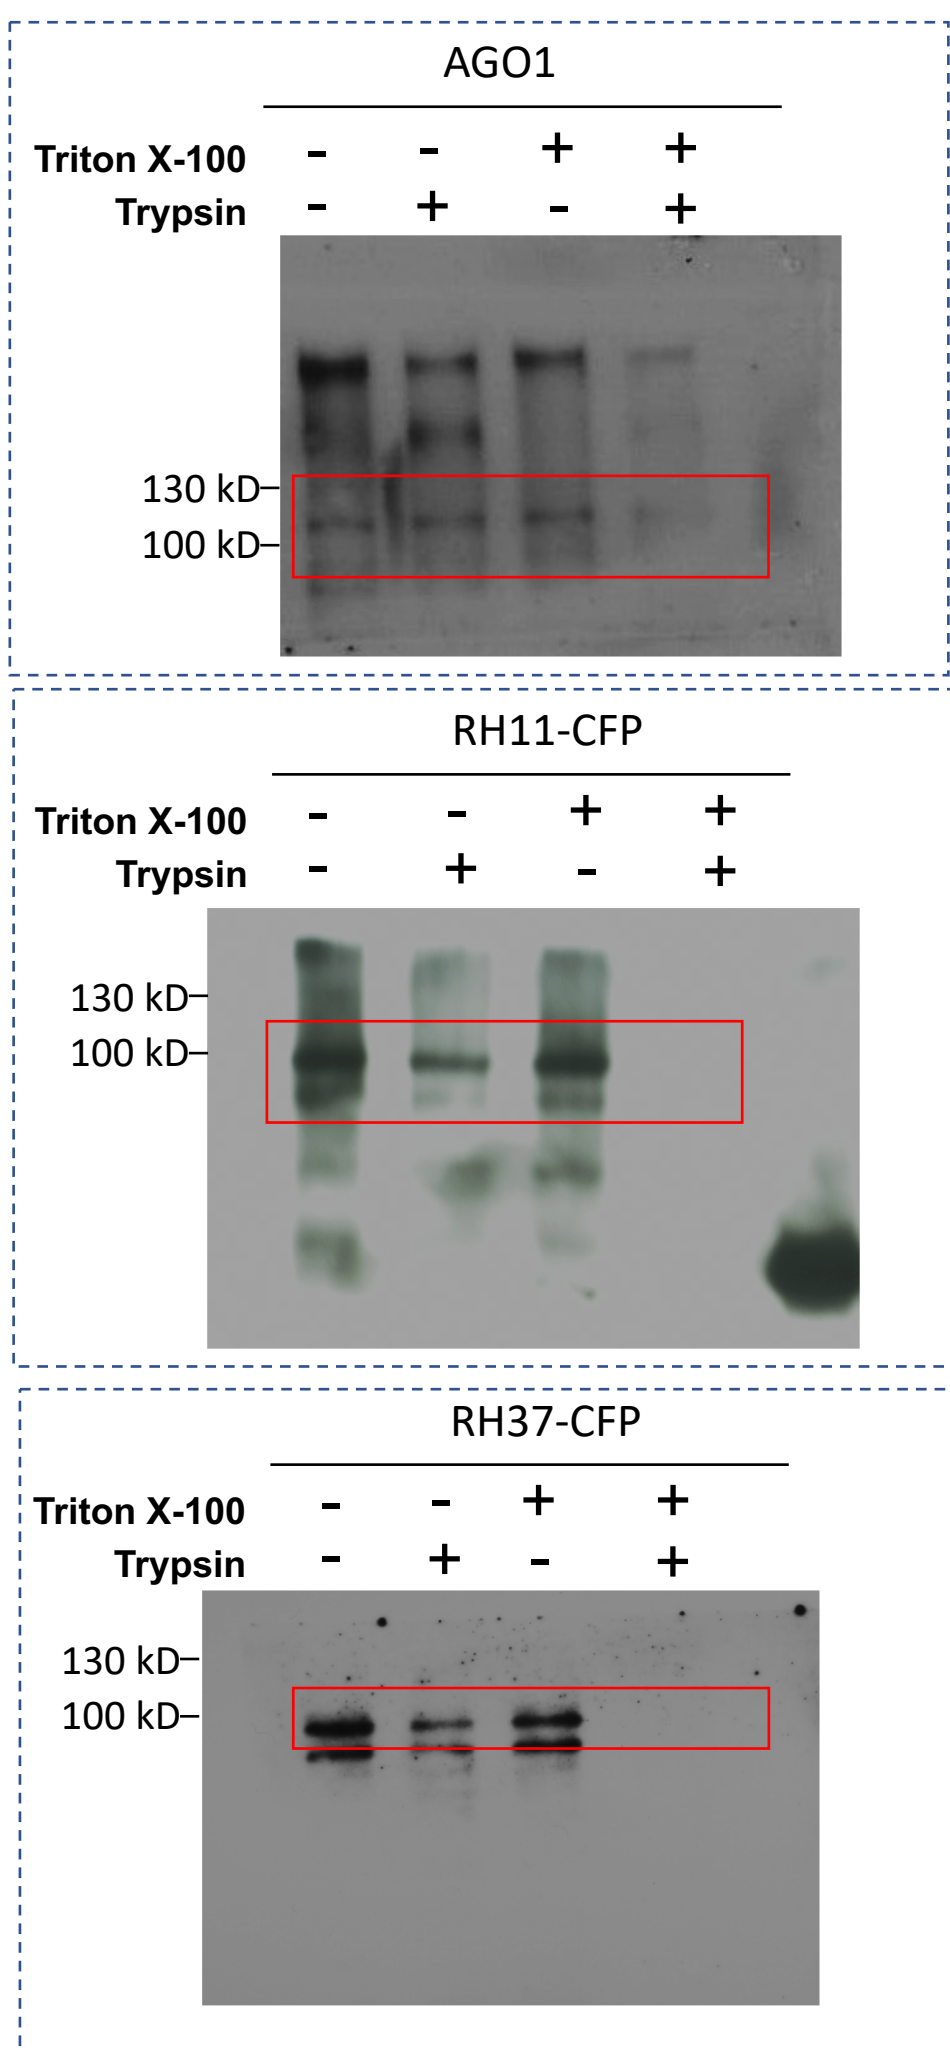



Figure 1c

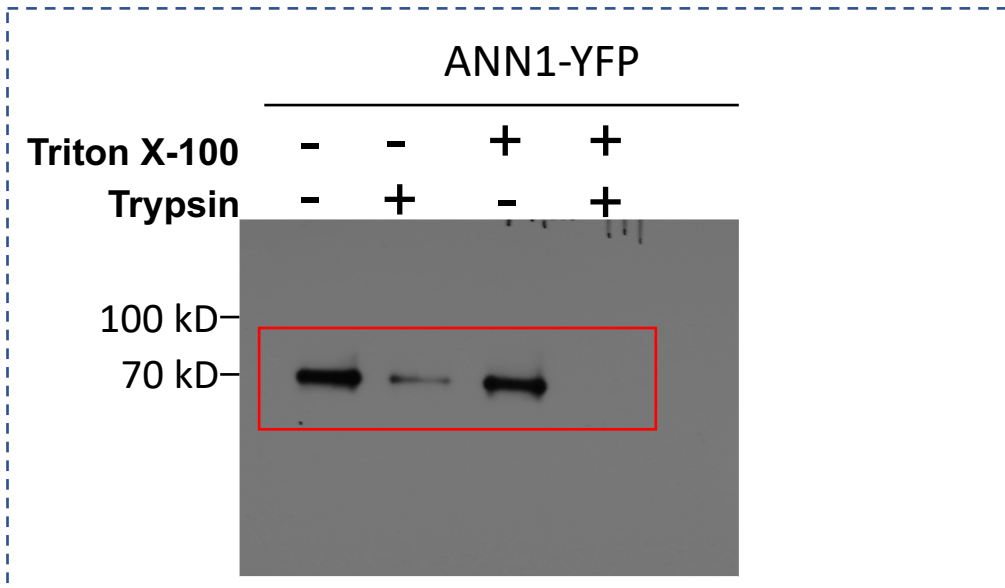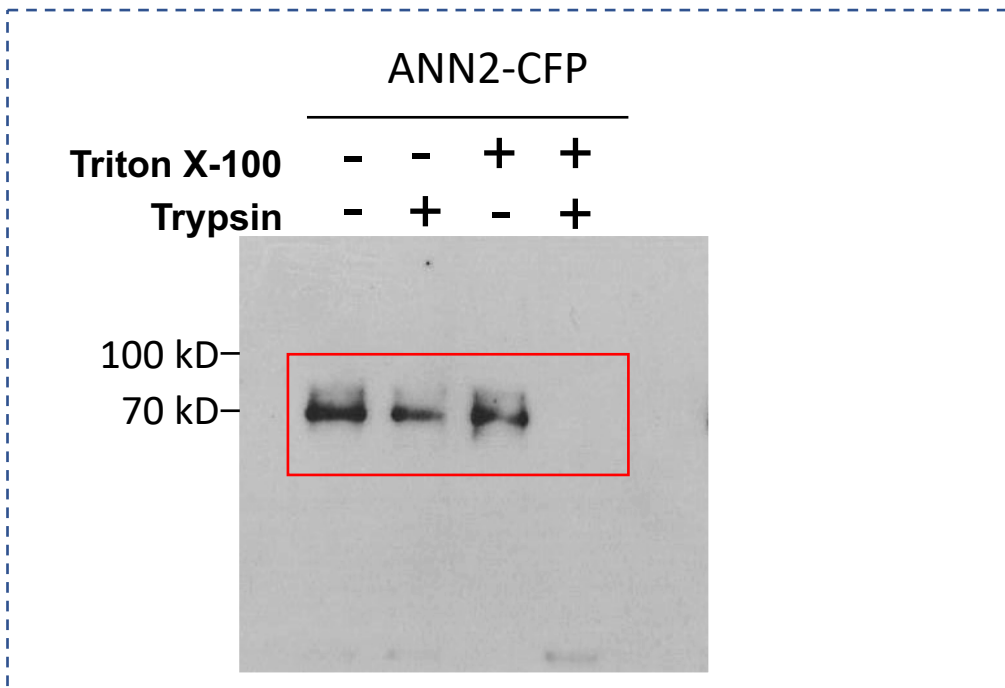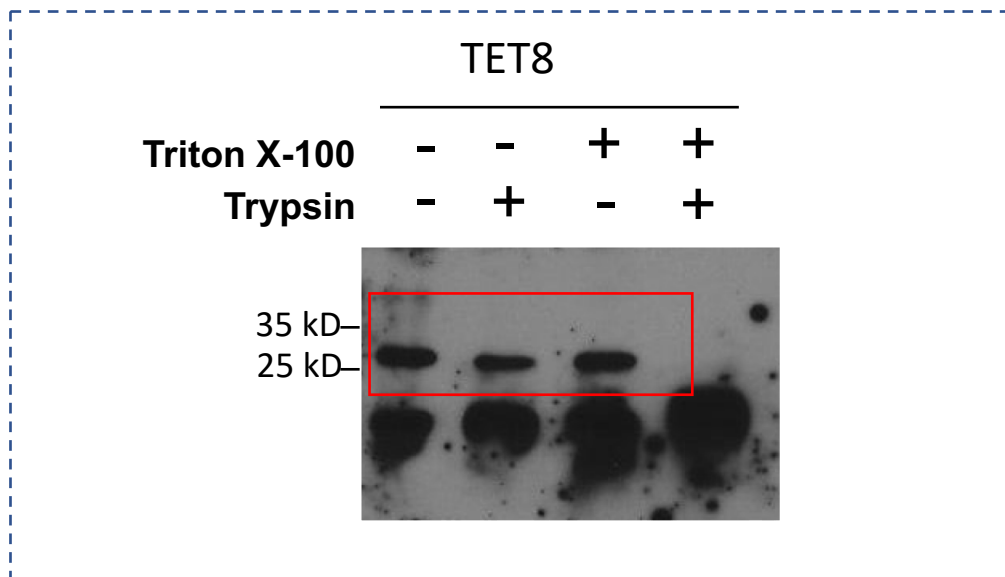

Supplement: NIHMS1667199-supplement-1667199_SourceData_Fig1.pdf [file NIHMS1667199-supplement-1667199_SourceData_Fig1.pdf]

Figure 2b

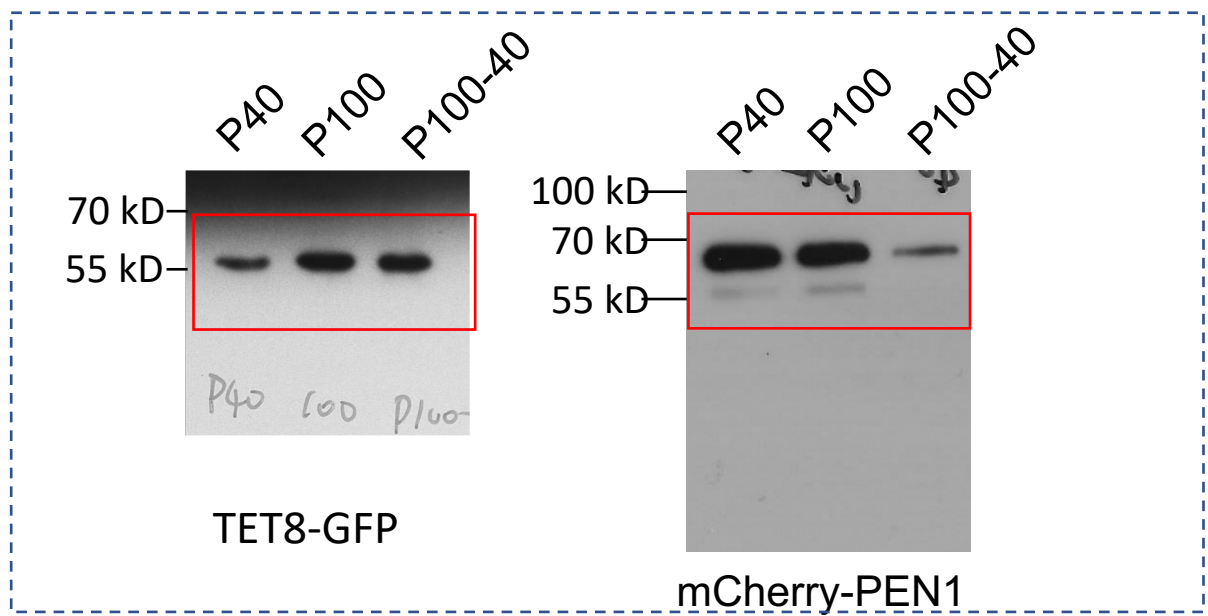

Figure 2d

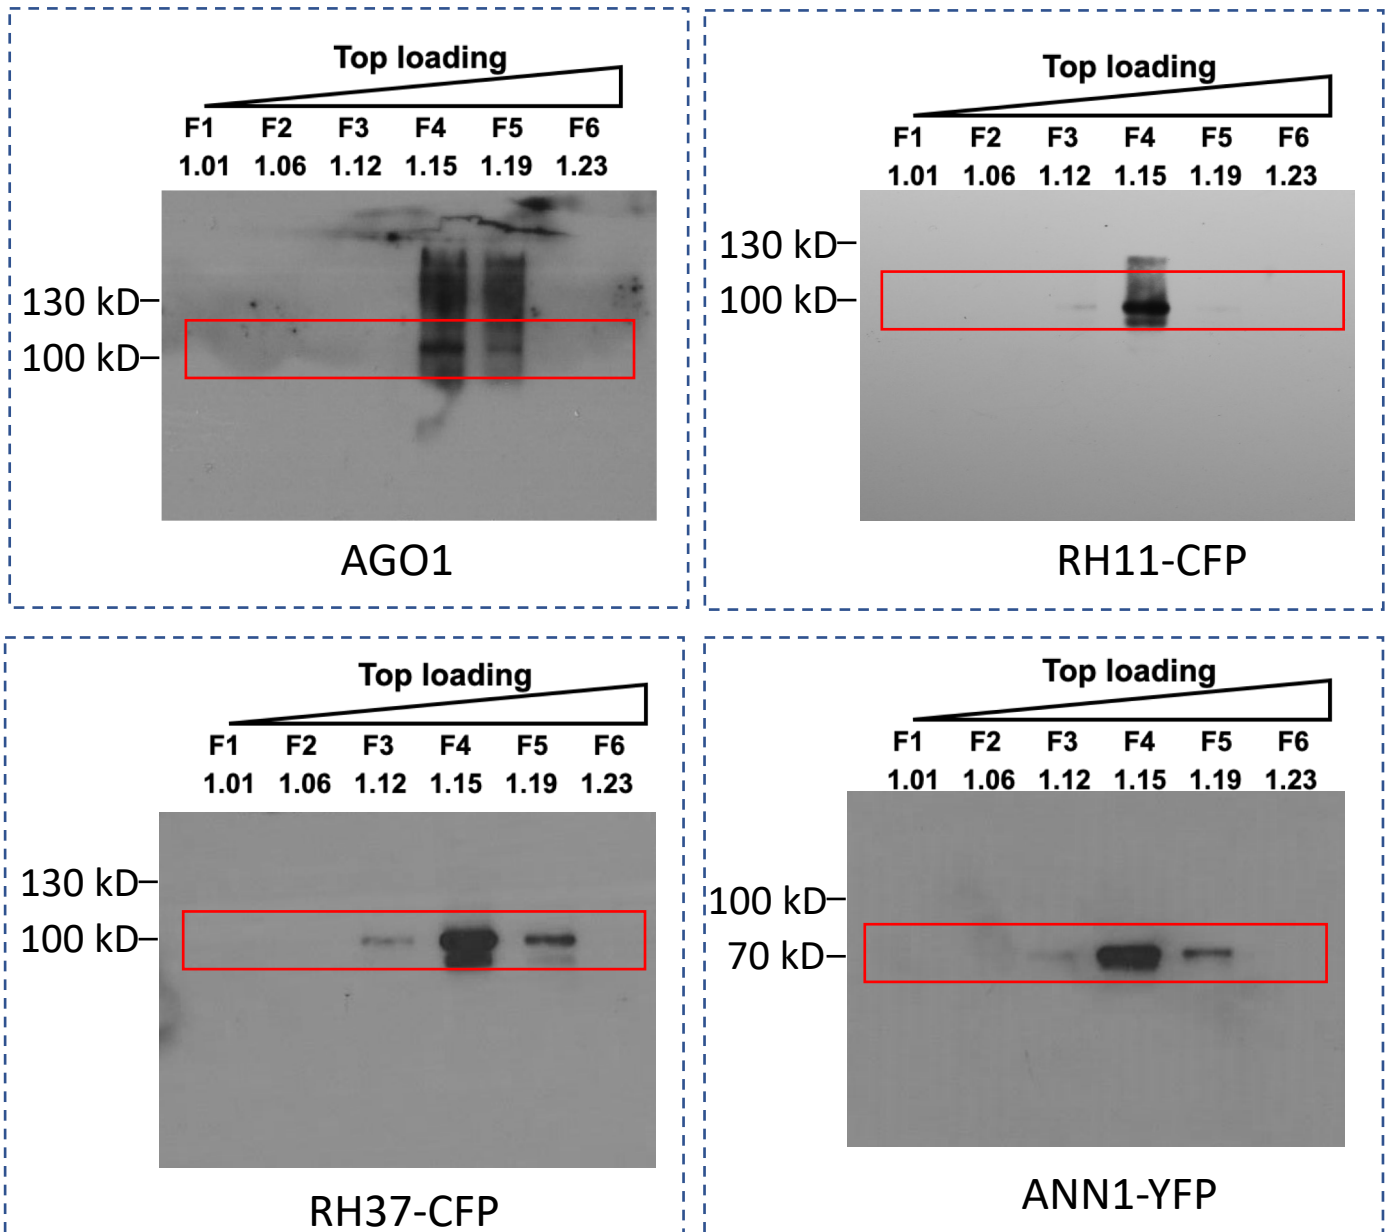

Figure 2d

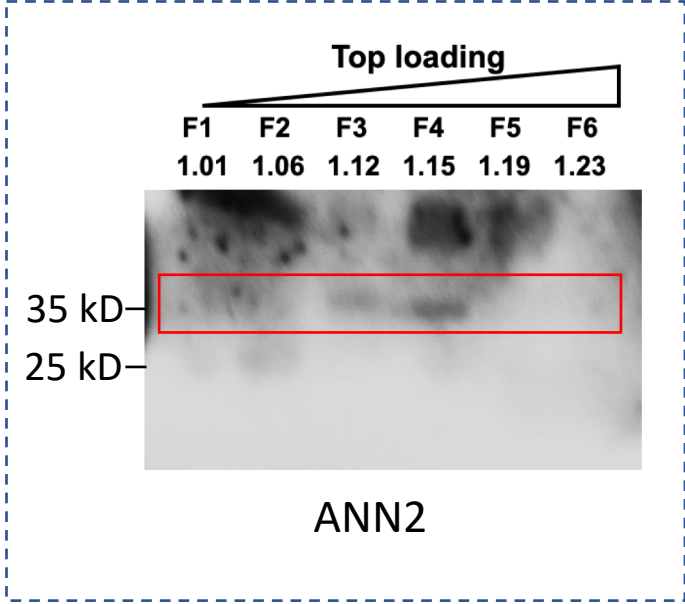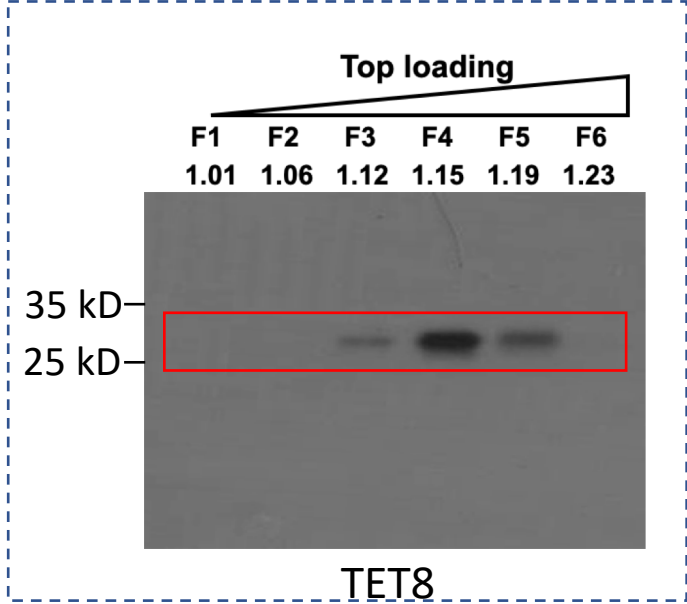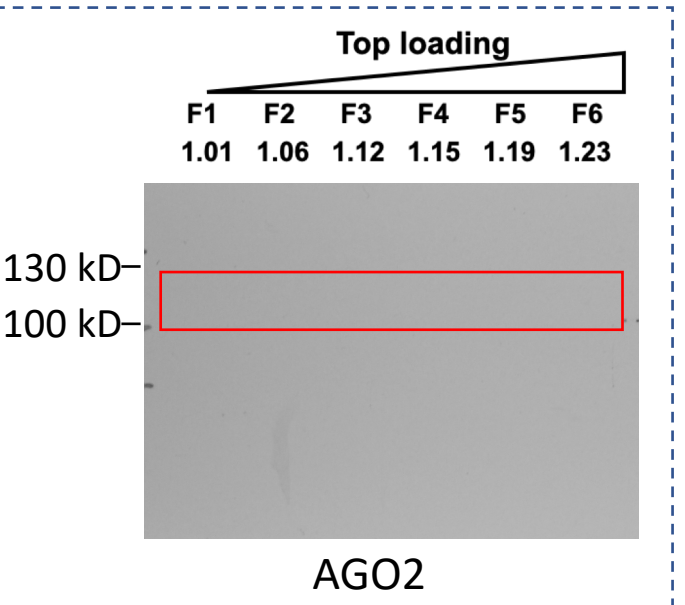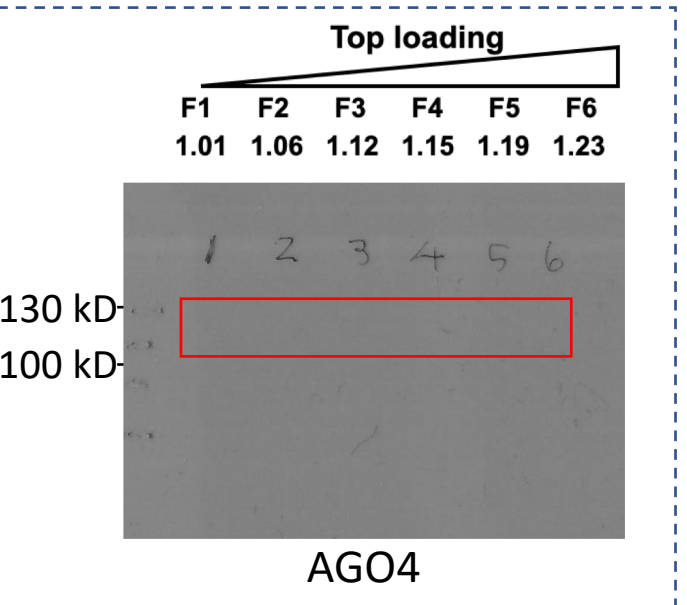

Figure 2d

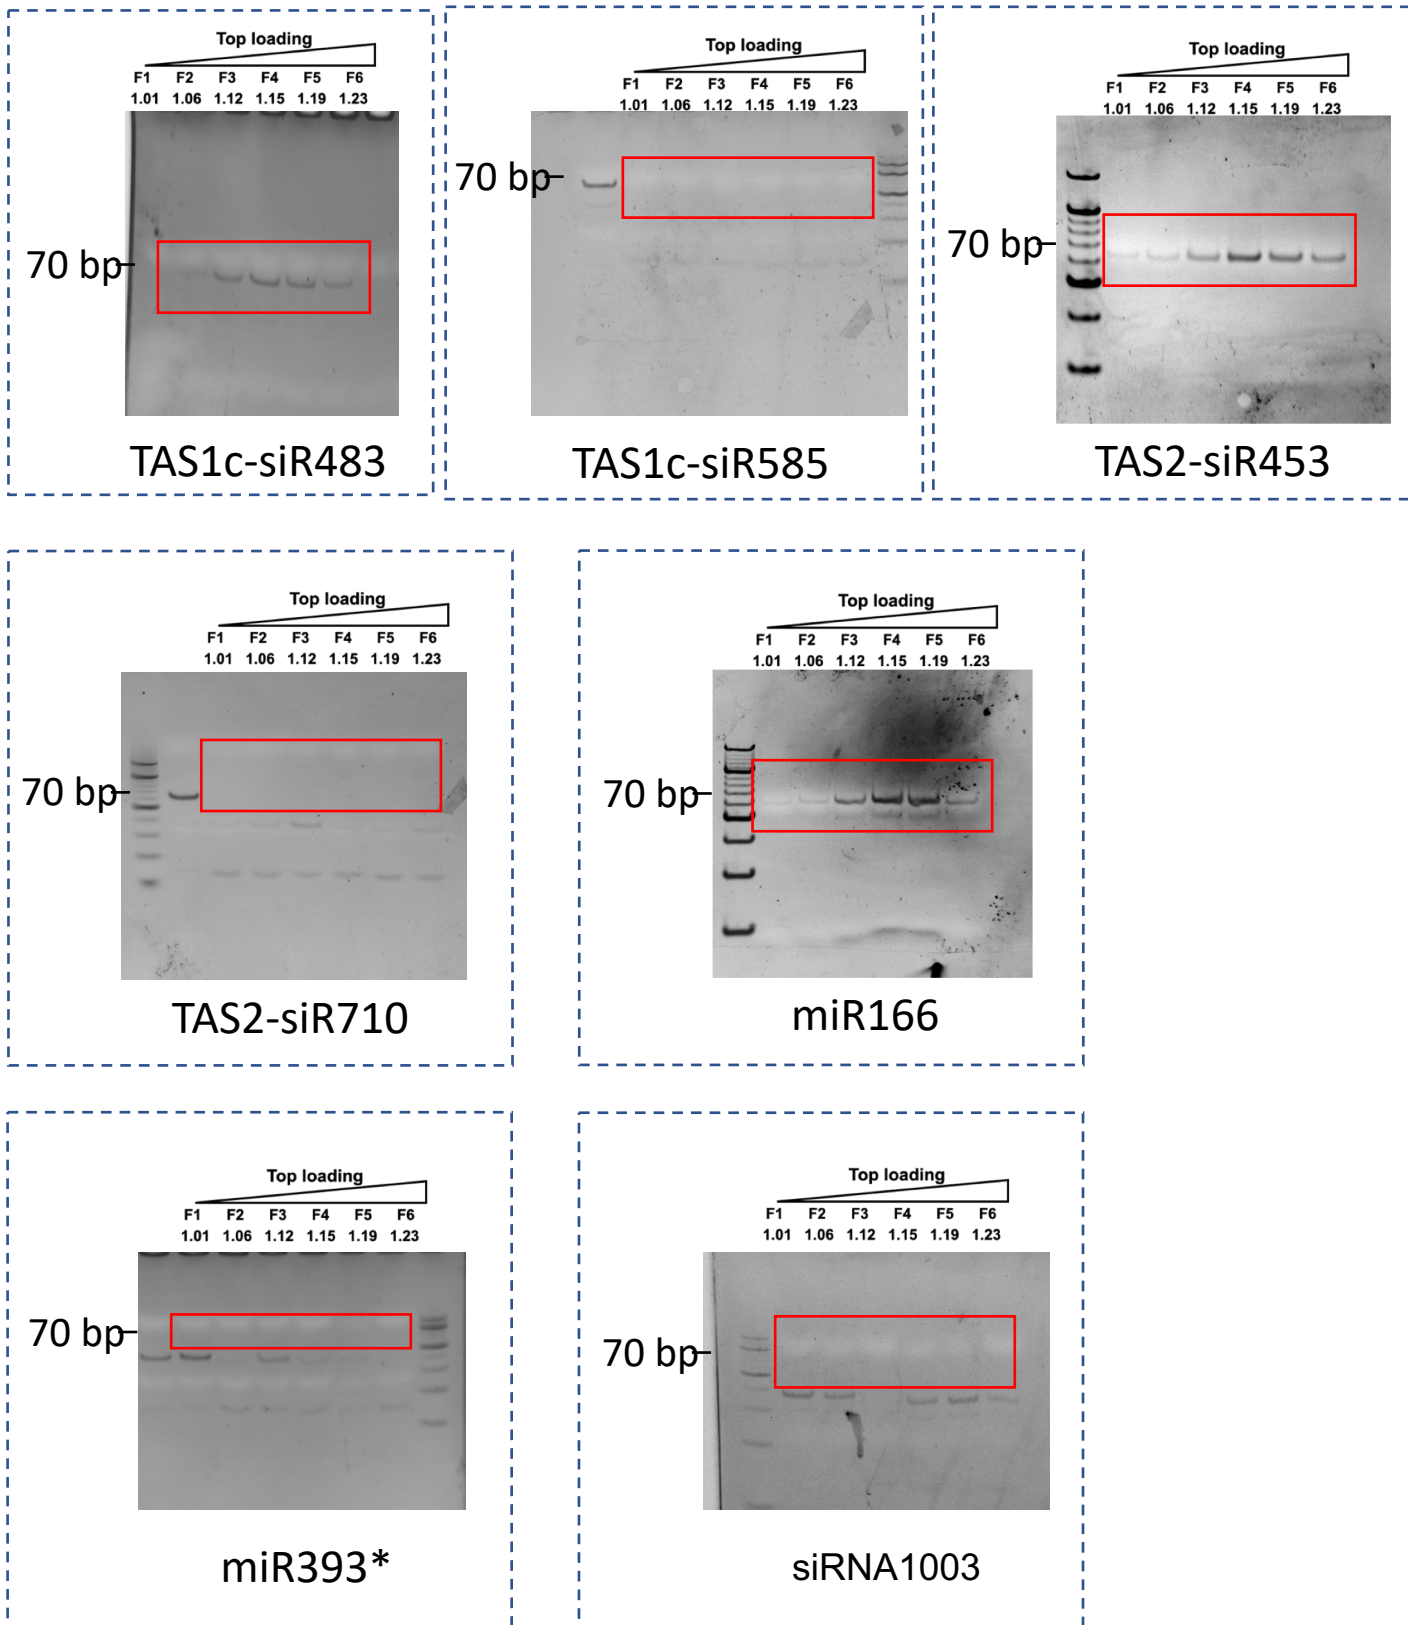

Supplement: NIHMS1667199-supplement-1667199_SourceData_Fig2.pdf [file NIHMS1667199-supplement-1667199_SourceData_Fig2.pdf]

Figure 3b

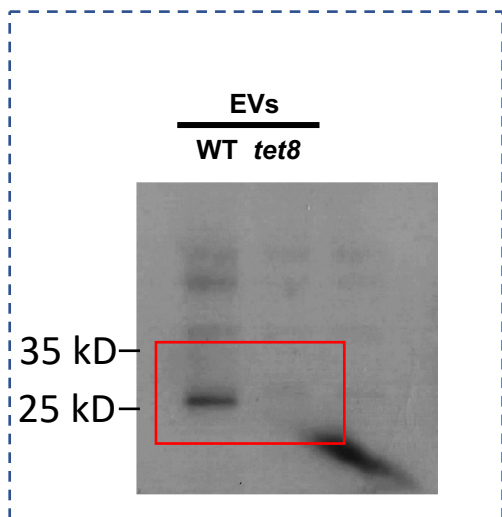

Figure 3d

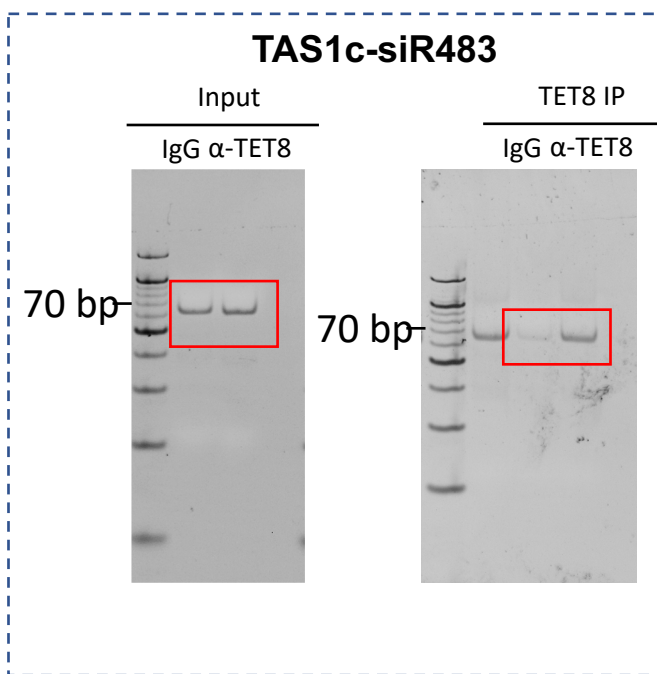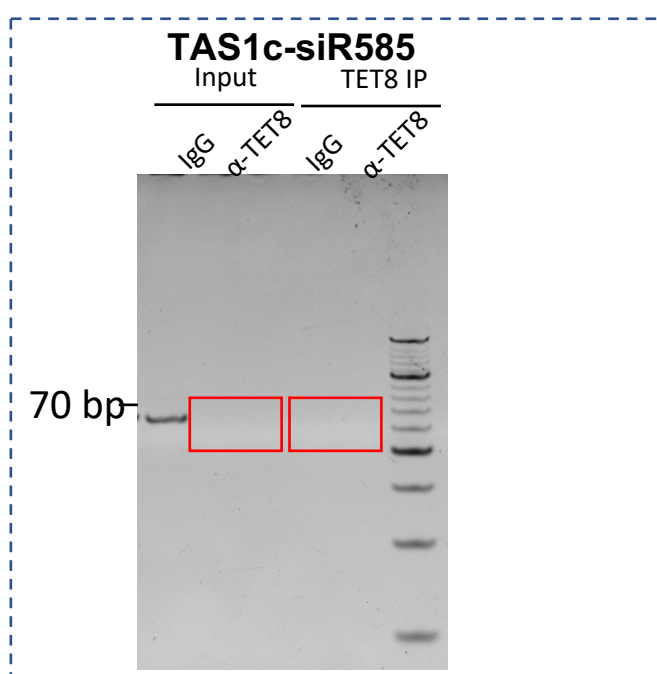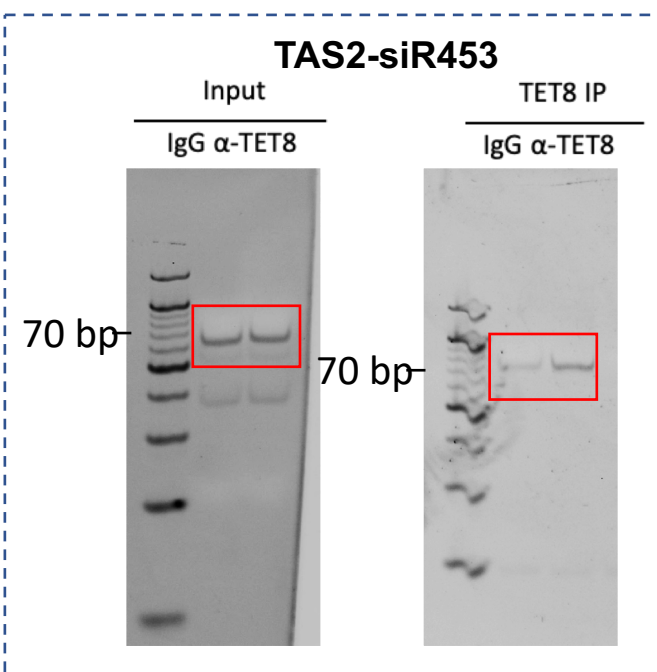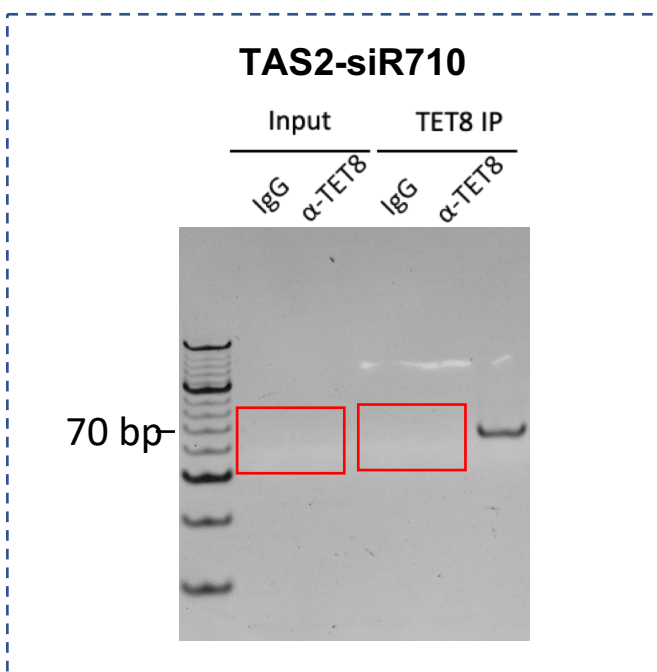

Figure 3d

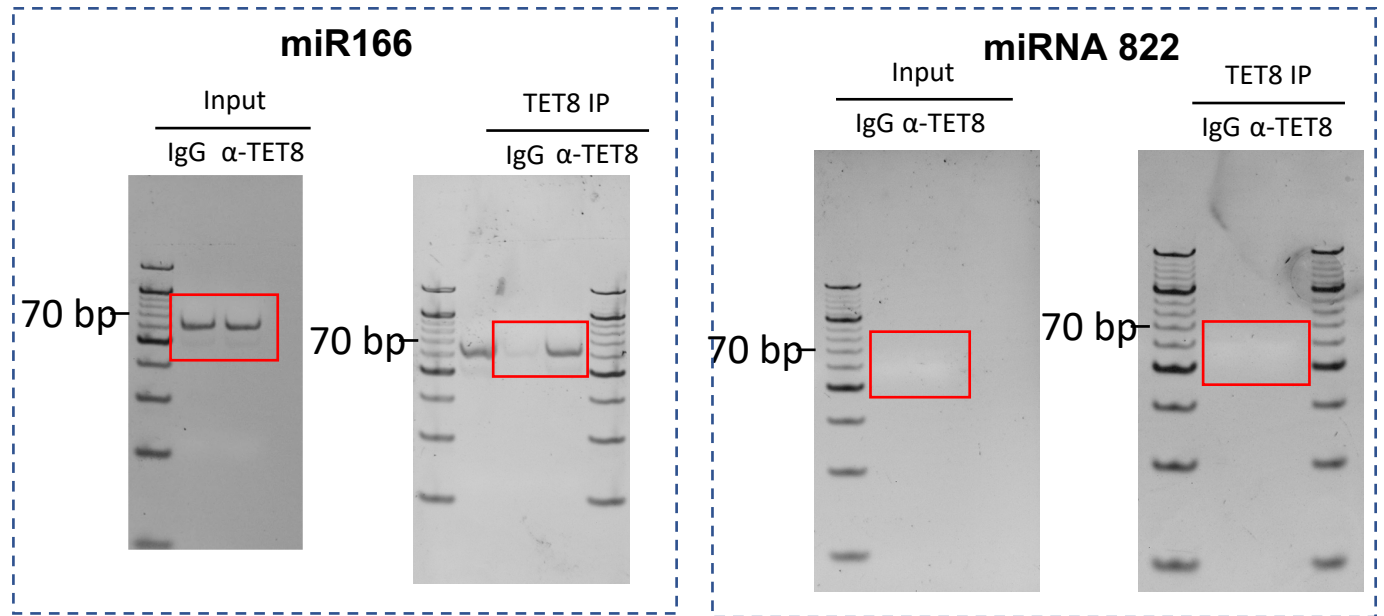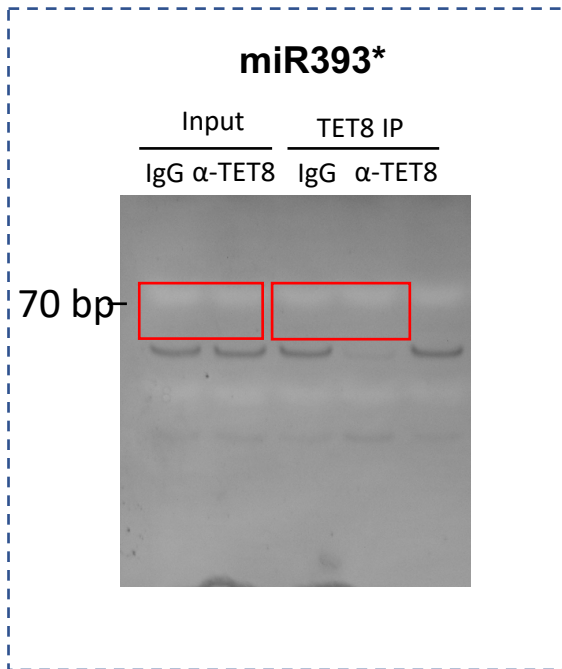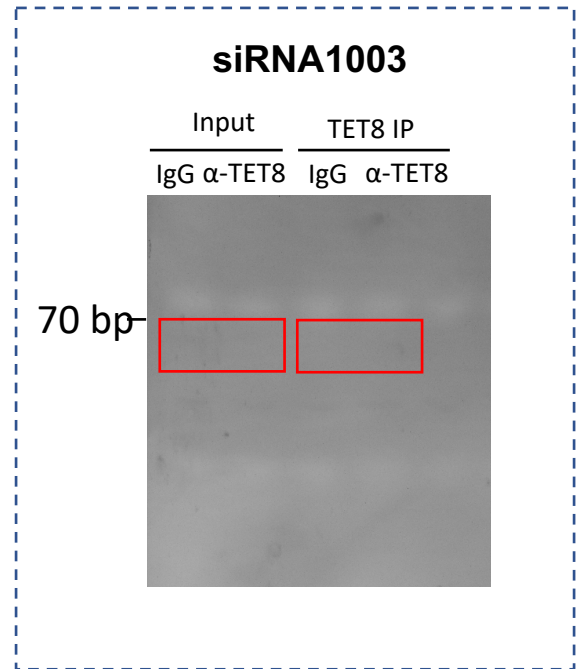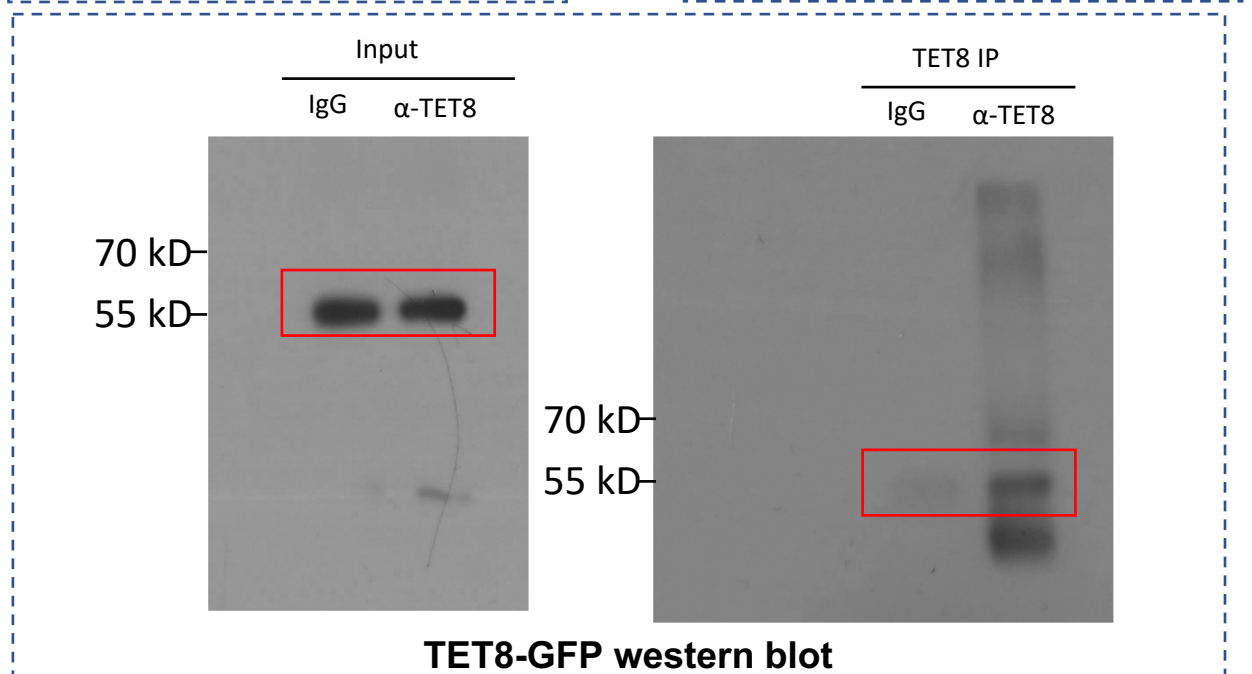

Figure 3e

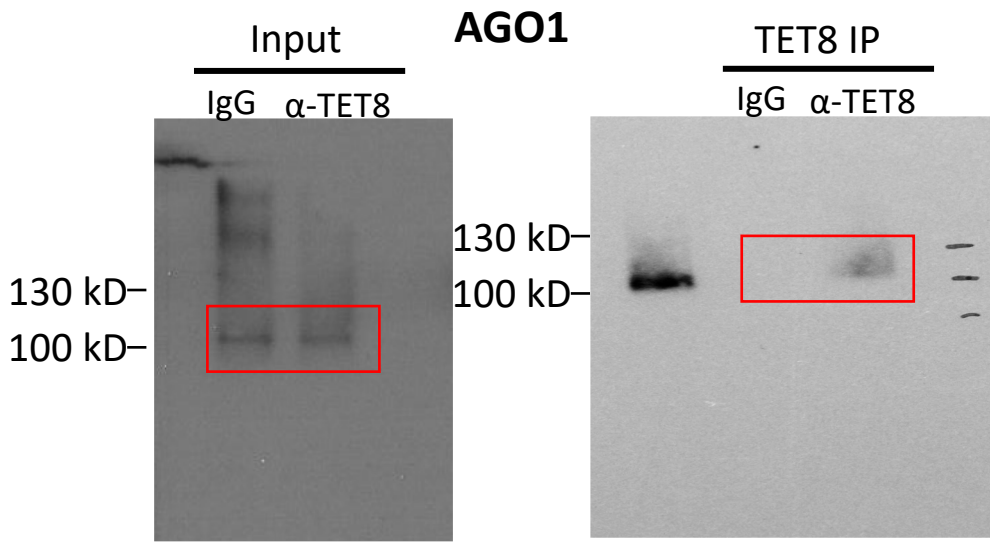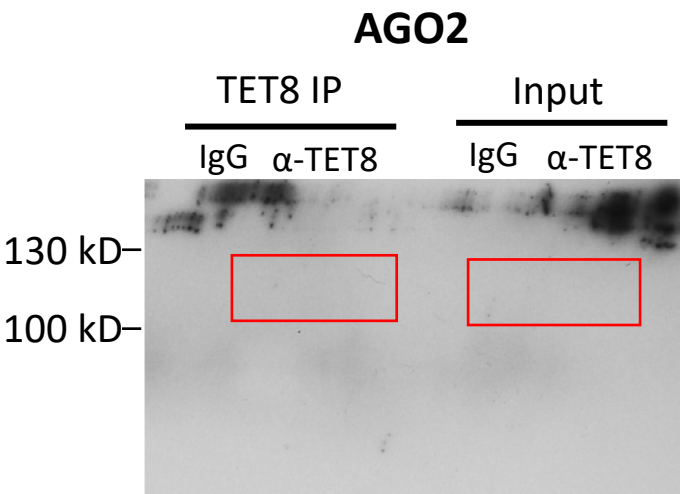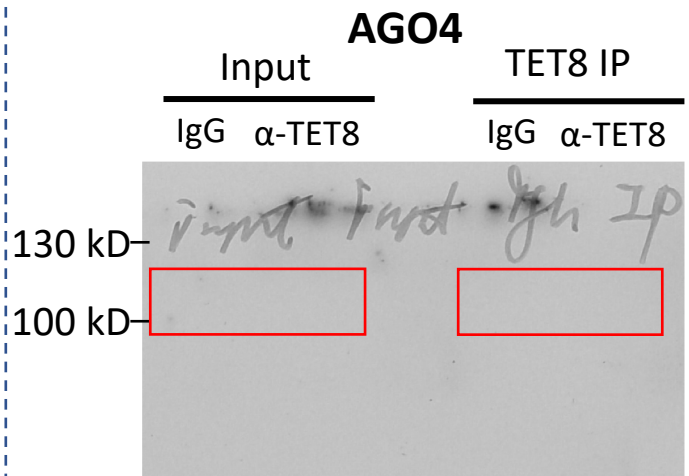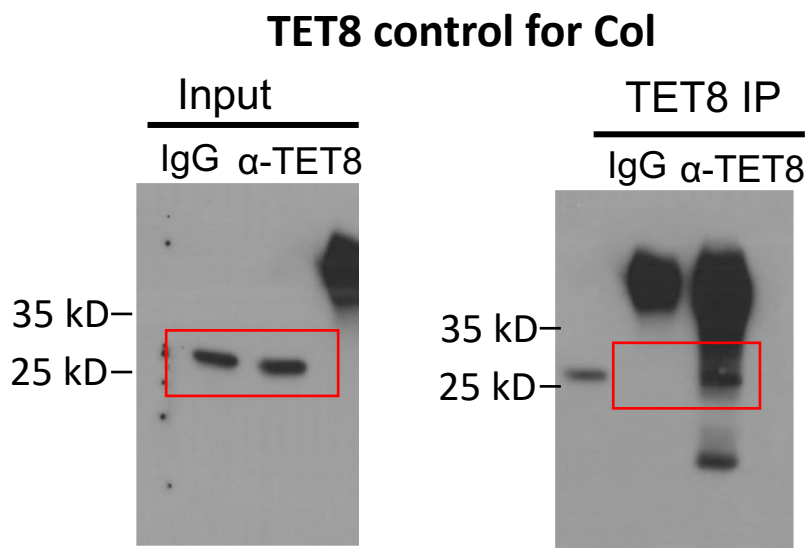

Figure 3e

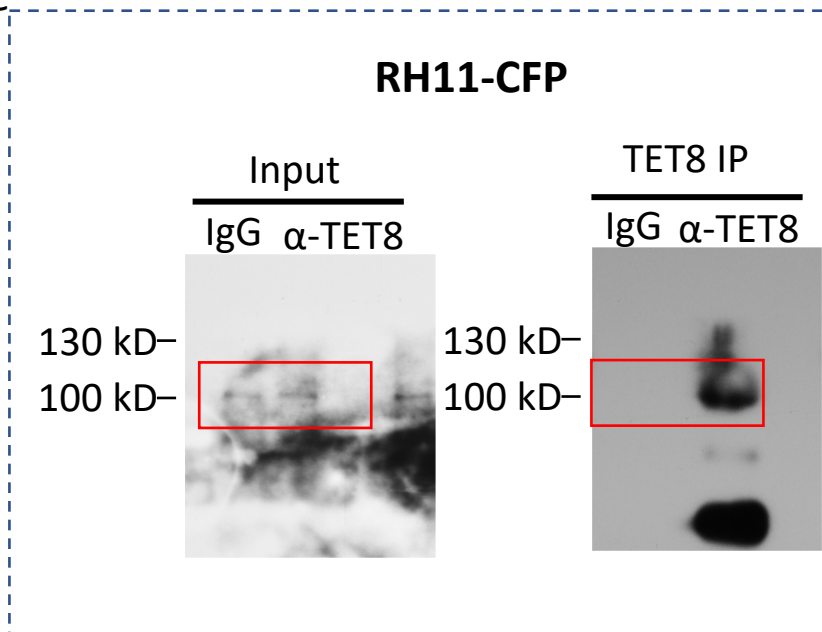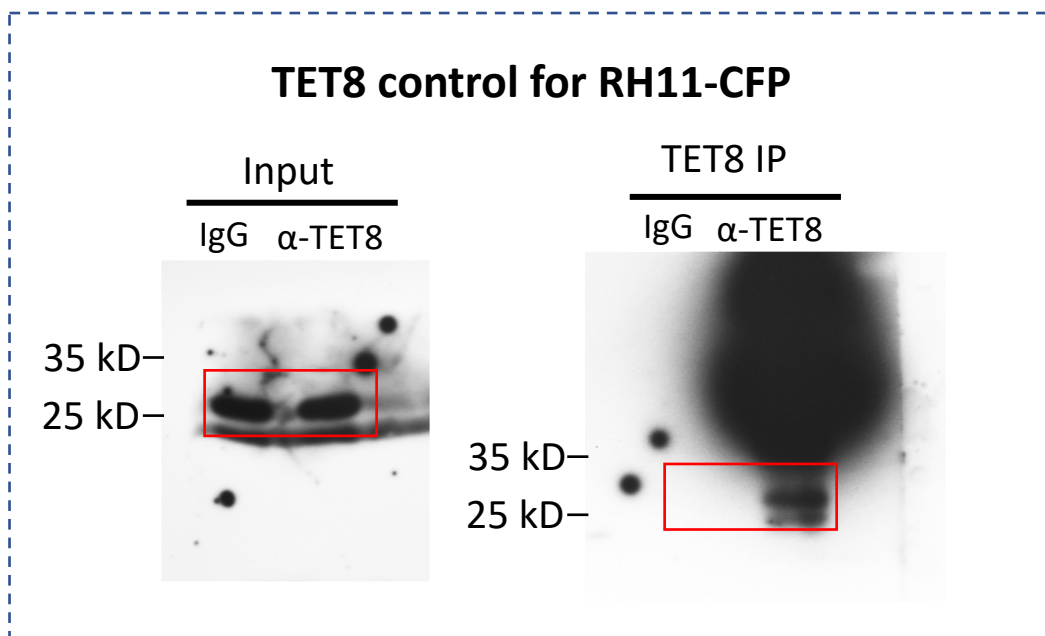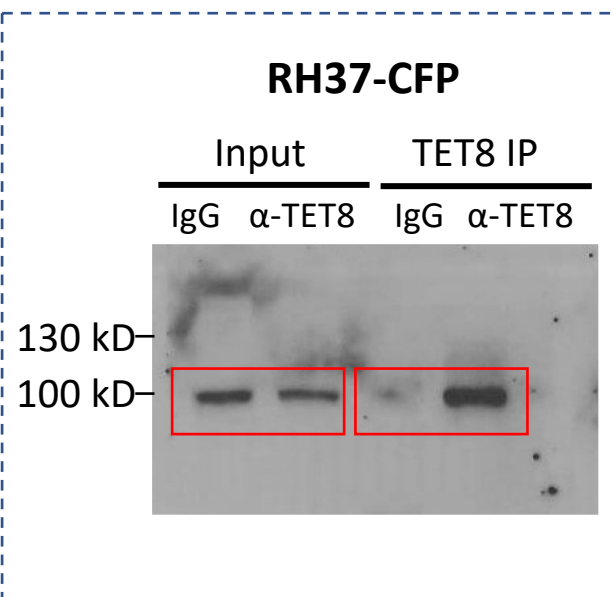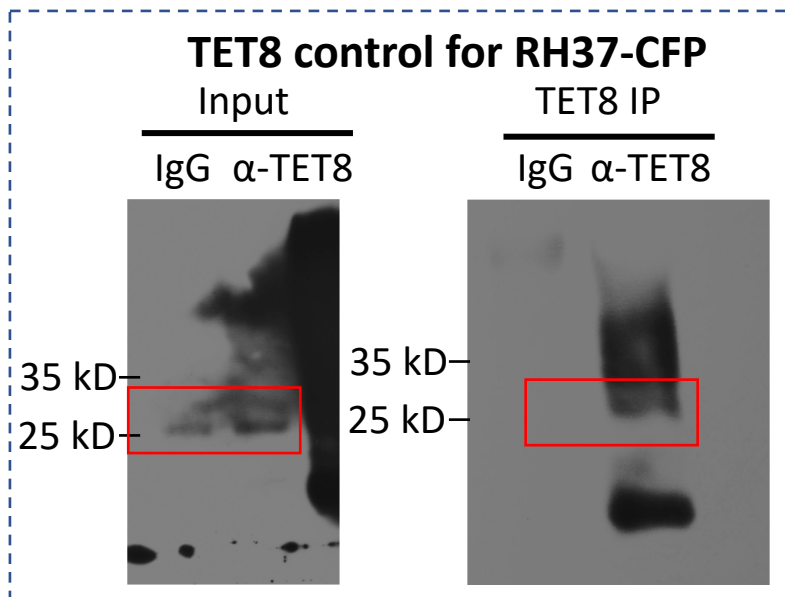

Figure 3e

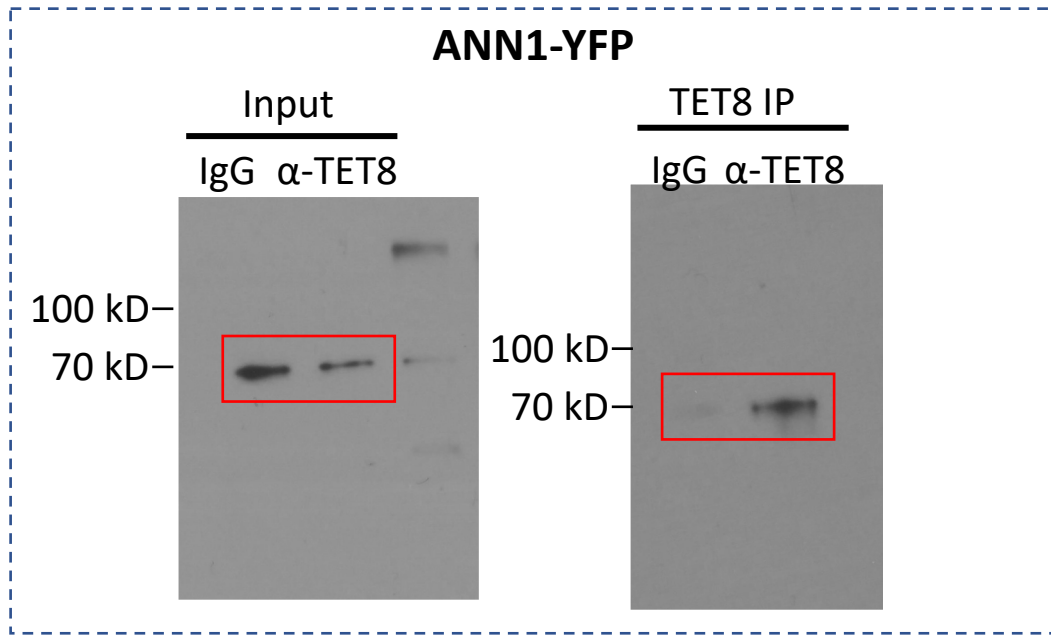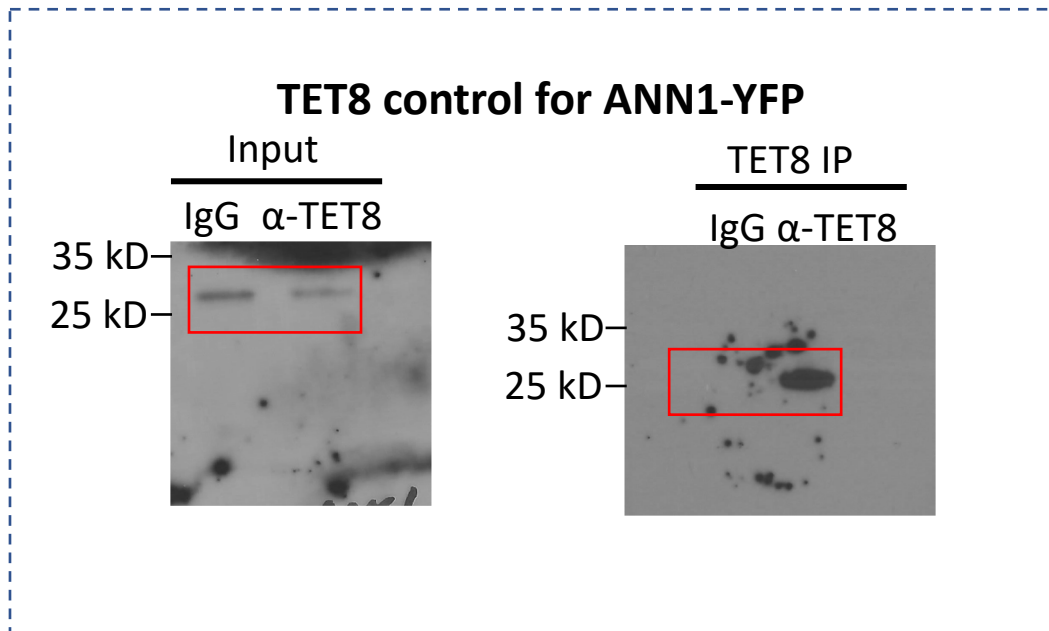

Figure 3e

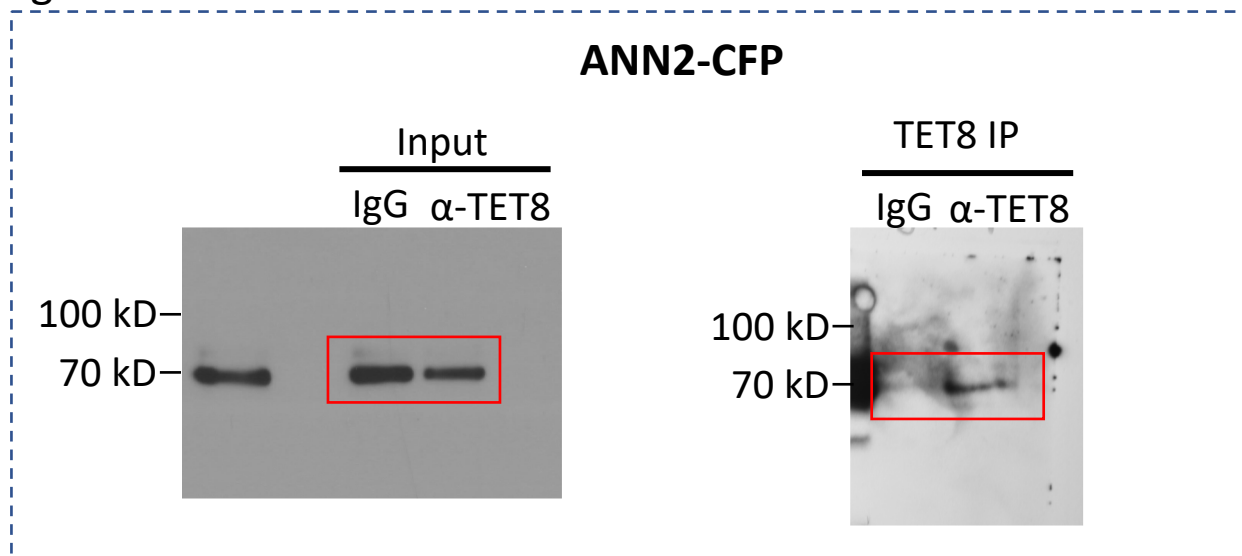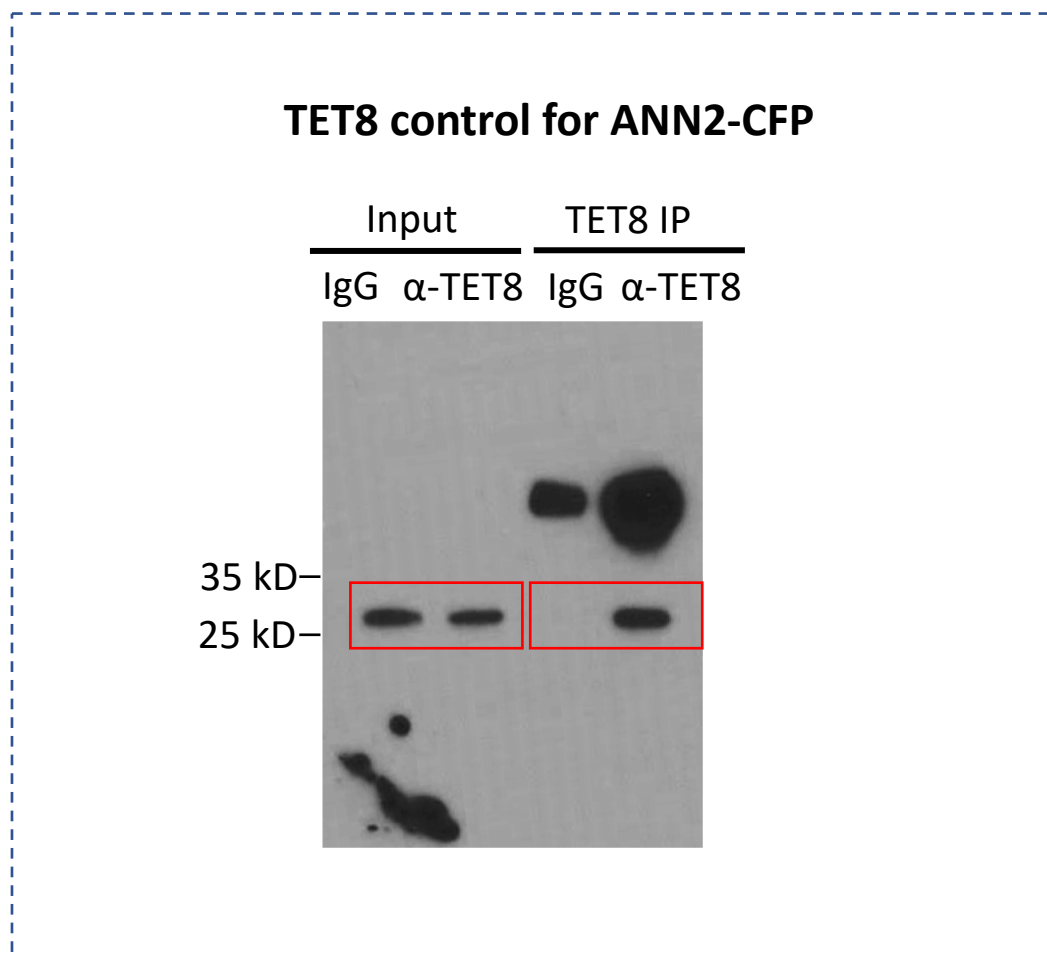

Supplement: NIHMS1667199-supplement-1667199_SourceData_Fig3.pdf [file NIHMS1667199-supplement-1667199_SourceData_Fig3.pdf]

Figure 6a

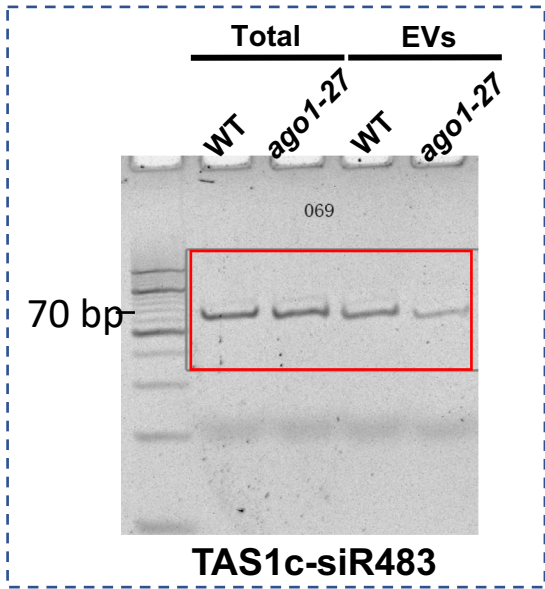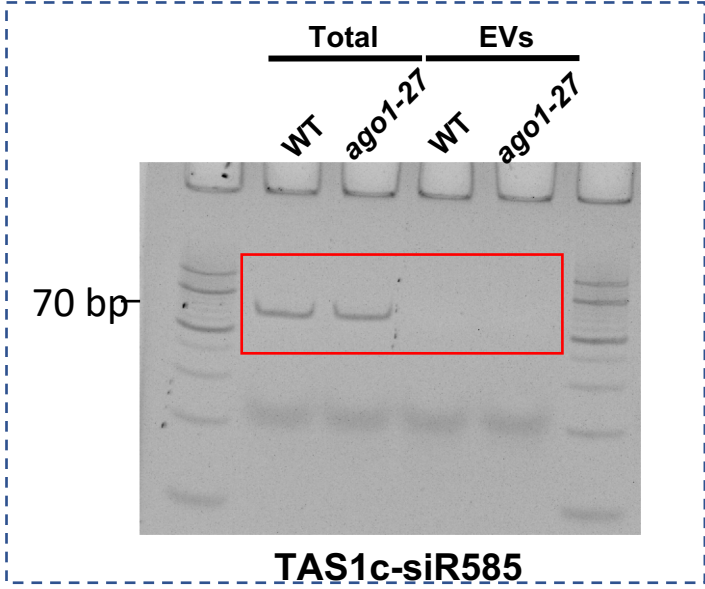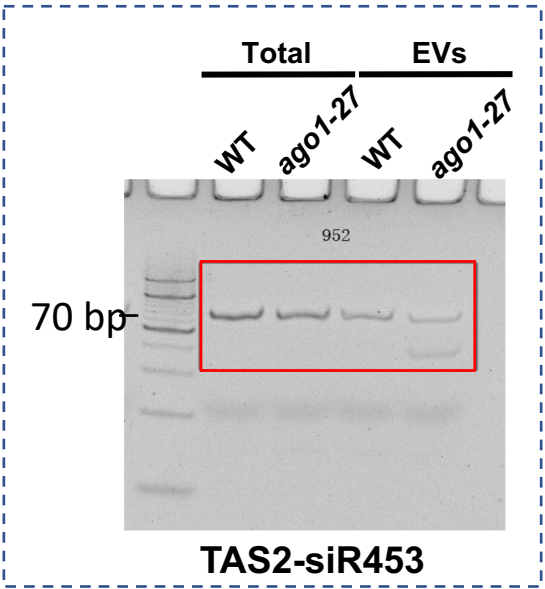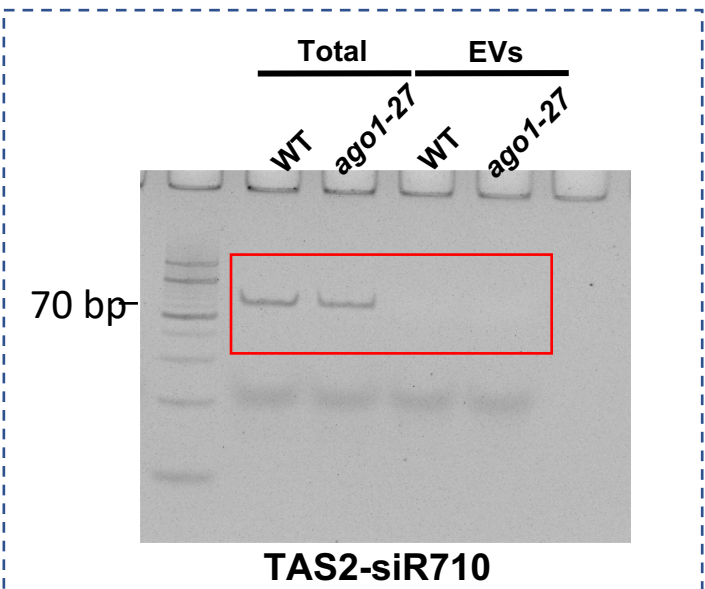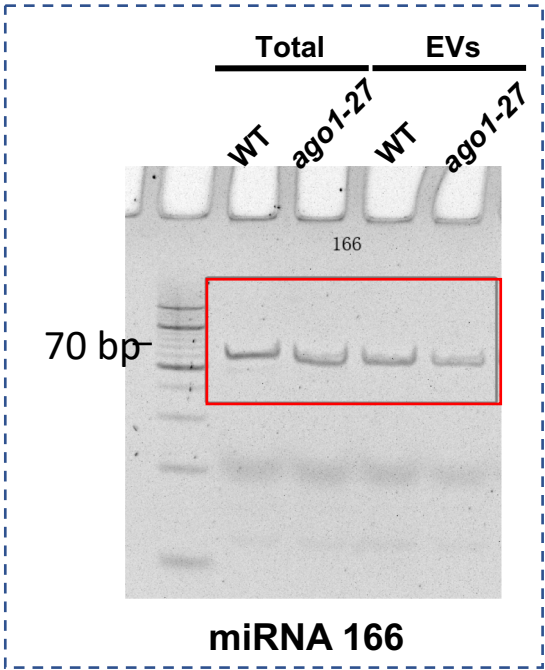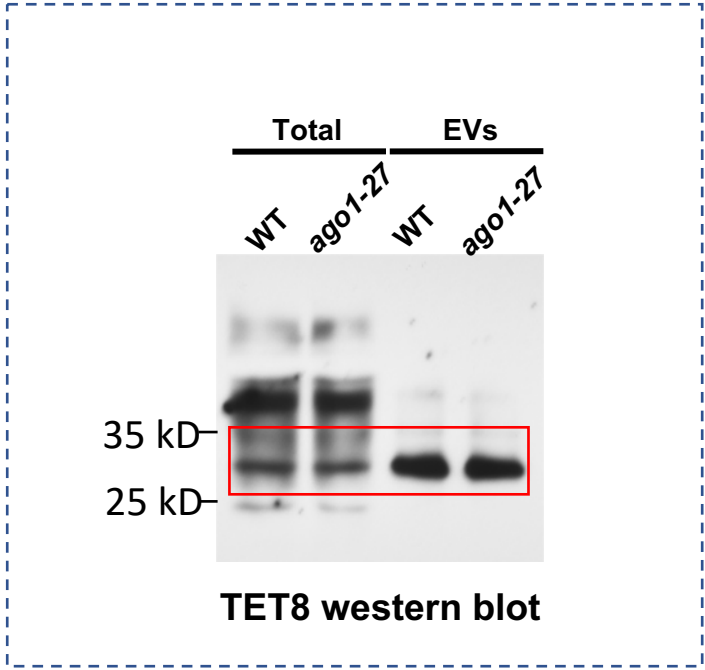

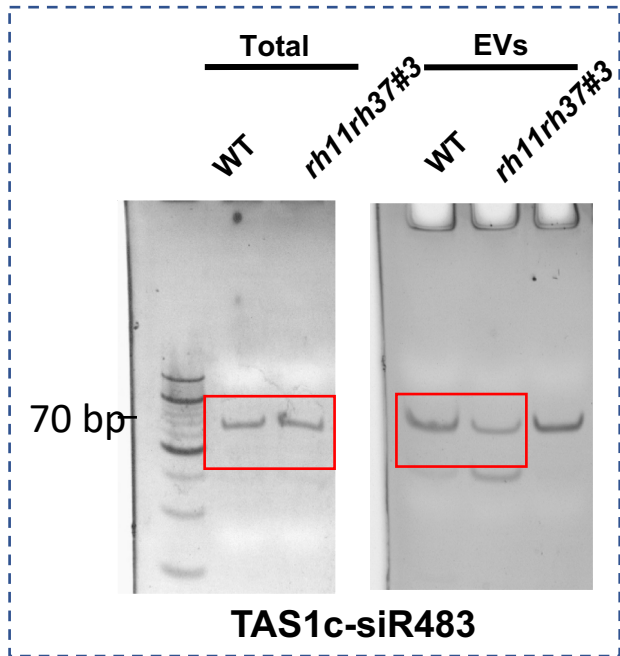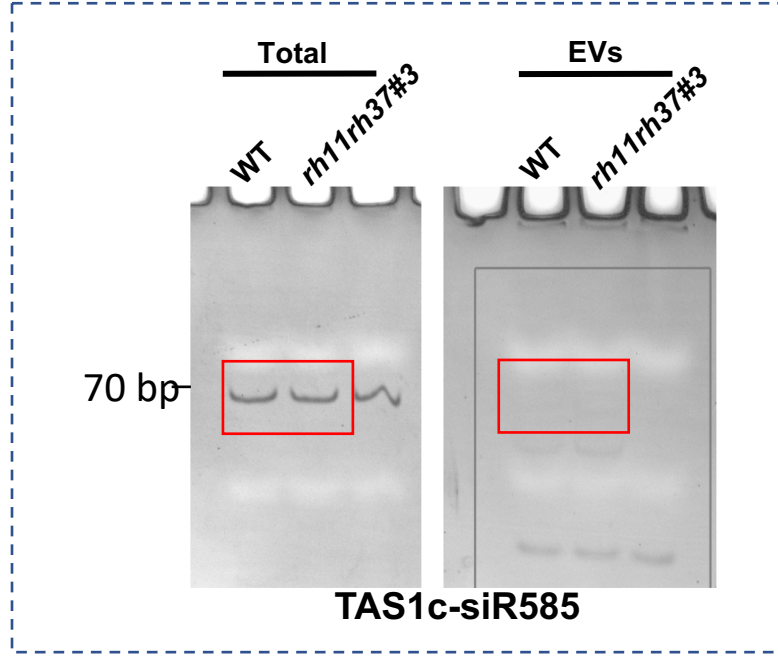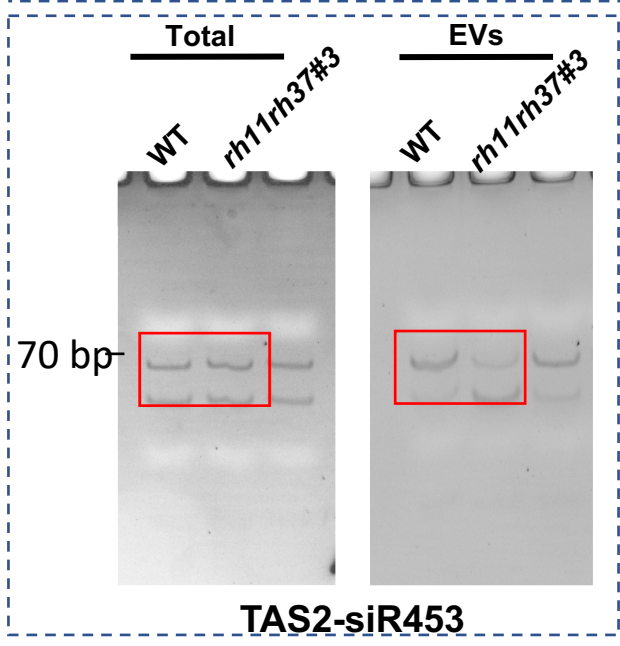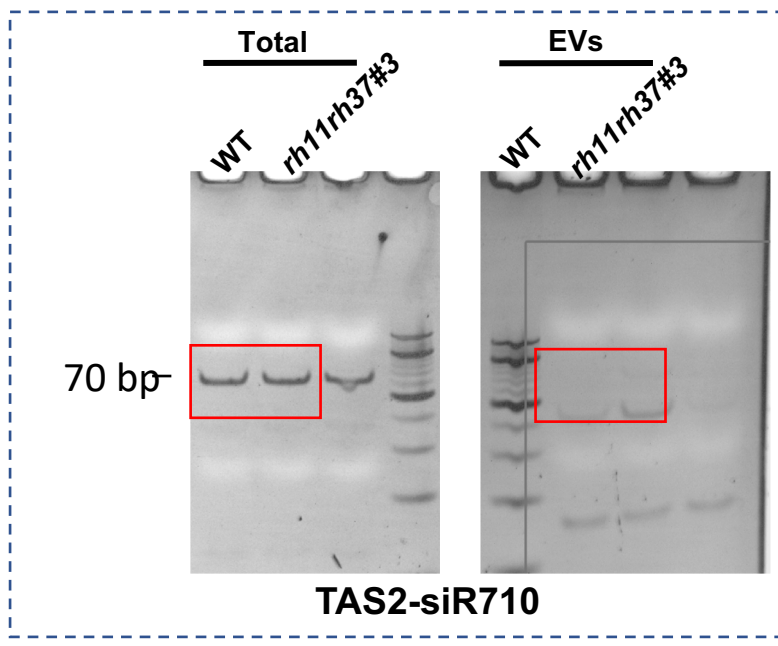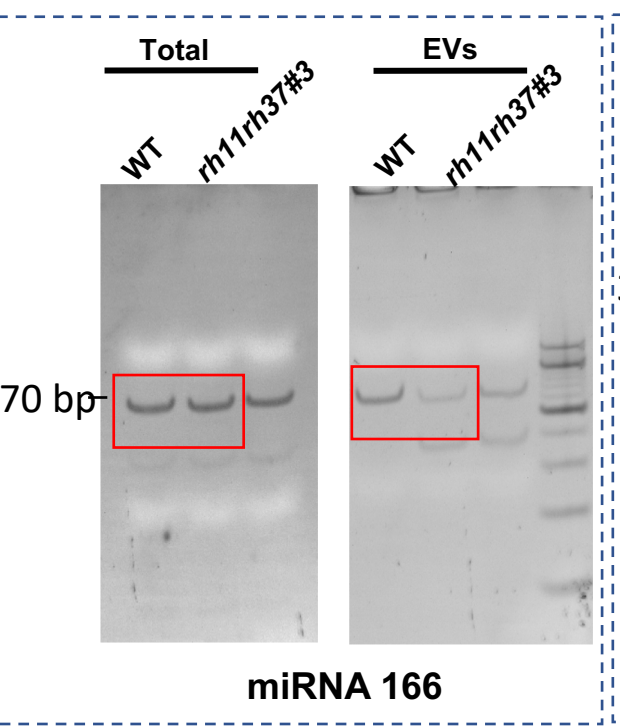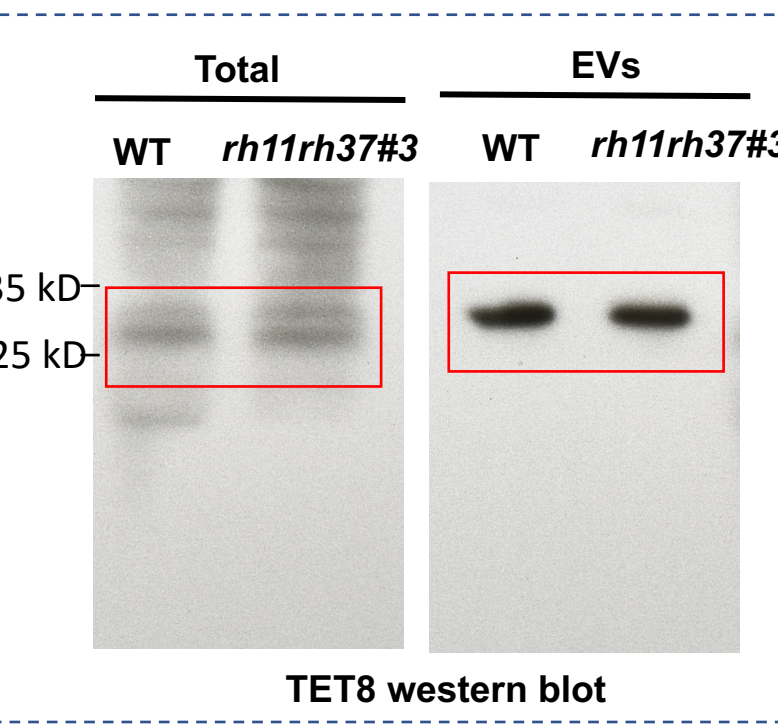

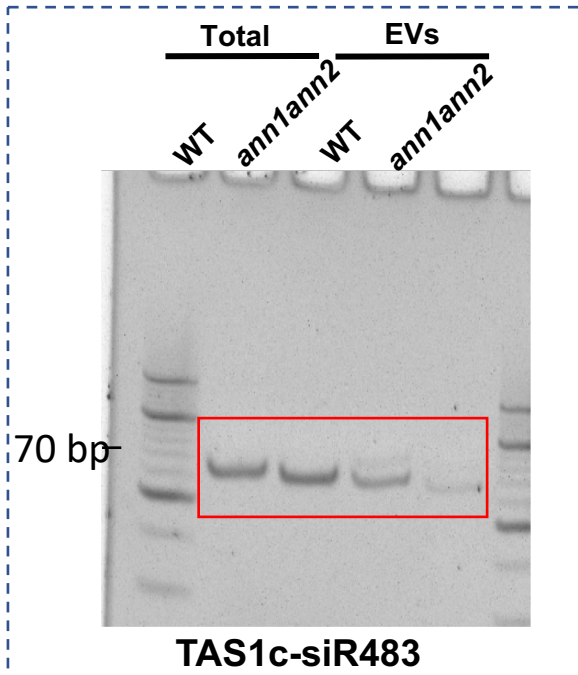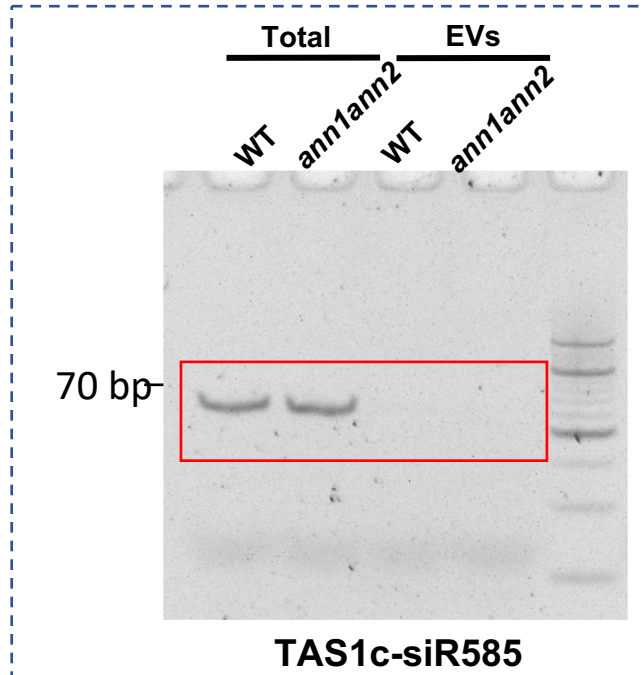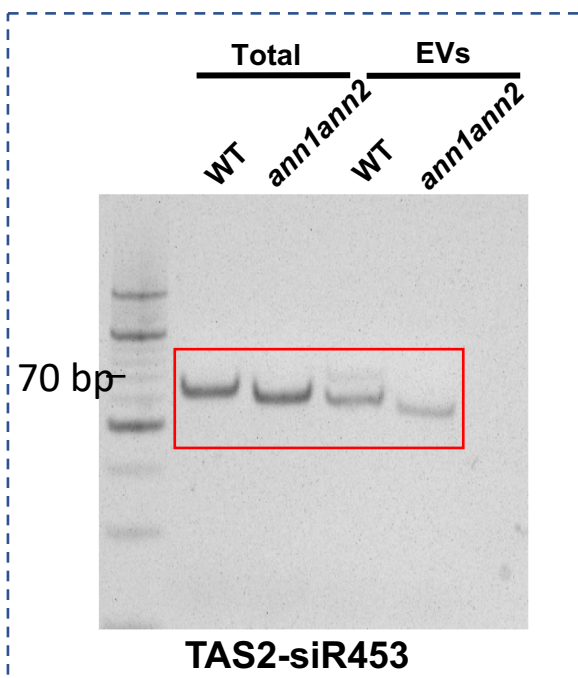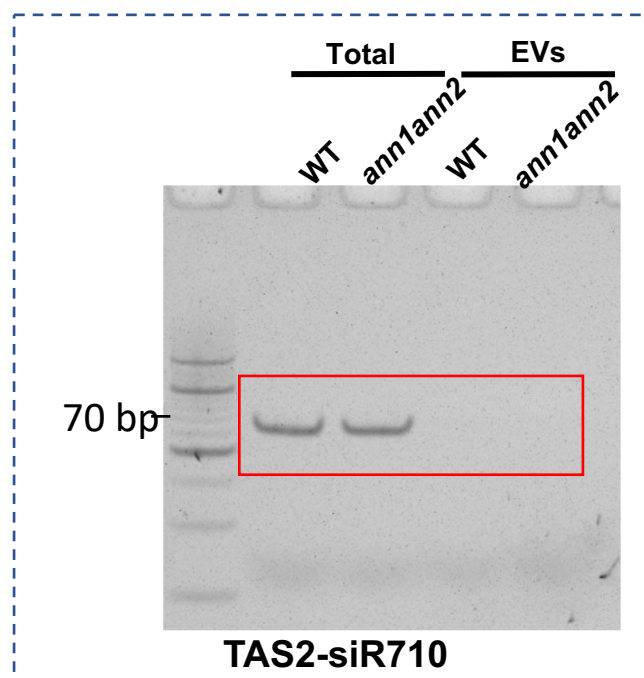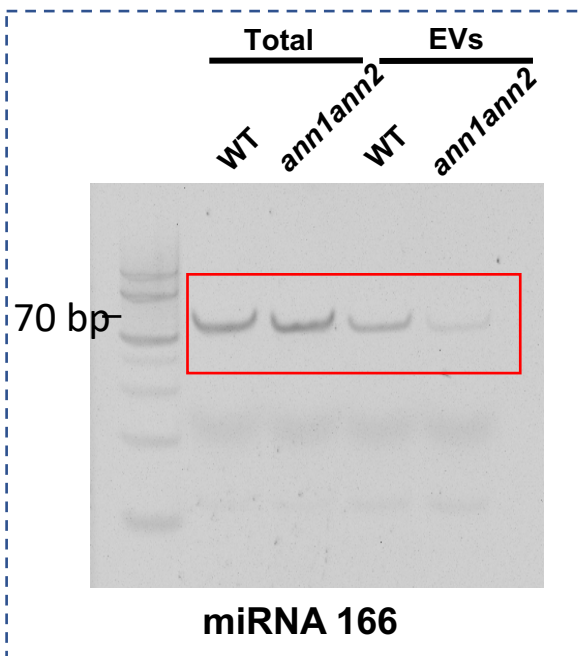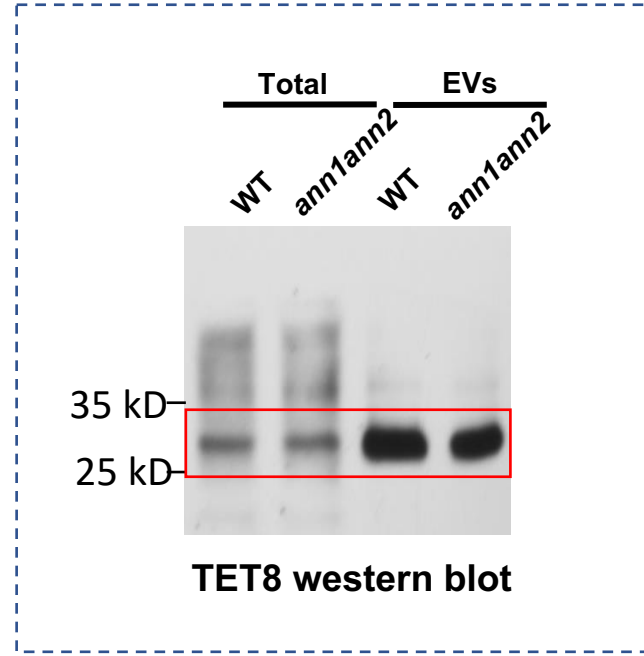

Supplement: NIHMS1667199-supplement-1667199_SourceData_Fig6.pdf [file NIHMS1667199-supplement-1667199_SourceData_Fig6.pdf]
